# Supplementary material
Source: ML conference proceedings conference paper supplement (https://openreview.net/forum?id=3MiADMHY62)
Supplement: supplementary_material [file Cartpole_vf_and_cf.xlsx]

## Sheet: Sheet1
	vf	cf
0	-0.0683892	0.0465605
1	-0.0524574	0.0693075
2	-0.0354879	0.0943152
3	-0.0170096	0.120182
4	0.00379245	0.15071
5	0.0264055	0.180797
6	0.0522812	0.214745
7	0.0813681	0.253891
8	0.111931	0.297114
9	0.146105	0.342901
10	0.181993	0.388816
11	0.221881	0.441812
12	0.266351	0.501502
13	0.312253	0.56019
14	0.367472	0.621586
15	0.418359	0.691644
16	0.473891	0.762508
17	0.537279	0.833833
18	0.598324	0.911203
19	0.661698	0.981465
20	0.732022	1.06027
21	0.798682	1.13021
22	0.875333	1.20354
23	0.953852	1.26375
24	1.02066	1.31814
25	1.10175	1.36105
26	1.17208	1.38917
27	1.23655	1.40101
28	1.31006	1.41529
29	1.35935	1.40234
30	1.42664	1.39005
31	1.46459	1.37095
32	1.48252	1.34877
33	1.50705	1.3191
34	1.50431	1.28791
35	1.50593	1.25006
36	1.49082	1.21521
37	1.45373	1.18536
38	1.42194	1.15486
39	1.40063	1.12672
40	1.37428	1.10547
41	1.34165	1.08647
42	1.28387	1.07218
43	1.25345	1.06197
44	1.21319	1.05383
45	1.19276	1.0501
46	1.15929	1.05111
47	1.14063	1.0562
48	1.11342	1.06513
49	1.10148	1.06732
50	1.10265	1.08442
51	1.09118	1.0934
52	1.09018	1.10691
53	1.09838	1.12056
54	1.09521	1.13613
55	1.11292	1.14932
56	1.11883	1.16194
57	1.13496	1.16925
58	1.14295	1.17634
59	1.16866	1.19006
60	1.17573	1.18552
61	1.19144	1.19819
62	1.20999	1.20166
63	1.21725	1.20088
64	1.23334	1.20105
65	1.24577	1.19517
66	1.23933	1.19499
67	1.24726	1.18696
68	1.25033	1.17942
69	1.24161	1.16177
70	1.24754	1.15229
71	1.24996	1.13991
72	1.24016	1.13133
73	1.22797	1.12404
74	1.21524	1.12051
75	1.21112	1.11543
76	1.20717	1.1199
77	1.20198	1.1176
78	1.20686	1.12447
79	1.19475	1.12936
80	1.1963	1.13395
81	1.19272	1.1324
82	1.19292	1.14184
83	1.20638	1.14892
84	1.19641	1.15035
85	1.20189	1.15617
86	1.20762	1.16487
87	1.20189	1.16088
88	1.19728	1.16787
89	1.20001	1.16896
90	1.20131	1.16179
91	1.20099	1.16452
92	1.20791	1.15952
93	1.20309	1.15716
94	1.21558	1.14946
95	1.20892	1.14313
96	1.22207	1.14538
97	1.21373	1.14849
98	1.21496	1.14662
99	1.22404	1.14903
100	1.22924	1.14455
101	1.23352	1.14514
102	1.23126	1.14804
103	1.23034	1.14675
104	1.23088	1.14179
105	1.22408	1.14395
106	1.22667	1.14776
107	1.2202	1.14115
108	1.22968	1.14624
109	1.22089	1.15257
110	1.21198	1.14459
111	1.21845	1.15244
112	1.20526	1.14132
113	1.20785	1.14172
114	1.20835	1.14002
115	1.21235	1.14453
116	1.21762	1.15396
117	1.226	1.14643
118	1.22457	1.14865
119	1.21262	1.14622
120	1.20578	1.15022
121	1.20906	1.15139
122	1.20176	1.15039
123	1.20173	1.14831
124	1.20182	1.14523
125	1.19827	1.15248
126	1.1926	1.14951
127	1.20809	1.1641
128	1.21033	1.16486
129	1.20566	1.15799
130	1.21656	1.16555
131	1.21193	1.16042
132	1.22316	1.16454
133	1.22987	1.16109
134	1.2328	1.15578
135	1.22857	1.15211
136	1.22935	1.15153
137	1.2187	1.14877
138	1.22004	1.15405
139	1.20954	1.14393
140	1.21258	1.15299
141	1.21102	1.14784
142	1.20904	1.15071
143	1.20763	1.14595
144	1.19658	1.14752
145	1.19283	1.14746
146	1.19042	1.14506
147	1.19125	1.14521
148	1.1988	1.1444
149	1.20081	1.14646
150	1.21272	1.15589
151	1.21525	1.15695
152	1.22615	1.15427
153	1.22848	1.15633
154	1.22861	1.1553
155	1.23308	1.15765
156	1.22617	1.15832
157	1.2237	1.15199
158	1.22705	1.1657
159	1.22862	1.16035
160	1.23246	1.16712
161	1.23944	1.17275
162	1.23643	1.16625
163	1.24214	1.17087
164	1.24088	1.16767
165	1.23591	1.16717
166	1.25583	1.17024
167	1.23439	1.16296
168	1.24228	1.16479
169	1.22167	1.1556
170	1.21567	1.15713
171	1.20848	1.14975
172	1.19788	1.14034
173	1.20886	1.14937
174	1.20628	1.14699
175	1.21212	1.14004
176	1.22492	1.1452
177	1.21536	1.14689
178	1.2231	1.15309
179	1.21967	1.16033
180	1.21989	1.16425
181	1.21595	1.16769
182	1.21269	1.17167
183	1.21122	1.17443
184	1.20458	1.17582
185	1.21315	1.1722
186	1.20493	1.17138
187	1.21419	1.16938
188	1.19587	1.15567
189	1.20086	1.16172
190	1.21889	1.15478
191	1.19977	1.14618
192	1.22094	1.15003
193	1.23898	1.15284
194	1.22542	1.15167
195	1.25644	1.15258
196	1.22379	1.14756
197	1.22831	1.1509
198	1.23282	1.14815
199	1.21674	1.15462
200	1.19945	1.14627
201	1.20647	1.14564
202	1.20798	1.14731
203	1.20541	1.15219
204	1.22157	1.15176
205	1.20968	1.13845
206	1.21925	1.1437
207	1.20421	1.13681
208	1.20086	1.14677
209	1.21082	1.15502
210	1.21064	1.16312
211	1.21494	1.15646
212	1.20743	1.16971
213	1.22176	1.15992
214	1.20802	1.1578
215	1.21074	1.15558
216	1.21182	1.15936
217	1.1976	1.1465
218	1.2135	1.14477
219	1.21211	1.13678
220	1.20725	1.13887
221	1.2133	1.14278
222	1.22033	1.1325
223	1.23846	1.13175
224	1.23833	1.13711
225	1.23058	1.13546
226	1.24308	1.13763
227	1.24828	1.14565
228	1.23995	1.15595
229	1.25104	1.16846
230	1.22502	1.17367
231	1.21508	1.16974
232	1.21497	1.176
233	1.2257	1.17491
234	1.18556	1.17104
235	1.18942	1.1649
236	1.18985	1.16785
237	1.21709	1.16044
238	1.19489	1.15435
239	1.21272	1.15674
240	1.19554	1.15161
241	1.20036	1.15076
242	1.20221	1.14346
243	1.19212	1.13537
244	1.19032	1.14209
245	1.19349	1.13115
246	1.19694	1.13068
247	1.20113	1.1297
248	1.21865	1.1372
249	1.19326	1.14103
250	1.19357	1.1472
251	1.20906	1.15264
252	1.21591	1.14783
253	1.21806	1.1499
254	1.23404	1.15633
255	1.21765	1.15752
256	1.22014	1.14992
257	1.21665	1.15578
258	1.24366	1.15916
259	1.20483	1.1577
260	1.21035	1.15366
261	1.22842	1.154
262	1.20564	1.15766
263	1.21565	1.15645
264	1.2403	1.15661
265	1.2361	1.15891
266	1.26849	1.16501
267	1.24105	1.1596
268	1.27826	1.16376
269	1.234	1.16015
270	1.21883	1.15955
271	1.19137	1.16384
272	1.19257	1.15517
273	1.18825	1.14989
274	1.19924	1.15188
275	1.18389	1.14891
276	1.19806	1.1451
277	1.2002	1.14813
278	1.20908	1.14064
279	1.23161	1.13476
280	1.23426	1.13448
281	1.23045	1.12819
282	1.22743	1.13195
283	1.22484	1.13685
284	1.24523	1.13638
285	1.21543	1.14109
286	1.25417	1.14547
287	1.21374	1.14435
288	1.21968	1.15233
289	1.21915	1.1545
290	1.23399	1.16099
291	1.24631	1.16502
292	1.23221	1.16467
293	1.22659	1.16224
294	1.24973	1.15816
295	1.26485	1.16378
296	1.25434	1.17073
297	1.28515	1.17886
298	1.26252	1.17941
299	1.28968	1.18256
300	1.26219	1.19114
301	1.23452	1.18935
302	1.212	1.18034
303	1.1977	1.1682
304	1.18262	1.16307
305	1.1947	1.14823
306	1.19787	1.14322
307	1.1992	1.13642
308	1.22149	1.13372
309	1.25743	1.13694
310	1.23528	1.14231
311	1.25453	1.14297
312	1.25251	1.14991
313	1.24713	1.15345
314	1.24409	1.16498
315	1.22699	1.15827
316	1.22781	1.15859
317	1.19963	1.15643
318	1.22005	1.15837
319	1.17566	1.15225
320	1.21306	1.14329
321	1.26267	1.13816
322	1.20738	1.13379
323	1.2398	1.12629
324	1.19996	1.12134
325	1.20661	1.11995
326	1.20954	1.12235
327	1.20105	1.13345
328	1.19576	1.14112
329	1.19058	1.14812
330	1.18324	1.15993
331	1.17563	1.16183
332	1.172	1.16723
333	1.18656	1.16741
334	1.17996	1.15959
335	1.16821	1.14872
336	1.18302	1.13858
337	1.18297	1.13243
338	1.22998	1.12817
339	1.21547	1.13263
340	1.23629	1.13037
341	1.25287	1.12973
342	1.26961	1.12829
343	1.30179	1.13749
344	1.2649	1.14453
345	1.31378	1.15889
346	1.27275	1.16337
347	1.29305	1.17003
348	1.23086	1.16984
349	1.20929	1.16746
350	1.19644	1.16721
351	1.19182	1.15994
352	1.15516	1.14921
353	1.1644	1.14567
354	1.17545	1.13824
355	1.18018	1.13752
356	1.22498	1.13421
357	1.2416	1.1404
358	1.26532	1.14493
359	1.23503	1.15529
360	1.21397	1.1577
361	1.20086	1.15586
362	1.21971	1.15134
363	1.16884	1.14737
364	1.16508	1.14611
365	1.17742	1.13338
366	1.18226	1.13207
367	1.21122	1.13666
368	1.20303	1.13764
369	1.22064	1.14132
370	1.22782	1.14715
371	1.25425	1.14352
372	1.25919	1.14564
373	1.24066	1.16053
374	1.26362	1.16733
375	1.24887	1.17262
376	1.23262	1.17989
377	1.19836	1.17948
378	1.1971	1.17051
379	1.1531	1.16971
380	1.18973	1.16207
381	1.16101	1.15988
382	1.14893	1.14895
383	1.2237	1.14059
384	1.16977	1.13712
385	1.21911	1.1372
386	1.25723	1.12803
387	1.26976	1.13393
388	1.25122	1.13877
389	1.23571	1.14361
390	1.23561	1.14963
391	1.22703	1.14934
392	1.19561	1.15497
393	1.1999	1.14599
394	1.16454	1.15268
395	1.16663	1.14631
396	1.14558	1.14307
397	1.16448	1.14766
398	1.15103	1.14909
399	1.17382	1.15463
400	1.18109	1.15698
401	1.20898	1.15614
402	1.22991	1.15231
403	1.25841	1.14345
404	1.25082	1.14496
405	1.28919	1.14346
406	1.29287	1.14273
407	1.28342	1.13949
408	1.26054	1.14757
409	1.25006	1.14631
410	1.22497	1.15016
411	1.22238	1.14504
412	1.21151	1.15307
413	1.15984	1.16458
414	1.17166	1.16472
415	1.17283	1.16781
416	1.17401	1.16584
417	1.17601	1.16523
418	1.17203	1.16091
419	1.186	1.1571
420	1.20443	1.1525
421	1.18272	1.15147
422	1.21204	1.14709
423	1.24861	1.15098
424	1.26739	1.1413
425	1.2099	1.13831
426	1.20806	1.13538
427	1.22797	1.12739
428	1.26186	1.12699
429	1.24995	1.12212
430	1.1965	1.12921
431	1.25514	1.1282
432	1.24973	1.13483
433	1.25749	1.14097
434	1.19941	1.14832
435	1.19311	1.15449
436	1.18462	1.15896
437	1.17771	1.16117
438	1.15321	1.16594
439	1.17641	1.16981
440	1.19419	1.16989
441	1.18334	1.16296
442	1.21428	1.15516
443	1.21761	1.1523
444	1.25467	1.14226
445	1.2444	1.13987
446	1.24488	1.13692
447	1.26844	1.12739
448	1.21024	1.1335
449	1.24229	1.12999
450	1.17133	1.1364
451	1.18022	1.13947
452	1.15633	1.13844
453	1.16913	1.14429
454	1.17491	1.14169
455	1.17314	1.15567
456	1.20749	1.15631
457	1.21041	1.16454
458	1.18694	1.17044
459	1.23962	1.16274
460	1.26703	1.16675
461	1.26483	1.15526
462	1.26115	1.14902
463	1.2619	1.14523
464	1.23838	1.14629
465	1.21412	1.15066
466	1.22991	1.14768
467	1.20308	1.13723
468	1.25152	1.14181
469	1.22479	1.14242
470	1.21229	1.1413
471	1.21106	1.13954
472	1.18869	1.15187
473	1.22574	1.14883
474	1.21076	1.16286
475	1.23524	1.1799
476	1.20999	1.18895
477	1.23265	1.20545
478	1.21543	1.20514
479	1.24348	1.19727
480	1.24571	1.18773
481	1.26463	1.17455
482	1.25546	1.15802
483	1.24574	1.13806
484	1.23463	1.12916
485	1.21113	1.12816
486	1.18889	1.13006
487	1.23071	1.12961
488	1.24151	1.1271
489	1.23486	1.13128
490	1.22158	1.13885
491	1.22437	1.144
492	1.20881	1.14891
493	1.20757	1.14948
494	1.19998	1.14516
495	1.17778	1.14884
496	1.17722	1.15308
497	1.18776	1.15197
498	1.204	1.15037
499	1.19373	1.15142
500	1.21368	1.14849
501	1.20808	1.14243
502	1.19547	1.1358
503	1.18398	1.13021
504	1.22264	1.12579
505	1.20814	1.13638
506	1.27376	1.14423
507	1.22689	1.15253
508	1.22334	1.1508
509	1.20581	1.15355
510	1.22414	1.15094
511	1.20889	1.1538
512	1.19985	1.15343
513	1.1884	1.15133
514	1.20211	1.15119
515	1.22615	1.15795
516	1.19848	1.15256
517	1.22997	1.15054
518	1.24402	1.15068
519	1.25485	1.14871
520	1.25535	1.14222
521	1.2355	1.14695
522	1.24251	1.13379
523	1.20006	1.14103
524	1.21911	1.13399
525	1.20539	1.14574
526	1.18832	1.1487
527	1.15003	1.15575
528	1.20062	1.15719
529	1.15684	1.16455
530	1.16831	1.16079
531	1.17222	1.16131
532	1.17673	1.1507
533	1.23727	1.15386
534	1.21174	1.15065
535	1.20901	1.15378
536	1.22384	1.15633
537	1.24314	1.15288
538	1.24944	1.16377
539	1.21212	1.17333
540	1.21667	1.1836
541	1.21032	1.18771
542	1.21599	1.18482
543	1.20005	1.17618
544	1.18589	1.1697
545	1.17019	1.15641
546	1.19988	1.14271
547	1.18129	1.13067
548	1.19736	1.12531
549	1.14175	1.12075
550	1.20774	1.11589
551	1.16938	1.11741
552	1.25668	1.12632
553	1.23839	1.14334
554	1.21325	1.16361
555	1.2557	1.17826
556	1.28953	1.19849
557	1.27141	1.18951
558	1.26293	1.18708
559	1.19762	1.16847
560	1.18334	1.16248
561	1.18169	1.15457
562	1.19217	1.14036
563	1.15605	1.13629
564	1.20192	1.12181
565	1.11797	1.12303
566	1.16741	1.12572
567	1.21092	1.12583
568	1.19673	1.13421
569	1.21703	1.14013
570	1.23599	1.14883
571	1.23126	1.16212
572	1.25887	1.18496
573	1.27498	1.19514
574	1.30295	1.20461
575	1.24395	1.20709
576	1.27149	1.20486
577	1.27237	1.20043
578	1.21202	1.18763
579	1.19625	1.17927
580	1.19582	1.16464
581	1.20252	1.14502
582	1.16977	1.13395
583	1.18887	1.11512
584	1.19218	1.11287
585	1.20739	1.11481
586	1.19659	1.12045
587	1.18595	1.12492
588	1.20601	1.14222
589	1.21106	1.14876
590	1.24349	1.16684
591	1.28264	1.16139
592	1.24811	1.17017
593	1.23891	1.17481
594	1.18394	1.17181
595	1.19028	1.17141
596	1.19346	1.16056
597	1.17141	1.16838
598	1.122	1.17775
599	1.13907	1.15723
600	1.12432	1.15926
601	1.11859	1.14696
602	1.14223	1.13975
603	1.15441	1.13272
604	1.21957	1.13049
605	1.24191	1.12648
606	1.26823	1.1306
607	1.26544	1.13739
608	1.27304	1.15084
609	1.25992	1.15591
610	1.26395	1.1604
611	1.23043	1.16342
612	1.2402	1.1643
613	1.2583	1.1714
614	1.23841	1.16218
615	1.17748	1.16965
616	1.18919	1.16331
617	1.22787	1.16959
618	1.17435	1.1674
619	1.12643	1.14813
620	1.10338	1.1454
621	1.09604	1.12955
622	1.1401	1.12776
623	1.19274	1.12676
624	1.20253	1.13962
625	1.25653	1.15137
626	1.2472	1.1534
627	1.30041	1.16904
628	1.27407	1.17225
629	1.31911	1.16323
630	1.29586	1.15977
631	1.20509	1.15827
632	1.2366	1.15604
633	1.19372	1.1417
634	1.09846	1.13425
635	1.11774	1.13147
636	1.15292	1.13511
637	1.09965	1.13721
638	1.17453	1.15221
639	1.20721	1.14802
640	1.27324	1.15864
641	1.26371	1.16496
642	1.28979	1.17815
643	1.34093	1.18807
644	1.25832	1.17694
645	1.24856	1.17022
646	1.25099	1.15705
647	1.18684	1.14661
648	1.1865	1.13014
649	1.12678	1.12361
650	1.07325	1.11806
651	1.10464	1.12197
652	1.14055	1.12226
653	1.07377	1.12939
654	1.1631	1.13286
655	1.19377	1.14302
656	1.26064	1.15402
657	1.27357	1.1571
658	1.33592	1.16126
659	1.30619	1.17115
660	1.27916	1.17696
661	1.25762	1.18506
662	1.27576	1.18671
663	1.20974	1.19772
664	1.23049	1.18774
665	1.20769	1.17145
666	1.17267	1.1612
667	1.13956	1.16517
668	1.12715	1.14853
669	1.20874	1.13543
670	1.07731	1.13889
671	1.21956	1.14129
672	1.21833	1.13508
673	1.2928	1.1408
674	1.25513	1.15605
675	1.26535	1.15744
676	1.29248	1.16433
677	1.21172	1.16954
678	1.2237	1.16449
679	1.1367	1.15972
680	1.16096	1.15178
681	1.13438	1.15322
682	1.17275	1.14258
683	1.17562	1.14416
684	1.16691	1.15288
685	1.16904	1.14504
686	1.21612	1.14367
687	1.14978	1.14662
688	1.24012	1.14008
689	1.14673	1.14468
690	1.20912	1.13857
691	1.22469	1.15409
692	1.19446	1.14749
693	1.25832	1.14177
694	1.23012	1.15101
695	1.27507	1.15071
696	1.25364	1.154
697	1.20379	1.15774
698	1.249	1.14678
699	1.18625	1.15182
700	1.21056	1.14528
701	1.21001	1.14086
702	1.18893	1.14084
703	1.25598	1.15048
704	1.22179	1.15264
705	1.21693	1.13848
706	1.16783	1.1401
707	1.15421	1.14645
708	1.20946	1.15027
709	1.19082	1.15384
710	1.21217	1.15624
711	1.23937	1.15116
712	1.22444	1.14442
713	1.23769	1.13796
714	1.19884	1.14245
715	1.2149	1.14217
716	1.19559	1.132
717	1.20948	1.13225
718	1.24143	1.12235
719	1.17028	1.12533
720	1.21254	1.12851
721	1.21317	1.13453
722	1.19391	1.14148
723	1.18837	1.15651
724	1.16261	1.15865
725	1.26349	1.16745
726	1.21969	1.18101
727	1.18959	1.18273
728	1.18968	1.17918
729	1.20809	1.17937
730	1.18396	1.16673
731	1.24502	1.16224
732	1.22923	1.14983
733	1.27238	1.14207
734	1.21701	1.14282
735	1.22758	1.14494
736	1.23048	1.14728
737	1.22082	1.14345
738	1.26832	1.14961
739	1.18211	1.15545
740	1.14721	1.16166
741	1.16838	1.1635
742	1.17132	1.1797
743	1.17291	1.17678
744	1.20361	1.1776
745	1.22582	1.1697
746	1.23303	1.16063
747	1.23989	1.13907
748	1.25599	1.12444
749	1.19211	1.11676
750	1.23332	1.11535
751	1.21204	1.13275
752	1.16019	1.1293
753	1.11737	1.15075
754	1.15813	1.16316
755	1.16269	1.18194
756	1.13079	1.18136
757	1.17281	1.17357
758	1.13226	1.16935
759	1.19342	1.15558
760	1.2377	1.14309
761	1.26464	1.13091
762	1.29199	1.14362
763	1.29167	1.14047
764	1.31953	1.14055
765	1.22886	1.14784
766	1.2761	1.15172
767	1.25321	1.1664
768	1.20964	1.17641
769	1.24019	1.16745
770	1.17146	1.16204
771	1.16859	1.15483
772	1.15991	1.1429
773	1.14994	1.13574
774	1.19743	1.12615
775	1.19169	1.11605
776	1.21236	1.11519
777	1.20425	1.12372
778	1.23034	1.11776
779	1.22375	1.1335
780	1.27809	1.13559
781	1.20395	1.14063
782	1.21065	1.15993
783	1.12736	1.16857
784	1.19376	1.16925
785	1.23574	1.17031
786	1.20225	1.15026
787	1.20257	1.1545
788	1.19842	1.14578
789	1.22852	1.13689
790	1.19005	1.1337
791	1.18794	1.14575
792	1.18354	1.13629
793	1.1992	1.14065
794	1.21467	1.15037
795	1.2951	1.16304
796	1.23137	1.17218
797	1.24758	1.17303
798	1.25455	1.16718
799	1.21674	1.17524
800	1.18387	1.16534
801	1.22895	1.15132
802	1.20144	1.13981
803	1.22257	1.13119
804	1.21146	1.13946
805	1.22168	1.14241
806	1.18519	1.15247
807	1.16649	1.17088
808	1.2514	1.15282
809	1.2344	1.15374
810	1.19579	1.15376
811	1.19762	1.14338
812	1.19496	1.14262
813	1.2133	1.13173
814	1.21718	1.14568
815	1.2304	1.14451
816	1.18261	1.14237
817	1.2162	1.15753
818	1.24536	1.15625
819	1.24665	1.15699
820	1.14291	1.14696
821	1.24619	1.13777
822	1.17341	1.15852
823	1.21489	1.14922
824	1.22435	1.14975
825	1.241	1.16207
826	1.21483	1.15832
827	1.21459	1.16005
828	1.20383	1.15771
829	1.19482	1.1513
830	1.19338	1.14055
831	1.14553	1.13078
832	1.15021	1.13422
833	1.1041	1.10862
834	1.14238	1.10615
835	1.15565	1.11734
836	1.21096	1.11799
837	1.19044	1.13784
838	1.23636	1.15529
839	1.27232	1.16496
840	1.2889	1.17803
841	1.24322	1.17846
842	1.20191	1.17503
843	1.11031	1.17491
844	1.23002	1.14704
845	1.20406	1.13756
846	1.15902	1.11456
847	1.22616	1.10723
848	1.17623	1.09284
849	1.20459	1.09743
850	1.11568	1.12741
851	1.20193	1.11548
852	1.16463	1.13902
853	1.21131	1.1505
854	1.21245	1.17785
855	1.21837	1.18798
856	1.2456	1.18609
857	1.196	1.20678
858	1.22608	1.17255
859	1.22257	1.1626
860	1.2118	1.15132
861	1.26536	1.13512
862	1.2215	1.12586
863	1.2113	1.12861
864	1.16265	1.13671
865	1.18041	1.15085
866	1.1269	1.15478
867	1.18529	1.17046
868	1.15279	1.15492
869	1.16248	1.14114
870	1.18017	1.1472
871	1.26645	1.14827
872	1.242	1.15081
873	1.29208	1.15113
874	1.25944	1.1561
875	1.24831	1.16153
876	1.25685	1.13626
877	1.23054	1.1503
878	1.27542	1.13453
879	1.21002	1.13752
880	1.16696	1.13775
881	1.13548	1.13754
882	1.19799	1.14177
883	1.14096	1.14653
884	1.13538	1.14673
885	1.14806	1.14782
886	1.16075	1.14819
887	1.19737	1.13592
888	1.23832	1.13875
889	1.21998	1.14519
890	1.28965	1.13566
891	1.30406	1.14829
892	1.31642	1.16117
893	1.24246	1.15809
894	1.24553	1.15783
895	1.19769	1.16079
896	1.16732	1.15156
897	1.12892	1.15522
898	1.12413	1.13862
899	1.17541	1.12873
900	1.1097	1.12475
901	1.13942	1.12012
902	1.19955	1.12012
903	1.18842	1.12512
904	1.22289	1.12609
905	1.29401	1.13632
906	1.31313	1.14601
907	1.30909	1.1677
908	1.33403	1.17055
909	1.29365	1.19181
910	1.22507	1.20062
911	1.1465	1.18436
912	1.04077	1.14392
913	1.08189	1.12929
914	1.15944	1.11329
915	1.0758	1.11126
916	1.18425	1.1084
917	1.27177	1.1147
918	1.23364	1.13418
919	1.25114	1.18119
920	1.33194	1.17901
921	1.33902	1.18835
922	1.2769	1.20094
923	1.27542	1.18328
924	1.17026	1.17323
925	1.20847	1.1408
926	1.1811	1.12673
927	1.07183	1.12525
928	1.12106	1.11542
929	1.15774	1.11477
930	1.13836	1.12803
931	1.19637	1.14869
932	1.23052	1.16438
933	1.24508	1.17926
934	1.25411	1.18989
935	1.3168	1.17079
936	1.26777	1.17035
937	1.25219	1.15813
938	1.24371	1.13291
939	1.23528	1.12971
940	1.23116	1.11404
941	1.1115	1.138
942	1.13586	1.11763
943	1.14839	1.1475
944	1.13022	1.16019
945	1.18069	1.13992
946	1.15738	1.16087
947	1.22196	1.16396
948	1.23674	1.16392
949	1.23558	1.19473
950	1.21889	1.1758
951	1.25022	1.16748
952	1.32568	1.15143
953	1.29042	1.13457
954	1.185	1.16156
955	1.20498	1.14535
956	1.20475	1.1443
957	1.21866	1.14195
958	1.1511	1.14456
959	1.18214	1.13197
960	1.18088	1.1368
961	1.15494	1.13584
962	1.187	1.12873
963	1.19059	1.12194
964	1.20967	1.12908
965	1.22465	1.13516
966	1.23602	1.14056
967	1.22957	1.13343
968	1.16259	1.17529
969	1.16659	1.15853
970	1.23731	1.15888
971	1.21847	1.15615
972	1.17568	1.16478
973	1.20992	1.15596
974	1.21161	1.15705
975	1.18726	1.15079
976	1.21874	1.15985
977	1.19149	1.15334
978	1.17123	1.15912
979	1.18921	1.1435
980	1.17649	1.11359
981	1.23006	1.13197
982	1.15441	1.14122
983	1.16007	1.16345
984	1.18902	1.1488
985	1.21996	1.17147
986	1.23544	1.157
987	1.21747	1.16623
988	1.26488	1.13035
989	1.24749	1.12943
990	1.23089	1.11308
991	1.1811	1.1445
992	1.13669	1.14392
993	1.13645	1.14647
994	1.18419	1.15692
995	1.2053	1.15222
996	1.19593	1.1434
997	1.18574	1.17542
998	1.25025	1.15967
999	1.22253	1.15816
1000	1.28988	1.1638
1001	1.2805	1.15822
1002	1.23051	1.16068
1003	1.24001	1.16942
1004	1.23682	1.15073
1005	1.23302	1.15114
1006	1.16547	1.17377
1007	1.17555	1.14946
1008	1.06952	1.14659
1009	1.1883	1.15188
1010	1.22904	1.15227
1011	1.17543	1.16286
1012	1.21571	1.15511
1013	1.27621	1.16301
1014	1.23629	1.15059
1015	1.24182	1.1636
1016	1.25112	1.16371
1017	1.25277	1.16327
1018	1.27336	1.15417
1019	1.25994	1.13513
1020	1.26358	1.14223
1021	1.26016	1.15273
1022	1.20387	1.14015
1023	1.20515	1.15009
1024	1.16891	1.14094
1025	1.20315	1.14706
1026	1.18279	1.16913
1027	1.15931	1.16105
1028	1.123	1.16016
1029	1.1752	1.16152
1030	1.12972	1.15324
1031	1.25038	1.14041
1032	1.11703	1.15754
1033	1.28696	1.15642
1034	1.16432	1.16958
1035	1.26192	1.17276
1036	1.2932	1.17675
1037	1.24065	1.16932
1038	1.27964	1.13955
1039	1.10547	1.15371
1040	1.13869	1.17229
1041	1.18598	1.13795
1042	1.12639	1.14628
1043	1.15827	1.14126
1044	0.987771	1.19445
1045	1.17758	1.17248
1046	1.19915	1.16197
1047	1.22056	1.17322
1048	1.24524	1.18928
1049	1.18387	1.20033
1050	1.17632	1.20867
1051	1.23147	1.18185
1052	1.21427	1.16105
1053	1.24256	1.13466
1054	1.21497	1.12977
1055	1.19041	1.1353
1056	1.22551	1.10765
1057	1.19916	1.10798
1058	1.18833	1.13639
1059	1.20754	1.14597
1060	1.21726	1.15007
1061	1.17483	1.17094
1062	1.18672	1.15291
1063	1.19988	1.16243
1064	1.15626	1.18376
1065	1.17114	1.15208
1066	1.17713	1.13534
1067	1.15896	1.12244
1068	1.16769	1.12967
1069	1.2229	1.10704
1070	1.1821	1.12374
1071	1.18435	1.15817
1072	1.23509	1.16289
1073	1.2415	1.16655
1074	1.26352	1.18477
1075	1.26602	1.18338
1076	1.2968	1.17803
1077	1.21354	1.17136
1078	1.23127	1.15272
1079	1.16668	1.14178
1080	1.21354	1.11817
1081	1.16237	1.11191
1082	1.17105	1.10307
1083	1.17537	1.11212
1084	1.18128	1.13112
1085	1.11976	1.1668
1086	1.21087	1.16231
1087	1.2028	1.19727
1088	1.28016	1.16687
1089	1.27388	1.16506
1090	1.24225	1.15037
1091	1.24413	1.14825
1092	1.28163	1.12724
1093	1.24581	1.11309
1094	1.23937	1.12059
1095	1.22604	1.14523
1096	1.21884	1.11815
1097	1.18865	1.12033
1098	1.10569	1.17548
1099	1.1403	1.20173
1100	1.13116	1.21537
1101	1.15459	1.21497
1102	1.16623	1.19724
1103	1.11918	1.21931
1104	1.22598	1.18174
1105	1.19946	1.17386
1106	1.25276	1.1057
1107	1.27572	1.07278
1108	1.2605	1.08044
1109	1.27595	1.06925
1110	1.25471	1.0854
1111	1.28359	1.11923
1112	1.16801	1.17853
1113	1.21323	1.17402
1114	1.11982	1.19881
1115	1.12515	1.19214
1116	1.16318	1.17685
1117	1.19159	1.15955
1118	1.17115	1.15422
1119	1.16739	1.15857
1120	1.20475	1.15809
1121	1.25077	1.15684
1122	1.30641	1.13526
1123	1.27929	1.15048
1124	1.27913	1.14024
1125	1.25619	1.14664
1126	1.2525	1.17655
1127	1.2314	1.16712
1128	1.19108	1.20418
1129	1.20082	1.20508
1130	1.1916	1.17998
1131	1.1746	1.15571
1132	1.24586	1.1405
1133	1.2056	1.1247
1134	1.20784	1.14441
1135	1.2217	1.13943
1136	1.20877	1.15387
1137	1.19356	1.16169
1138	1.23586	1.16092
1139	1.23129	1.16806
1140	1.22806	1.16206
1141	1.22901	1.14955
1142	1.25282	1.15507
1143	1.24149	1.16372
1144	1.16742	1.17712
1145	1.18615	1.20032
1146	1.22241	1.14925
1147	1.1695	1.17836
1148	1.23607	1.15751
1149	1.21037	1.13806
1150	1.16854	1.14555
1151	1.26447	1.14229
1152	1.2087	1.16295
1153	1.27783	1.15947
1154	1.19082	1.15498
1155	1.24135	1.13755
1156	1.23058	1.13078
1157	1.213	1.12548
1158	1.16923	1.12298
1159	1.16005	1.11489
1160	1.2166	1.11813
1161	1.22533	1.12467
1162	1.24427	1.14784
1163	1.19281	1.15974
1164	1.26494	1.15602
1165	1.22846	1.16471
1166	1.18607	1.17227
1167	1.22783	1.15037
1168	1.22106	1.16652
1169	1.19148	1.17425
1170	1.24594	1.16848
1171	1.25846	1.13806
1172	1.20497	1.15041
1173	1.21864	1.13812
1174	1.21404	1.12081
1175	1.2103	1.12838
1176	1.20541	1.12537
1177	1.19135	1.13301
1178	1.16513	1.17623
1179	1.23782	1.13046
1180	1.2098	1.13915
1181	1.18228	1.15869
1182	1.14968	1.15478
1183	1.18601	1.15262
1184	1.14832	1.17588
1185	1.16907	1.18186
1186	1.21856	1.14782
1187	1.2229	1.15462
1188	1.23588	1.14741
1189	1.25068	1.11697
1190	1.24682	1.11817
1191	1.24663	1.12722
1192	1.18865	1.13613
1193	1.22114	1.14846
1194	1.19602	1.15654
1195	1.18179	1.17405
1196	1.17627	1.21875
1197	1.22626	1.19496
1198	1.23377	1.2095
1199	1.21634	1.18837
1200	1.25069	1.16899
1201	1.26547	1.16936
1202	1.2579	1.13736
1203	1.26084	1.12389
1204	1.2542	1.12443
1205	1.24047	1.14616
1206	1.20533	1.14752
1207	1.22441	1.15987
1208	1.14399	1.19605
1209	1.19944	1.17268
1210	1.20508	1.18685
1211	1.21073	1.185
1212	1.19045	1.16707
1213	1.24785	1.16386
1214	1.24067	1.15226
1215	1.15857	1.19563
1216	1.22594	1.12567
1217	1.23463	1.13148
1218	1.23237	1.11424
1219	1.18859	1.12956
1220	1.19759	1.14695
1221	1.17248	1.16708
1222	1.1613	1.16721
1223	1.17644	1.19193
1224	1.20771	1.18334
1225	1.23995	1.16582
1226	1.27588	1.16577
1227	1.27516	1.16481
1228	1.28385	1.13052
1229	1.28812	1.11207
1230	1.25765	1.11994
1231	1.25345	1.10864
1232	1.26916	1.11633
1233	1.19143	1.17287
1234	1.14034	1.17204
1235	1.20998	1.17445
1236	1.16313	1.18021
1237	1.19382	1.19064
1238	1.19599	1.1808
1239	1.21302	1.18867
1240	1.19462	1.18248
1241	1.25009	1.1475
1242	1.22588	1.14895
1243	1.24176	1.13294
1244	1.1822	1.16037
1245	1.21815	1.12096
1246	1.1839	1.12288
1247	1.1947	1.15993
1248	1.18921	1.12908
1249	1.20352	1.11785
1250	1.21985	1.10748
1251	1.2262	1.12272
1252	1.21262	1.14423
1253	1.20972	1.16378
1254	1.1326	1.23219
1255	1.16461	1.19353
1256	1.11474	1.20031
1257	1.10957	1.19373
1258	1.20145	1.16922
1259	1.18902	1.12267
1260	1.19795	1.09127
1261	1.19942	1.07832
1262	1.22643	1.07152
1263	1.10576	1.10947
1264	1.27028	1.10006
1265	1.23861	1.14555
1266	1.23558	1.14111
1267	1.25064	1.14579
1268	1.22936	1.16108
1269	1.25138	1.15909
1270	1.22146	1.1649
1271	1.20898	1.14859
1272	1.14155	1.15544
1273	1.22796	1.13645
1274	1.12834	1.14119
1275	1.19179	1.16246
1276	1.14678	1.15711
1277	1.21956	1.15483
1278	1.19795	1.16403
1279	1.21007	1.1534
1280	1.22453	1.16128
1281	1.21073	1.19591
1282	1.15533	1.21035
1283	1.207	1.16644
1284	1.18362	1.16129
1285	1.23503	1.13467
1286	1.2798	1.13017
1287	1.19689	1.14435
1288	1.23672	1.15481
1289	1.25839	1.15316
1290	1.2585	1.17066
1291	1.22474	1.1633
1292	1.24465	1.16957
1293	1.24098	1.16289
1294	1.23167	1.16884
1295	1.19892	1.15861
1296	1.18607	1.14263
1297	1.16695	1.12483
1298	1.20086	1.12418
1299	1.20771	1.14315
1300	1.2417	1.12907
1301	1.23865	1.1368
1302	1.22999	1.13401
1303	1.22604	1.13912
1304	1.21829	1.15395
1305	1.19664	1.2029
1306	1.23394	1.14577
1307	1.19653	1.15561
1308	1.19923	1.14918
1309	1.2186	1.13743
1310	1.21264	1.11037
1311	1.20307	1.1223
1312	1.17844	1.15347
1313	1.21555	1.11723
1314	1.21105	1.13978
1315	1.24837	1.1392
1316	1.23924	1.16598
1317	1.24762	1.16265
1318	1.25599	1.17135
1319	1.17942	1.17682
1320	1.22307	1.14775
1321	1.18997	1.11233
1322	1.16345	1.11403
1323	1.17468	1.12982
1324	1.16956	1.11537
1325	1.18206	1.13346
1326	1.21463	1.14032
1327	1.2226	1.15526
1328	1.24186	1.14586
1329	1.25634	1.16451
1330	1.21149	1.17368
1331	1.19034	1.16924
1332	1.1596	1.20198
1333	1.1915	1.13751
1334	1.21175	1.11918
1335	1.1412	1.16026
1336	1.18057	1.1489
1337	1.15573	1.15276
1338	1.23657	1.15744
1339	1.24276	1.13771
1340	1.24926	1.13887
1341	1.23291	1.18223
1342	1.16928	1.16784
1343	1.18659	1.18235
1344	1.23236	1.14875
1345	1.1296	1.17371
1346	1.17585	1.14629
1347	1.21197	1.11936
1348	1.20014	1.1213
1349	1.1846	1.10383
1350	1.23499	1.11288
1351	1.21854	1.12083
1352	1.15794	1.14227
1353	1.24884	1.15088
1354	1.25568	1.17792
1355	1.22705	1.1816
1356	1.24272	1.1636
1357	1.23426	1.14452
1358	1.20256	1.15768
1359	1.17614	1.14783
1360	1.12917	1.15325
1361	1.16123	1.1988
1362	1.19283	1.16766
1363	1.15427	1.17197
1364	1.21933	1.13985
1365	1.2403	1.13485
1366	1.22455	1.13514
1367	1.25361	1.15977
1368	1.2424	1.13189
1369	1.1725	1.18565
1370	1.18969	1.18379
1371	1.20366	1.22854
1372	1.19273	1.17786
1373	1.19644	1.18423
1374	1.16703	1.18188
1375	1.20497	1.11822
1376	1.23379	1.1268
1377	1.18067	1.15561
1378	1.16941	1.19806
1379	1.24567	1.1493
1380	1.23534	1.15956
1381	1.22491	1.1279
1382	1.06936	1.16117
1383	1.1974	1.11562
1384	1.1683	1.1584
1385	1.16154	1.14941
1386	1.07883	1.16252
1387	1.16726	1.12448
1388	1.20047	1.13153
1389	1.19008	1.12988
1390	1.26482	1.14247
1391	1.20044	1.14788
1392	1.22845	1.16506
1393	1.21487	1.17085
1394	1.16743	1.17566
1395	1.19031	1.16418
1396	1.18117	1.14871
1397	1.18113	1.15073
1398	1.18526	1.1413
1399	1.14342	1.16346
1400	1.22473	1.15668
1401	1.22022	1.14281
1402	1.23844	1.15626
1403	1.25882	1.16516
1404	1.21407	1.18056
1405	1.22119	1.13821
1406	1.10347	1.17444
1407	1.12373	1.17092
1408	1.17862	1.10996
1409	1.20425	1.09498
1410	1.16969	1.16505
1411	1.14557	1.14164
1412	1.19583	1.13822
1413	1.20514	1.16509
1414	1.24784	1.1541
1415	1.21046	1.17024
1416	1.18197	1.16706
1417	1.2003	1.17207
1418	1.09763	1.19622
1419	1.15916	1.16041
1420	1.18758	1.13623
1421	1.22328	1.13201
1422	1.22175	1.13825
1423	1.24529	1.14699
1424	1.19861	1.17125
1425	1.27076	1.17876
1426	1.26883	1.15307
1427	1.25926	1.15301
1428	1.23696	1.12453
1429	1.19128	1.12807
1430	1.21226	1.13914
1431	1.19978	1.15228
1432	1.20562	1.19072
1433	1.22101	1.16353
1434	1.15481	1.14875
1435	1.25461	1.12292
1436	1.27269	1.13232
1437	1.202	1.15355
1438	1.19489	1.13448
1439	1.21264	1.17461
1440	1.09163	1.14877
1441	1.15557	1.13606
1442	1.0784	1.1319
1443	1.1518	1.16712
1444	1.1937	1.14339
1445	1.18701	1.15626
1446	1.12862	1.17867
1447	1.17027	1.18818
1448	1.13643	1.18494
1449	1.14384	1.19811
1450	1.19445	1.18466
1451	1.26462	1.13844
1452	1.25311	1.17073
1453	1.19009	1.15675
1454	1.07318	1.15247
1455	1.19198	1.14957
1456	1.23365	1.12756
1457	1.19532	1.13266
1458	1.17683	1.14133
1459	1.13066	1.16297
1460	1.19421	1.14814
1461	1.21126	1.15663
1462	1.11807	1.19094
1463	1.19847	1.20229
1464	1.22349	1.18047
1465	1.21915	1.1363
1466	1.18885	1.11668
1467	1.15666	1.14249
1468	1.16008	1.13423
1469	1.21596	1.13813
1470	1.14125	1.15185
1471	1.23273	1.13262
1472	1.11058	1.16517
1473	1.23511	1.15073
1474	1.228	1.19225
1475	1.23957	1.18935
1476	1.25403	1.23797
1477	1.22317	1.21617
1478	1.23915	1.18829
1479	1.20557	1.14303
1480	1.15312	1.13553
1481	1.20407	1.0662
1482	1.23354	1.11951
1483	1.19714	1.06807
1484	1.2381	1.07797
1485	1.25968	1.12299
1486	1.22328	1.1408
1487	1.20336	1.21057
1488	1.25099	1.20349
1489	1.18717	1.21475
1490	1.22712	1.18222
1491	1.25353	1.15629
1492	1.22275	1.16898
1493	1.16543	1.16548
1494	1.25718	1.11137
1495	1.21221	1.11726
1496	1.18591	1.08653
1497	1.20506	1.10399
1498	1.20019	1.11584
1499	1.24753	1.13368
1500	1.20149	1.19046
1501	1.24518	1.23838
1502	1.25698	1.202
1503	1.17016	1.23654
1504	1.23168	1.16307
1505	1.22726	1.14475
1506	1.23858	1.13615
1507	1.21344	1.11411
1508	1.22377	1.10163
1509	1.17321	1.09914
1510	1.24396	1.13284
1511	1.26059	1.13778
1512	1.26327	1.15257
1513	1.21712	1.23383
1514	1.23573	1.1692
1515	1.19669	1.17795
1516	1.19909	1.19761
1517	1.22596	1.17628
1518	1.21359	1.18577
1519	1.21599	1.18472
1520	1.22613	1.16775
1521	1.19578	1.1055
1522	1.1036	1.10011
1523	1.19763	1.0977
1524	1.13714	1.12027
1525	1.18004	1.11846
1526	1.1926	1.13152
1527	1.22496	1.14196
1528	1.13838	1.18107
1529	1.22899	1.21211
1530	1.22042	1.17606
1531	1.21515	1.1585
1532	1.25692	1.1525
1533	1.22926	1.13507
1534	1.23172	1.12318
1535	1.28201	1.10545
1536	1.25713	1.09779
1537	1.21331	1.10449
1538	1.17711	1.12272
1539	1.19601	1.15554
1540	1.10444	1.16646
1541	1.22399	1.14051
1542	1.07246	1.18945
1543	1.10267	1.18924
1544	1.19022	1.16495
1545	1.12857	1.20708
1546	1.21818	1.14158
1547	1.29165	1.15568
1548	1.31052	1.15162
1549	1.25708	1.11867
1550	1.21318	1.11985
1551	1.27621	1.1037
1552	1.16682	1.13232
1553	1.26228	1.1249
1554	1.21977	1.17459
1555	1.16503	1.15972
1556	1.11572	1.17092
1557	1.15377	1.17409
1558	1.19603	1.15535
1559	1.17264	1.13316
1560	1.05984	1.16644
1561	1.2551	1.14089
1562	1.2801	1.12241
1563	1.29125	1.11915
1564	1.30241	1.16026
1565	1.29486	1.16418
1566	1.30774	1.15095
1567	1.23196	1.15853
1568	1.21894	1.15142
1569	1.08271	1.21156
1570	1.18137	1.16678
1571	1.15206	1.13941
1572	1.24284	1.13444
1573	1.19964	1.14308
1574	1.26253	1.13527
1575	1.30681	1.13993
1576	1.27372	1.13974
1577	1.32281	1.14253
1578	1.2504	1.15231
1579	1.23316	1.155
1580	1.19255	1.15023
1581	1.25868	1.14723
1582	1.13241	1.15279
1583	1.17297	1.1377
1584	1.25606	1.1406
1585	1.23419	1.13147
1586	1.26608	1.14733
1587	1.2753	1.16911
1588	1.20368	1.15721
1589	1.25593	1.13557
1590	1.22054	1.13671
1591	1.22874	1.1086
1592	1.19694	1.12322
1593	0.883705	1.19047
1594	1.14541	1.15568
1595	1.14397	1.17863
1596	1.19835	1.16706
1597	1.1386	1.2119
1598	1.24862	1.20166
1599	1.29362	1.21806
1600	1.29566	1.18071
1601	1.32383	1.15388
1602	1.30875	1.14202
1603	1.18968	1.13376
1604	1.25183	1.13329
1605	1.17206	1.15227
1606	1.2326	1.11449
1607	1.13263	1.13193
1608	1.00487	1.1397
1609	1.17464	1.13339
1610	1.18918	1.13205
1611	1.21832	1.16881
1612	1.23417	1.16108
1613	1.25061	1.16731
1614	1.22367	1.15955
1615	1.23989	1.1456
1616	1.2197	1.12572
1617	1.20882	1.13873
1618	1.23231	1.11161
1619	1.21737	1.14186
1620	1.22345	1.16659
1621	1.2087	1.15141
1622	1.22663	1.14043
1623	1.19326	1.18798
1624	1.20889	1.13421
1625	1.22503	1.13658
1626	1.21525	1.11422
1627	1.19898	1.11487
1628	1.19136	1.12586
1629	1.17413	1.1252
1630	1.18057	1.13885
1631	1.06704	1.16723
1632	1.20983	1.15404
1633	1.25189	1.14654
1634	1.20733	1.16432
1635	1.26934	1.16409
1636	1.233	1.15572
1637	1.18661	1.16113
1638	1.1784	1.14315
1639	1.20757	1.13727
1640	1.17122	1.16701
1641	1.22541	1.12172
1642	1.22888	1.13761
1643	1.13962	1.1478
1644	1.24477	1.15246
1645	1.23911	1.12817
1646	1.24946	1.12989
1647	1.26484	1.11943
1648	1.16865	1.13914
1649	1.15886	1.15075
1650	1.11046	1.19601
1651	1.00691	1.18483
1652	1.13301	1.16103
1653	1.16342	1.16935
1654	1.23726	1.13934
1655	1.25589	1.1438
1656	1.25401	1.16319
1657	1.27483	1.14181
1658	1.19251	1.16272
1659	1.22798	1.13118
1660	1.25933	1.12533
1661	1.18625	1.13965
1662	1.20575	1.13211
1663	1.19374	1.11793
1664	1.08347	1.14781
1665	1.17876	1.1767
1666	1.19707	1.14157
1667	1.18161	1.179
1668	1.20947	1.14598
1669	1.20343	1.14221
1670	1.24798	1.1229
1671	1.27801	1.16498
1672	1.27111	1.13291
1673	1.28113	1.13796
1674	1.23963	1.12983
1675	1.1788	1.15271
1676	1.08716	1.13053
1677	1.13012	1.13817
1678	1.15759	1.1078
1679	1.11113	1.15538
1680	1.19077	1.12629
1681	1.19883	1.14508
1682	1.27197	1.1544
1683	1.21494	1.17193
1684	1.28738	1.14223
1685	1.3073	1.15288
1686	1.26267	1.18139
1687	1.29697	1.18016
1688	1.18637	1.22219
1689	1.22672	1.15847
1690	1.1119	1.17802
1691	1.17464	1.15195
1692	1.17336	1.14424
1693	1.12533	1.1258
1694	1.17413	1.1111
1695	1.15084	1.11894
1696	1.05106	1.14944
1697	1.13684	1.20024
1698	1.22473	1.15203
1699	1.2313	1.14398
1700	1.26407	1.12684
1701	1.19512	1.15051
1702	1.21548	1.15124
1703	1.22707	1.15289
1704	1.2482	1.14761
1705	1.20363	1.16885
1706	1.22876	1.16484
1707	1.19175	1.17806
1708	1.16515	1.17046
1709	1.18155	1.14443
1710	1.22015	1.14399
1711	1.12679	1.14428
1712	1.21175	1.14397
1713	1.26137	1.13066
1714	1.25411	1.12849
1715	1.22821	1.16043
1716	1.27401	1.17203
1717	1.19235	1.22474
1718	1.19988	1.16901
1719	1.21317	1.15756
1720	1.16726	1.15467
1721	1.19756	1.14689
1722	1.2225	1.13386
1723	1.21898	1.13278
1724	1.16269	1.15281
1725	1.25509	1.13319
1726	1.18587	1.16956
1727	1.28525	1.14471
1728	1.28104	1.14663
1729	1.28009	1.13989
1730	1.19157	1.14585
1731	1.2304	1.13975
1732	1.15877	1.13663
1733	1.19521	1.14402
1734	1.17296	1.14198
1735	1.15459	1.14684
1736	1.11438	1.14361
1737	1.19221	1.14973
1738	1.18232	1.16808
1739	1.11398	1.18345
1740	1.28721	1.13668
1741	1.30563	1.12263
1742	1.24349	1.12186
1743	0.928112	1.16384
1744	1.17158	1.10653
1745	1.17249	1.12302
1746	1.14804	1.12413
1747	1.13201	1.14057
1748	1.15707	1.15973
1749	1.05849	1.17607
1750	1.18345	1.16844
1751	1.21892	1.16487
1752	1.18943	1.20109
1753	1.31031	1.17112
1754	1.23048	1.16798
1755	1.30868	1.20295
1756	1.25998	1.12879
1757	1.19146	1.11024
1758	1.1982	1.08969
1759	1.14567	1.08504
1760	1.12806	1.13216
1761	1.12555	1.12875
1762	1.17986	1.14978
1763	1.21574	1.19495
1764	1.22644	1.15584
1765	1.17489	1.16627
1766	1.30101	1.14091
1767	1.1216	1.19966
1768	1.28603	1.15201
1769	1.21576	1.20858
1770	1.15893	1.1706
1771	1.16854	1.12099
1772	1.11321	1.14291
1773	1.15968	1.1486
1774	1.16243	1.15835
1775	1.20591	1.15193
1776	1.01862	1.18034
1777	1.27315	1.15286
1778	1.29167	1.1655
1779	1.06381	1.15196
1780	1.29059	1.16475
1781	1.17894	1.14068
1782	1.25414	1.13405
1783	1.25324	1.16066
1784	1.0996	1.16206
1785	1.21751	1.16315
1786	1.2148	1.14817
1787	1.18021	1.16095
1788	1.10339	1.17164
1789	1.23732	1.12649
1790	1.23892	1.14172
1791	1.18572	1.1896
1792	1.27748	1.1519
1793	1.26683	1.14963
1794	1.30095	1.19315
1795	1.29963	1.14564
1796	1.29243	1.16313
1797	1.20293	1.16057
1798	1.21689	1.15752
1799	1.14363	1.18304
1800	1.18287	1.1575
1801	1.14396	1.19758
1802	1.19377	1.1607
1803	1.20212	1.16336
1804	1.22789	1.1327
1805	1.25958	1.1326
1806	1.28017	1.12041
1807	1.25559	1.1297
1808	1.23926	1.1338
1809	1.24534	1.14091
1810	1.20188	1.18233
1811	1.17968	1.1694
1812	1.20015	1.15914
1813	1.20046	1.1817
1814	1.16732	1.17633
1815	1.06776	1.17773
1816	1.21519	1.15391
1817	1.15574	1.13524
1818	1.20426	1.09969
1819	1.17834	1.11454
1820	1.19752	1.13635
1821	1.1617	1.16929
1822	1.22882	1.14363
1823	1.23056	1.15029
1824	1.26277	1.14022
1825	1.23	1.14852
1826	1.24169	1.16788
1827	1.2562	1.13616
1828	1.22688	1.15657
1829	1.23331	1.16595
1830	1.21812	1.12339
1831	1.19011	1.13676
1832	1.15894	1.14429
1833	1.18486	1.12654
1834	1.21555	1.11326
1835	1.19061	1.112
1836	1.15915	1.1294
1837	1.10671	1.18582
1838	1.14406	1.16752
1839	1.24897	1.1206
1840	1.24494	1.12147
1841	1.12302	1.13559
1842	1.23068	1.13847
1843	1.21137	1.14703
1844	1.14407	1.18653
1845	1.23811	1.19279
1846	1.21666	1.20182
1847	1.23137	1.17668
1848	1.24132	1.14627
1849	1.08299	1.15399
1850	1.23908	1.114
1851	1.15585	1.13711
1852	1.23572	1.13457
1853	1.24195	1.15413
1854	1.26113	1.15434
1855	1.16111	1.16558
1856	1.19162	1.16904
1857	1.22131	1.1149
1858	1.19128	1.10885
1859	1.13777	1.16265
1860	1.21938	1.08563
1861	1.21374	1.10634
1862	1.25302	1.09784
1863	1.24777	1.14089
1864	1.28011	1.14243
1865	1.2757	1.15866
1866	1.28908	1.15508
1867	1.25511	1.15703
1868	1.2219	1.13709
1869	1.09486	1.15672
1870	1.19109	1.14521
1871	1.15623	1.11301
1872	1.09366	1.11394
1873	1.1875	1.11361
1874	1.11969	1.14532
1875	1.21003	1.1289
1876	1.22172	1.16832
1877	1.28427	1.16424
1878	1.27967	1.15561
1879	1.22383	1.16701
1880	1.23342	1.17193
1881	1.17055	1.18225
1882	1.11733	1.17419
1883	1.16802	1.15721
1884	1.20153	1.13354
1885	1.04356	1.17396
1886	1.17976	1.14704
1887	1.1175	1.12666
1888	1.16917	1.14163
1889	1.16184	1.19383
1890	1.08998	1.21458
1891	1.22989	1.21144
1892	1.25775	1.17674
1893	1.09653	1.17391
1894	1.23333	1.14226
1895	1.13898	1.11555
1896	1.22019	1.09631
1897	1.13781	1.09348
1898	1.08362	1.11668
1899	1.17296	1.1487
1900	1.22866	1.12736
1901	1.23912	1.18258
1902	1.26984	1.18672
1903	1.20841	1.19224
1904	1.19649	1.16761
1905	1.22927	1.14358
1906	1.19425	1.14592
1907	1.19009	1.1287
1908	1.23398	1.12624
1909	1.21399	1.14168
1910	1.25311	1.14093
1911	1.20272	1.13999
1912	0.952965	1.17734
1913	1.17813	1.14466
1914	1.11622	1.16033
1915	1.18185	1.14624
1916	1.15045	1.15521
1917	1.23059	1.15155
1918	1.28012	1.17557
1919	1.24446	1.13883
1920	1.27648	1.12459
1921	1.26956	1.13222
1922	1.29838	1.14316
1923	1.21948	1.15353
1924	1.19399	1.15768
1925	1.23224	1.12415
1926	1.20517	1.15682
1927	1.20777	1.12182
1928	1.25033	1.13475
1929	1.23989	1.16005
1930	1.21201	1.15754
1931	1.27242	1.13267
1932	1.29912	1.19354
1933	1.2289	1.14594
1934	1.21563	1.16611
1935	1.16669	1.20267
1936	1.2076	1.16302
1937	1.18555	1.16225
1938	1.19273	1.13736
1939	1.1779	1.15532
1940	1.15574	1.15173
1941	1.18969	1.16875
1942	1.09478	1.17896
1943	1.20525	1.14828
1944	1.2392	1.14064
1945	1.27112	1.15924
1946	1.23716	1.14153
1947	1.25459	1.15879
1948	1.24404	1.13096
1949	1.17609	1.14021
1950	1.04312	1.16758
1951	1.1945	1.1513
1952	1.21659	1.13274
1953	1.16887	1.17698
1954	1.03191	1.17138
1955	1.20673	1.16498
1956	1.23285	1.15111
1957	1.19945	1.15723
1958	1.20596	1.16715
1959	1.20018	1.15106
1960	1.17056	1.14861
1961	1.2317	1.12457
1962	1.20387	1.17095
1963	1.15487	1.15726
1964	1.19069	1.16992
1965	1.2474	1.11224
1966	1.15243	1.1446
1967	1.27162	1.17777
1968	1.26305	1.16193
1969	1.19637	1.19021
1970	1.16675	1.21744
1971	1.1412	1.17589
1972	1.24159	1.14852
1973	1.22223	1.14052
1974	1.27296	1.14284
1975	1.25484	1.12191
1976	1.27476	1.13802
1977	1.26158	1.1562
1978	1.23347	1.12661
1979	1.18675	1.1659
1980	1.09235	1.17527
1981	1.18042	1.15806
1982	1.14761	1.205
1983	1.19402	1.19024
1984	1.24937	1.15984
1985	1.24522	1.22132
1986	1.28724	1.15067
1987	1.24386	1.14448
1988	1.19585	1.1408
1989	1.1571	1.16698
1990	1.27178	1.12135
1991	1.24914	1.12519
1992	1.24195	1.13904
1993	1.21333	1.15407
1994	1.05615	1.17262
1995	1.19743	1.15428
1996	1.16404	1.13931
1997	1.21737	1.12258
1998	1.21083	1.09963
[truncated: 48,001 more rows]
