# Supplementary material
Source: ML conference proceedings conference paper supplement (https://openreview.net/forum?id=3MiADMHY62)
Supplement: supplementary_material [file Cartpole_vf_and_cf2.xlsx]

## Sheet: Sheet1
	vf	cf
0	0.0270373	-0.0251423
1	0.0518392	-0.00791894
2	0.0783157	0.00984373
3	0.106934	0.0296293
4	0.139357	0.0522556
5	0.172818	0.0786856
6	0.210437	0.105442
7	0.251518	0.135567
8	0.295712	0.167713
9	0.343168	0.203004
10	0.39594	0.241603
11	0.448038	0.286912
12	0.506332	0.33144
13	0.571883	0.377256
14	0.636381	0.430491
15	0.706542	0.486059
16	0.781453	0.542534
17	0.854282	0.606865
18	0.934676	0.669528
19	1.01641	0.736669
20	1.08806	0.816881
21	1.16644	0.890264
22	1.24295	0.957877
23	1.30868	1.03329
24	1.37352	1.10802
25	1.4301	1.17092
26	1.4724	1.23572
27	1.50348	1.29039
28	1.51767	1.34127
29	1.51309	1.36831
30	1.50916	1.39014
31	1.48828	1.39343
32	1.45689	1.40137
33	1.41746	1.40162
34	1.39351	1.37463
35	1.35169	1.34757
36	1.3124	1.31569
37	1.26517	1.28891
38	1.23815	1.24757
39	1.20277	1.21096
40	1.16617	1.18548
41	1.14344	1.14633
42	1.12295	1.11762
43	1.10414	1.09908
44	1.09102	1.08111
45	1.08125	1.06583
46	1.0896	1.05409
47	1.09002	1.05118
48	1.09027	1.05555
49	1.10767	1.06108
50	1.11763	1.06896
51	1.13857	1.07617
52	1.15169	1.08928
53	1.16422	1.1081
54	1.17922	1.12091
55	1.19424	1.13929
56	1.20857	1.15319
57	1.22372	1.15933
58	1.22921	1.16864
59	1.24332	1.17707
60	1.24905	1.18192
61	1.24707	1.19201
62	1.25915	1.19022
63	1.25758	1.19113
64	1.25308	1.19127
65	1.25315	1.18614
66	1.25364	1.1828
67	1.24066	1.17506
68	1.23995	1.16805
69	1.23065	1.16234
70	1.22885	1.15305
71	1.21874	1.14237
72	1.21499	1.1396
73	1.21033	1.13741
74	1.20482	1.14426
75	1.2014	1.14445
76	1.20522	1.14427
77	1.20772	1.14572
78	1.20765	1.14663
79	1.20472	1.15272
80	1.20393	1.14698
81	1.20182	1.14824
82	1.19932	1.14384
83	1.19718	1.14621
84	1.19347	1.14261
85	1.19233	1.14575
86	1.19605	1.14841
87	1.20179	1.14882
88	1.19842	1.15638
89	1.20639	1.1583
90	1.20339	1.16054
91	1.20805	1.16247
92	1.21163	1.15822
93	1.2093	1.16143
94	1.21247	1.16593
95	1.22065	1.16177
96	1.22221	1.16338
97	1.22741	1.16225
98	1.21696	1.16512
99	1.21933	1.16495
100	1.21789	1.16065
101	1.21418	1.15522
102	1.20832	1.15306
103	1.21112	1.14619
104	1.20401	1.14514
105	1.20756	1.14084
106	1.20531	1.14025
107	1.2031	1.13884
108	1.20691	1.13304
109	1.20746	1.13737
110	1.20207	1.13787
111	1.20983	1.13713
112	1.21155	1.14352
113	1.21082	1.14888
114	1.22232	1.15421
115	1.22468	1.15572
116	1.22696	1.15489
117	1.23046	1.15421
118	1.22789	1.15372
119	1.23027	1.15377
120	1.22585	1.15843
121	1.22607	1.15792
122	1.22541	1.1539
123	1.22403	1.15488
124	1.22099	1.1523
125	1.21336	1.1501
126	1.20812	1.15375
127	1.20909	1.15452
128	1.21385	1.15936
129	1.21035	1.16106
130	1.21336	1.16279
131	1.20884	1.16397
132	1.2094	1.16589
133	1.21961	1.1657
134	1.216	1.16858
135	1.2236	1.17818
136	1.22798	1.18297
137	1.23355	1.18029
138	1.22661	1.17543
139	1.22338	1.16672
140	1.2211	1.15857
141	1.22077	1.15665
142	1.21672	1.15257
143	1.21366	1.14897
144	1.22098	1.14743
145	1.21982	1.14649
146	1.21614	1.14209
147	1.2169	1.14111
148	1.22119	1.13798
149	1.22182	1.13348
150	1.22258	1.12949
151	1.22031	1.12523
152	1.21601	1.12384
153	1.21036	1.12347
154	1.20641	1.12784
155	1.20026	1.1309
156	1.20246	1.13307
157	1.20377	1.13704
158	1.19985	1.14006
159	1.20203	1.14765
160	1.21106	1.1585
161	1.20951	1.15937
162	1.21933	1.16665
163	1.22245	1.17039
164	1.22874	1.16899
165	1.2201	1.16326
166	1.22291	1.15891
167	1.22399	1.15468
168	1.21681	1.15105
169	1.21464	1.14748
170	1.21661	1.14279
171	1.21402	1.13905
172	1.21055	1.13714
173	1.20775	1.13254
174	1.20525	1.13327
175	1.20038	1.13411
176	1.20457	1.13724
177	1.20464	1.13814
178	1.20287	1.14671
179	1.21179	1.15171
180	1.21292	1.15739
181	1.22188	1.16511
182	1.22199	1.17053
183	1.22357	1.173
184	1.22291	1.17575
185	1.21763	1.16931
186	1.22173	1.16942
187	1.21753	1.16031
188	1.21363	1.15863
189	1.21005	1.1529
190	1.21064	1.15156
191	1.20327	1.14652
192	1.20122	1.14312
193	1.19997	1.14173
194	1.20591	1.13827
195	1.19594	1.13736
196	1.19494	1.13934
197	1.19464	1.14154
198	1.19925	1.14677
199	1.19924	1.14615
200	1.2028	1.15131
201	1.23687	1.15471
202	1.21668	1.15396
203	1.21694	1.15157
204	1.21211	1.14911
205	1.24203	1.13844
206	1.2288	1.1379
207	1.2024	1.13459
208	1.2029	1.13338
209	1.23598	1.13307
210	1.22241	1.1357
211	1.20149	1.13671
212	1.21012	1.14298
213	1.20494	1.14435
214	1.21845	1.15348
215	1.20028	1.15721
216	1.22288	1.1604
217	1.20634	1.16183
218	1.20744	1.16289
219	1.20298	1.16116
220	1.2092	1.15694
221	1.19889	1.15561
222	1.2034	1.15614
223	1.20505	1.14956
224	1.20281	1.14142
225	1.21102	1.13502
226	1.20806	1.12718
227	1.21301	1.12365
228	1.22084	1.12297
229	1.21878	1.12697
230	1.2347	1.12444
231	1.20366	1.13428
232	1.20201	1.13982
233	1.2033	1.14606
234	1.21721	1.14573
235	1.20051	1.15118
236	1.20332	1.14921
237	1.19658	1.15054
238	1.19173	1.14935
239	1.18779	1.14525
240	1.20511	1.14528
241	1.19345	1.14557
242	1.21552	1.14955
243	1.21082	1.15105
244	1.2124	1.15388
245	1.21647	1.15522
246	1.21587	1.15121
247	1.21525	1.15656
248	1.22147	1.15521
249	1.22845	1.15102
250	1.20717	1.16043
251	1.20351	1.16402
252	1.19984	1.16455
253	1.19233	1.16203
254	1.19066	1.15903
255	1.1886	1.15374
256	1.21113	1.15039
257	1.17951	1.14181
258	1.17776	1.14154
259	1.18139	1.13657
260	1.20162	1.13761
261	1.21998	1.13326
262	1.20856	1.134
263	1.22971	1.13715
264	1.23209	1.13566
265	1.24962	1.14453
266	1.23313	1.15154
267	1.23958	1.16479
268	1.23574	1.1718
269	1.22534	1.17186
270	1.21665	1.1739
271	1.21388	1.18038
272	1.21237	1.18145
273	1.22217	1.17755
274	1.19189	1.16799
275	1.17347	1.15387
276	1.17232	1.14797
277	1.15923	1.13707
278	1.16394	1.12804
279	1.16608	1.11729
280	1.17292	1.11488
281	1.18112	1.11507
282	1.19345	1.11836
283	1.21288	1.12378
284	1.19975	1.13043
285	1.20734	1.14108
286	1.22058	1.1539
287	1.22061	1.16503
288	1.22639	1.1702
289	1.21442	1.17396
290	1.20558	1.17239
291	1.19684	1.16235
292	1.19834	1.1618
293	1.19491	1.15876
294	1.19252	1.15438
295	1.19563	1.15044
296	1.21349	1.13932
297	1.21472	1.1392
298	1.20356	1.13739
299	1.21477	1.13708
300	1.21409	1.13787
301	1.21731	1.14019
302	1.22099	1.15339
303	1.22829	1.16462
304	1.21899	1.17298
305	1.20699	1.17827
306	1.19243	1.18025
307	1.19899	1.1843
308	1.19263	1.18044
309	1.17753	1.17046
310	1.17113	1.16733
311	1.18413	1.16087
312	1.20438	1.14903
313	1.19206	1.14182
314	1.20989	1.13262
315	1.21888	1.12406
316	1.20613	1.11924
317	1.21574	1.11671
318	1.1975	1.11934
319	1.19887	1.12798
320	1.18817	1.13984
321	1.17949	1.14822
322	1.18014	1.15743
323	1.18311	1.16016
324	1.1794	1.16257
325	1.19836	1.16487
326	1.20554	1.16338
327	1.24481	1.16155
328	1.22664	1.1559
329	1.2461	1.15455
330	1.24991	1.15589
331	1.25046	1.15659
332	1.24161	1.15428
333	1.23859	1.1534
334	1.21298	1.15022
335	1.20091	1.14584
336	1.19366	1.13798
337	1.17516	1.13783
338	1.18835	1.13477
339	1.17194	1.13578
340	1.16924	1.1366
341	1.17371	1.14232
342	1.22154	1.1534
343	1.19467	1.16428
344	1.21795	1.17569
345	1.23156	1.18155
346	1.23249	1.18321
347	1.21706	1.18317
348	1.21993	1.17895
349	1.20083	1.17438
350	1.21091	1.16634
351	1.22204	1.15896
352	1.2094	1.14583
353	1.23519	1.13185
354	1.23464	1.119
355	1.21981	1.10995
356	1.20074	1.10948
357	1.18728	1.1192
358	1.17653	1.13395
359	1.17295	1.15402
360	1.17826	1.17638
361	1.17918	1.19525
362	1.19979	1.20332
363	1.2327	1.20648
364	1.20702	1.19625
365	1.2156	1.18724
366	1.22305	1.17657
367	1.21669	1.16346
368	1.22026	1.14822
369	1.20371	1.1331
370	1.21211	1.12212
371	1.18971	1.11542
372	1.19683	1.11595
373	1.18527	1.11786
374	1.16579	1.12103
375	1.17384	1.12625
376	1.1893	1.13145
377	1.1925	1.13902
378	1.20662	1.14619
379	1.20474	1.15417
380	1.20238	1.16519
381	1.1969	1.1723
382	1.20314	1.18054
383	1.18172	1.18003
384	1.19911	1.17857
385	1.18702	1.16727
386	1.17746	1.15666
387	1.17746	1.14713
388	1.18794	1.1341
389	1.20771	1.12937
390	1.20739	1.1283
391	1.20874	1.13467
392	1.21652	1.1373
393	1.22206	1.14028
394	1.21043	1.14733
395	1.20877	1.15263
396	1.20683	1.15442
397	1.21008	1.16249
398	1.20755	1.16952
399	1.2201	1.17136
400	1.24212	1.17619
401	1.23363	1.17265
402	1.22659	1.17835
403	1.22061	1.17367
404	1.21405	1.17182
405	1.21595	1.16433
406	1.2056	1.16875
407	1.18949	1.16746
408	1.18986	1.16416
409	1.17977	1.15822
410	1.17462	1.15601
411	1.20567	1.15635
412	1.19761	1.14989
413	1.21225	1.14376
414	1.23497	1.13857
415	1.25332	1.13325
416	1.24876	1.13602
417	1.22661	1.13716
418	1.21024	1.14059
419	1.18806	1.14492
420	1.1869	1.14377
421	1.14547	1.14912
422	1.13669	1.14939
423	1.14069	1.15218
424	1.16117	1.153
425	1.19225	1.16154
426	1.21735	1.16092
427	1.23458	1.16148
428	1.25125	1.15966
429	1.26161	1.15789
430	1.2485	1.16125
431	1.23081	1.15729
432	1.22308	1.16358
433	1.2073	1.16611
434	1.18056	1.16692
435	1.17091	1.16614
436	1.16582	1.1621
437	1.16067	1.16649
438	1.18484	1.1705
439	1.18308	1.17088
440	1.20519	1.17097
441	1.23044	1.16749
442	1.23433	1.16315
443	1.23433	1.15642
444	1.22739	1.15083
445	1.20616	1.14162
446	1.20807	1.13304
447	1.17179	1.12856
448	1.14918	1.12965
449	1.14787	1.13488
450	1.15172	1.14606
451	1.15109	1.16488
452	1.20806	1.17971
453	1.22256	1.19115
454	1.24732	1.19173
455	1.24954	1.19231
456	1.23935	1.18543
457	1.2375	1.17787
458	1.23339	1.17144
459	1.22271	1.16059
460	1.18499	1.14745
461	1.1768	1.13316
462	1.15405	1.12375
463	1.15714	1.11567
464	1.16608	1.11266
465	1.17175	1.11725
466	1.19917	1.12524
467	1.21851	1.14195
468	1.23514	1.15759
469	1.24396	1.16968
470	1.23443	1.17776
471	1.23646	1.18324
472	1.21568	1.18217
473	1.23484	1.17591
474	1.21034	1.16909
475	1.19929	1.15877
476	1.18476	1.14498
477	1.1865	1.13181
478	1.18732	1.11679
479	1.19411	1.1118
480	1.19901	1.11008
481	1.2164	1.11981
482	1.24307	1.13176
483	1.24015	1.14151
484	1.25017	1.15487
485	1.2362	1.16314
486	1.25204	1.1757
487	1.22652	1.17364
488	1.22267	1.17638
489	1.23969	1.18932
490	1.23476	1.19323
491	1.24506	1.19778
492	1.25285	1.20088
493	1.20892	1.19556
494	1.21605	1.18297
495	1.21316	1.16924
496	1.19866	1.1616
497	1.21732	1.15248
498	1.20215	1.14123
499	1.2069	1.12668
500	1.19358	1.11718
501	1.17724	1.11641
502	1.17045	1.12032
503	1.17807	1.12664
504	1.16495	1.13418
505	1.2094	1.14004
506	1.21089	1.15256
507	1.23721	1.15771
508	1.23862	1.1661
509	1.25097	1.16572
510	1.20917	1.16473
511	1.1858	1.16186
512	1.17312	1.15406
513	1.15032	1.14542
514	1.15488	1.14104
515	1.14462	1.13453
516	1.1652	1.1323
517	1.17893	1.13609
518	1.19087	1.14192
519	1.20588	1.151
520	1.22611	1.15713
521	1.25606	1.16363
522	1.2365	1.16784
523	1.23318	1.1695
524	1.21478	1.17302
525	1.19682	1.16784
526	1.19616	1.16238
527	1.19025	1.1461
528	1.18949	1.13876
529	1.1881	1.12527
530	1.19794	1.11932
531	1.19873	1.11463
532	1.21403	1.11112
533	1.22759	1.11292
534	1.23635	1.11999
535	1.22991	1.13513
536	1.24551	1.14365
537	1.25223	1.15273
538	1.23507	1.15946
539	1.24395	1.16642
540	1.21022	1.1791
541	1.18419	1.17933
542	1.1596	1.18187
543	1.15749	1.17572
544	1.16436	1.16623
545	1.15978	1.15672
546	1.18107	1.14127
547	1.17107	1.13185
548	1.18666	1.11958
549	1.18854	1.11159
550	1.19077	1.11498
551	1.21972	1.11939
552	1.22357	1.13758
553	1.24075	1.14569
554	1.25211	1.15301
555	1.2435	1.16683
556	1.24686	1.16859
557	1.21703	1.17038
558	1.19697	1.16101
559	1.18447	1.1573
560	1.16425	1.14468
561	1.14771	1.13698
562	1.16443	1.12651
563	1.15447	1.12369
564	1.18738	1.11786
565	1.20359	1.11831
566	1.19587	1.1239
567	1.20116	1.12525
568	1.20245	1.13402
569	1.23196	1.14042
570	1.20419	1.15173
571	1.22565	1.15131
572	1.20896	1.16456
573	1.2282	1.16084
574	1.22708	1.16648
575	1.23078	1.17356
576	1.2242	1.17633
577	1.20719	1.16762
578	1.17859	1.16172
579	1.16595	1.15464
580	1.15324	1.14829
581	1.14783	1.14139
582	1.16	1.13305
583	1.15519	1.13581
584	1.16789	1.12884
585	1.1901	1.12619
586	1.20267	1.12675
587	1.205	1.13188
588	1.19135	1.14399
589	1.20664	1.15305
590	1.23241	1.15495
591	1.21621	1.16773
592	1.2074	1.17699
593	1.20913	1.18409
594	1.21312	1.18605
595	1.2201	1.1952
596	1.19787	1.19514
597	1.2072	1.18293
598	1.19869	1.17931
599	1.16598	1.15933
600	1.17569	1.14684
601	1.1784	1.13309
602	1.19066	1.12612
603	1.16814	1.12154
604	1.1693	1.12986
605	1.21997	1.12733
606	1.21541	1.13207
607	1.20977	1.13923
608	1.18934	1.14191
609	1.18775	1.1562
610	1.20429	1.14543
611	1.19046	1.14822
612	1.16909	1.14892
613	1.17263	1.15116
614	1.16385	1.1512
615	1.16821	1.14157
616	1.1847	1.13132
617	1.17502	1.13223
618	1.20266	1.12826
619	1.19778	1.12629
620	1.23656	1.12589
621	1.26217	1.12631
622	1.22958	1.13727
623	1.22943	1.14725
624	1.20667	1.15074
625	1.16058	1.15912
626	1.13936	1.1619
627	1.12424	1.15858
628	1.1179	1.15471
629	1.14089	1.14495
630	1.17376	1.13015
631	1.18226	1.12705
632	1.21397	1.12211
633	1.22249	1.1168
634	1.23005	1.11679
635	1.22424	1.12
636	1.2277	1.12628
637	1.22168	1.12969
638	1.21427	1.14202
639	1.20241	1.162
640	1.20102	1.16506
641	1.17973	1.16729
642	1.14769	1.17255
643	1.1391	1.1677
644	1.14533	1.16563
645	1.16417	1.1575
646	1.17626	1.15232
647	1.20221	1.14615
648	1.22198	1.13491
649	1.22303	1.12726
650	1.21489	1.12307
651	1.2133	1.12192
652	1.19943	1.13164
653	1.19038	1.14179
654	1.14247	1.14885
655	1.14768	1.15251
656	1.14895	1.15286
657	1.20287	1.1428
658	1.21933	1.15399
659	1.22266	1.1657
660	1.24765	1.16835
661	1.25523	1.17325
662	1.25699	1.16988
663	1.24242	1.16519
664	1.22148	1.15646
665	1.19508	1.14807
666	1.18393	1.13483
667	1.16948	1.13005
668	1.13079	1.13526
669	1.13189	1.1363
670	1.12094	1.15237
671	1.15557	1.15663
672	1.17094	1.15371
673	1.19493	1.16057
674	1.22828	1.16288
675	1.24796	1.16136
676	1.25491	1.15347
677	1.25981	1.14195
678	1.23542	1.14264
679	1.19324	1.13563
680	1.18395	1.13082
681	1.13318	1.14165
682	1.13696	1.13109
683	1.12305	1.13956
684	1.14106	1.15126
685	1.14293	1.16464
686	1.16845	1.1616
687	1.18804	1.16848
688	1.2304	1.16404
689	1.24111	1.16429
690	1.26092	1.16592
691	1.25415	1.17392
692	1.25728	1.16901
693	1.23648	1.1678
694	1.21269	1.16569
695	1.21664	1.15748
696	1.19874	1.14453
697	1.17551	1.14015
698	1.16459	1.13025
699	1.15474	1.12639
700	1.1613	1.11793
701	1.16329	1.11909
702	1.2	1.1239
703	1.20521	1.12945
704	1.21803	1.13935
705	1.25221	1.15072
706	1.26379	1.16861
707	1.25993	1.18613
708	1.27565	1.18318
709	1.25879	1.1776
710	1.2337	1.16341
711	1.20043	1.15552
712	1.17239	1.14644
713	1.16387	1.14682
714	1.15669	1.13955
715	1.15305	1.13865
716	1.16015	1.13652
717	1.17693	1.13738
718	1.18323	1.15368
719	1.20994	1.15721
720	1.23115	1.15322
721	1.2464	1.15171
722	1.25849	1.16168
723	1.22235	1.16757
724	1.2049	1.17414
725	1.21552	1.16672
726	1.15943	1.17555
727	1.14435	1.16114
728	1.13469	1.15265
729	1.11022	1.16173
730	1.1314	1.16107
731	1.14697	1.16032
732	1.16907	1.15464
733	1.17572	1.15843
734	1.22945	1.14441
735	1.22652	1.13741
736	1.24314	1.14657
737	1.24378	1.1423
738	1.24715	1.1548
739	1.23563	1.16389
740	1.2134	1.16675
741	1.18144	1.16159
742	1.16646	1.15685
743	1.14113	1.14631
744	1.12205	1.14241
745	1.15087	1.1394
746	1.15047	1.15907
747	1.17977	1.15513
748	1.23558	1.14477
749	1.25968	1.14336
750	1.26072	1.15372
751	1.26565	1.14359
752	1.26127	1.14359
753	1.24186	1.14683
754	1.21547	1.14996
755	1.19674	1.15085
756	1.17299	1.14543
757	1.1562	1.1445
758	1.15019	1.14126
759	1.16643	1.13298
760	1.17005	1.1332
761	1.17782	1.12459
762	1.16807	1.13568
763	1.19488	1.12721
764	1.24261	1.12689
765	1.22307	1.14168
766	1.21844	1.13975
767	1.21515	1.13814
768	1.20663	1.1391
769	1.18434	1.14365
770	1.17176	1.14265
771	1.13511	1.15208
772	1.14461	1.14922
773	1.18526	1.1437
774	1.14815	1.15708
775	1.16173	1.15781
776	1.17975	1.14927
777	1.19489	1.14719
778	1.18707	1.15447
779	1.22822	1.14896
780	1.26404	1.14381
781	1.26411	1.14791
782	1.28865	1.1527
783	1.28538	1.14351
784	1.24553	1.14589
785	1.24633	1.14109
786	1.20745	1.15838
787	1.18238	1.13973
788	1.1735	1.13615
789	1.17118	1.13974
790	1.13004	1.1498
791	1.17896	1.15511
792	1.16532	1.15046
793	1.21753	1.15134
794	1.21676	1.15946
795	1.25333	1.159
796	1.22331	1.16653
797	1.25823	1.15078
798	1.23232	1.14644
799	1.18979	1.14372
800	1.16947	1.12931
801	1.15889	1.13406
802	1.15043	1.14103
803	1.15477	1.13754
804	1.16978	1.14958
805	1.18305	1.15112
806	1.20702	1.15688
807	1.21907	1.16326
808	1.2244	1.16267
809	1.22163	1.16868
810	1.20846	1.1576
811	1.23493	1.15455
812	1.20647	1.14924
813	1.16873	1.1283
814	1.1501	1.12284
815	1.16416	1.12831
816	1.17063	1.12917
817	1.17432	1.13585
818	1.17441	1.14997
819	1.23303	1.17536
820	1.22784	1.17037
821	1.27723	1.17036
822	1.22629	1.16937
823	1.22374	1.16594
824	1.25586	1.14732
825	1.1298	1.14294
826	1.14958	1.13757
827	1.14153	1.12033
828	1.13261	1.13063
829	1.12797	1.12963
830	1.1358	1.14507
831	1.14874	1.15698
832	1.19504	1.17407
833	1.2343	1.18712
834	1.25074	1.18912
835	1.29619	1.19804
836	1.31333	1.19109
837	1.28767	1.17834
838	1.26292	1.17396
839	1.251	1.16082
840	1.20679	1.1614
841	1.18484	1.15108
842	1.16452	1.14942
843	1.16383	1.13418
844	1.1682	1.12203
845	1.18913	1.11963
846	1.20365	1.14135
847	1.2338	1.11996
848	1.2299	1.1275
849	1.23077	1.13718
850	1.21356	1.17102
851	1.1943	1.16588
852	1.20028	1.17195
853	1.16181	1.18794
854	1.18021	1.17752
855	1.18433	1.17625
856	1.18775	1.16295
857	1.17171	1.15923
858	1.18912	1.14438
859	1.22701	1.13165
860	1.22725	1.14218
861	1.23955	1.14077
862	1.24208	1.1623
863	1.24676	1.17686
864	1.25239	1.17354
865	1.22052	1.16896
866	1.18903	1.17579
867	1.15905	1.16008
868	1.1506	1.16597
869	1.16618	1.15136
870	1.14618	1.14776
871	1.18721	1.13828
872	1.1959	1.14697
873	1.21447	1.14141
874	1.20815	1.14987
875	1.23108	1.13596
876	1.22393	1.14705
877	1.1931	1.15004
878	1.18825	1.14905
879	1.1565	1.16393
880	1.17055	1.17425
881	1.18112	1.19222
882	1.18198	1.20467
883	1.18393	1.19617
884	1.22408	1.20934
885	1.24986	1.1765
886	1.2362	1.16112
887	1.27724	1.14551
888	1.28236	1.12997
889	1.27655	1.12616
890	1.21515	1.12809
891	1.243	1.12643
892	1.22483	1.1339
893	1.18806	1.15623
894	1.15876	1.16415
895	1.17744	1.17647
896	1.17727	1.17353
897	1.18287	1.19003
898	1.17603	1.19662
899	1.18918	1.19353
900	1.21049	1.17345
901	1.21539	1.16721
902	1.25152	1.15334
903	1.24234	1.15095
904	1.22481	1.12978
905	1.22331	1.14153
906	1.20782	1.1204
907	1.19304	1.1385
908	1.1841	1.13007
909	1.21038	1.14472
910	1.22885	1.14134
911	1.2233	1.15954
912	1.22982	1.16894
913	1.21958	1.1702
914	1.21169	1.16695
915	1.21345	1.17033
916	1.18482	1.17478
917	1.19704	1.16138
918	1.23242	1.18158
919	1.23582	1.15954
920	1.25904	1.16933
921	1.24632	1.14617
922	1.24115	1.14545
923	1.21585	1.13524
924	1.21886	1.13452
925	1.19846	1.13658
926	1.17951	1.14011
927	1.17493	1.13611
928	1.16869	1.1669
929	1.13608	1.16721
930	1.1332	1.17827
931	1.15495	1.19365
932	1.1421	1.18022
933	1.17453	1.17928
934	1.21316	1.16926
935	1.26047	1.1543
936	1.25381	1.14113
937	1.27143	1.13958
938	1.27448	1.14412
939	1.27799	1.15532
940	1.26709	1.14856
941	1.21548	1.1575
942	1.18996	1.17603
943	1.14194	1.16925
944	1.11285	1.17802
945	1.09666	1.1861
946	1.12181	1.18937
947	1.16173	1.18462
948	1.17928	1.16776
949	1.22339	1.16106
950	1.24887	1.1545
951	1.29084	1.14547
952	1.29809	1.15187
953	1.29692	1.13077
954	1.32095	1.14486
955	1.28744	1.14937
956	1.26985	1.13898
957	1.23238	1.14941
958	1.22371	1.16966
959	1.17882	1.17599
960	1.1734	1.17621
961	1.16584	1.17544
962	1.14239	1.15688
963	1.15938	1.15631
964	1.15288	1.13577
965	1.18011	1.13631
966	1.20822	1.13501
967	1.22022	1.15297
968	1.2462	1.14147
969	1.26011	1.14843
970	1.24995	1.16311
971	1.2613	1.1658
972	1.24534	1.18335
973	1.2145	1.19077
974	1.23318	1.17544
975	1.21616	1.16994
976	1.15556	1.14752
977	1.20289	1.11963
978	1.20971	1.10663
979	1.20679	1.09808
980	1.20459	1.11074
981	1.21457	1.12755
982	1.22807	1.1236
983	1.23621	1.13034
984	1.20366	1.15367
985	1.22923	1.16015
986	1.20631	1.16943
987	1.20683	1.19114
988	1.1846	1.196
989	1.20051	1.18602
990	1.1926	1.1906
991	1.18533	1.17739
992	1.21509	1.1714
993	1.21345	1.15812
994	1.18612	1.15368
995	1.17124	1.13132
996	1.18295	1.11389
997	1.16638	1.10924
998	1.18549	1.10948
999	1.19943	1.11287
1000	1.20428	1.14045
1001	1.19585	1.13846
1002	1.2226	1.14649
1003	1.19277	1.15345
1004	1.22522	1.17123
1005	1.24905	1.16457
1006	1.24531	1.16197
1007	1.2465	1.16452
1008	1.25096	1.17594
1009	1.24066	1.17138
1010	1.24079	1.15436
1011	1.20216	1.15277
1012	1.23481	1.15175
1013	1.1899	1.13633
1014	1.2249	1.12897
1015	1.23496	1.12318
1016	1.21704	1.13503
1017	1.21878	1.13565
1018	1.21242	1.1365
1019	1.21486	1.13377
1020	1.20861	1.14311
1021	1.20529	1.16089
1022	1.2096	1.18952
1023	1.21166	1.1666
1024	1.20558	1.17476
1025	1.22995	1.18423
1026	1.21486	1.15982
1027	1.21082	1.16219
1028	1.21935	1.16554
1029	1.20742	1.15245
1030	1.17397	1.14676
1031	1.16551	1.1307
1032	1.16372	1.12234
1033	1.16916	1.11921
1034	1.18576	1.13228
1035	1.21336	1.12547
1036	1.20643	1.14483
1037	1.2248	1.15295
1038	1.24734	1.17063
1039	1.25154	1.18033
1040	1.23081	1.18933
1041	1.22897	1.19527
1042	1.20979	1.2024
1043	1.20012	1.19142
1044	1.20233	1.17562
1045	1.17509	1.16285
1046	1.15783	1.14325
1047	1.1728	1.12295
1048	1.13861	1.09461
1049	1.14952	1.0992
1050	1.16162	1.10741
1051	1.18567	1.12464
1052	1.19148	1.14384
1053	1.20413	1.15308
1054	1.21514	1.16401
1055	1.22696	1.1732
1056	1.21658	1.18234
1057	1.20785	1.16865
1058	1.20615	1.15883
1059	1.18953	1.17586
1060	1.17147	1.16307
1061	1.184	1.14941
1062	1.17434	1.16557
1063	1.18652	1.15556
1064	1.18647	1.15731
1065	1.19938	1.14397
1066	1.20502	1.15424
1067	1.23286	1.15472
1068	1.24324	1.1346
1069	1.23767	1.15671
1070	1.26719	1.15618
1071	1.29444	1.1764
1072	1.27272	1.17238
1073	1.25252	1.15584
1074	1.24144	1.16084
1075	1.23288	1.14207
1076	1.19677	1.15767
1077	1.19424	1.13463
1078	1.1738	1.13662
1079	1.16086	1.1422
1080	1.16482	1.14226
1081	1.19742	1.13502
1082	1.18437	1.15025
1083	1.23227	1.16502
1084	1.24905	1.15547
1085	1.22342	1.17204
1086	1.20865	1.17039
1087	1.22849	1.18999
1088	1.21976	1.17196
1089	1.21934	1.16502
1090	1.23367	1.1667
1091	1.22858	1.15093
1092	1.23592	1.14529
1093	1.23219	1.14411
1094	1.24234	1.15376
1095	1.22725	1.15958
1096	1.21986	1.18353
1097	1.2159	1.18062
1098	1.20777	1.19431
1099	1.2105	1.18713
1100	1.21244	1.19054
1101	1.20835	1.159
1102	1.21414	1.1352
1103	1.26946	1.13185
1104	1.24119	1.11864
1105	1.22186	1.09926
1106	1.21831	1.13041
1107	1.20822	1.12123
1108	1.19977	1.15432
1109	1.16164	1.16421
1110	1.1763	1.16912
1111	1.16319	1.18149
1112	1.19047	1.19817
1113	1.21048	1.22432
1114	1.26521	1.19877
1115	1.26805	1.19489
1116	1.29964	1.15328
1117	1.31024	1.16696
1118	1.26551	1.13118
1119	1.25823	1.10519
1120	1.21947	1.12348
1121	1.18179	1.12253
1122	1.14167	1.14559
1123	1.11956	1.15118
1124	1.13766	1.17906
1125	1.13431	1.19416
1126	1.14667	1.21
1127	1.20128	1.20916
1128	1.22939	1.2153
1129	1.24776	1.17858
1130	1.27141	1.17511
1131	1.26801	1.16508
1132	1.27289	1.14724
1133	1.26702	1.12447
1134	1.2432	1.13047
1135	1.22672	1.13556
1136	1.22243	1.11487
1137	1.20479	1.12523
1138	1.19706	1.13948
1139	1.19724	1.16515
1140	1.17233	1.15179
1141	1.14249	1.17373
1142	1.178	1.16593
1143	1.17138	1.16518
1144	1.21136	1.15148
1145	1.22021	1.16528
1146	1.22741	1.16445
1147	1.23438	1.15492
1148	1.21832	1.15512
1149	1.22709	1.15104
1150	1.19831	1.15313
1151	1.23631	1.15378
1152	1.23478	1.15525
1153	1.20829	1.14936
1154	1.22382	1.15799
1155	1.19723	1.15529
1156	1.18798	1.16007
1157	1.19432	1.15151
1158	1.21237	1.13592
1159	1.1828	1.13601
1160	1.19224	1.14487
1161	1.19566	1.1347
1162	1.2067	1.15344
1163	1.21121	1.14787
1164	1.22678	1.14312
1165	1.23608	1.14243
1166	1.21705	1.1762
1167	1.21481	1.15884
1168	1.19995	1.16617
1169	1.20496	1.15649
1170	1.23228	1.16654
1171	1.18684	1.16761
1172	1.20446	1.16553
1173	1.2138	1.16879
1174	1.25374	1.16627
1175	1.21243	1.15168
1176	1.20784	1.16979
1177	1.15731	1.1606
1178	1.21686	1.1567
1179	1.20191	1.16221
1180	1.22452	1.18805
1181	1.21038	1.1661
1182	1.20764	1.16529
1183	1.21226	1.17238
1184	1.21889	1.14234
1185	1.23467	1.15562
1186	1.22516	1.14537
1187	1.23627	1.15264
1188	1.23072	1.18826
1189	1.23223	1.14769
1190	1.22065	1.14852
1191	1.19058	1.11702
1192	1.16568	1.12628
1193	1.16219	1.12411
1194	1.17956	1.13358
1195	1.20765	1.17654
1196	1.19518	1.19879
1197	1.18837	1.21954
1198	1.24047	1.2142
1199	1.22127	1.21148
1200	1.20594	1.19519
1201	1.19741	1.17255
1202	1.16905	1.14839
1203	1.15399	1.13391
1204	1.17295	1.12114
1205	1.17793	1.11186
1206	1.16714	1.11835
1207	1.21827	1.13036
1208	1.2013	1.13177
1209	1.18432	1.13438
1210	1.18653	1.15714
1211	1.19645	1.18376
1212	1.18356	1.1887
1213	1.18754	1.18217
1214	1.19157	1.16573
1215	1.18569	1.16664
1216	1.21173	1.14812
1217	1.23494	1.15017
1218	1.26744	1.15209
1219	1.25289	1.16769
1220	1.28492	1.18847
1221	1.28586	1.20328
1222	1.26668	1.19759
1223	1.26766	1.18196
1224	1.23231	1.15151
1225	1.17532	1.16849
1226	1.15739	1.14213
1227	1.13165	1.15774
1228	1.13767	1.1512
1229	1.11413	1.15026
1230	1.16164	1.14356
1231	1.1508	1.13752
1232	1.15135	1.14448
1233	1.15997	1.13502
1234	1.19423	1.13909
1235	1.21505	1.15385
1236	1.26078	1.15998
1237	1.27539	1.1823
1238	1.26397	1.184
1239	1.26667	1.16527
1240	1.25337	1.17684
1241	1.25947	1.15367
1242	1.24035	1.14196
1243	1.21448	1.14427
1244	1.1632	1.1422
1245	1.14305	1.14371
1246	1.13033	1.13494
1247	1.1082	1.16248
1248	1.12674	1.14336
1249	1.13181	1.14474
1250	1.15732	1.1461
1251	1.18272	1.1494
1252	1.21008	1.17207
1253	1.2094	1.15602
1254	1.23961	1.14375
1255	1.23332	1.156
1256	1.24898	1.14589
1257	1.23438	1.15218
1258	1.19912	1.16086
1259	1.18858	1.14177
1260	1.17416	1.17121
1261	1.18993	1.17217
1262	1.17688	1.17506
1263	1.19384	1.17189
1264	1.18784	1.18433
1265	1.16595	1.18784
1266	1.1697	1.17132
1267	1.18026	1.17884
1268	1.18463	1.13814
1269	1.21746	1.12476
1270	1.22994	1.13138
1271	1.2299	1.1427
1272	1.23462	1.16185
1273	1.24044	1.15458
1274	1.23236	1.15577
1275	1.22081	1.16656
1276	1.21678	1.18403
1277	1.20852	1.16214
1278	1.1932	1.16816
1279	1.18087	1.16408
1280	1.09669	1.16763
1281	1.15499	1.13205
1282	1.12948	1.13096
1283	1.13001	1.16277
1284	1.1061	1.1256
1285	1.16057	1.13949
1286	1.13381	1.14868
1287	1.14826	1.15425
1288	1.17558	1.16418
1289	1.1989	1.1805
1290	1.22536	1.17054
1291	1.25375	1.17313
1292	1.24093	1.18212
1293	1.24868	1.19463
1294	1.25062	1.17685
1295	1.24783	1.18183
1296	1.25287	1.15418
1297	1.25419	1.13135
1298	1.22509	1.12528
1299	1.20621	1.12701
1300	1.21677	1.1233
1301	1.19926	1.14643
1302	1.18963	1.14586
1303	1.17998	1.16387
1304	1.15013	1.17969
1305	1.13716	1.18176
1306	1.10791	1.18566
1307	1.14895	1.17935
1308	1.12591	1.17767
1309	1.14273	1.17521
1310	1.17995	1.16318
1311	1.21148	1.14939
1312	1.22815	1.13941
1313	1.21896	1.14908
1314	1.24451	1.11607
1315	1.2488	1.13249
1316	1.24954	1.13984
1317	1.25797	1.13944
1318	1.24902	1.16895
1319	1.23319	1.16169
1320	1.21166	1.17498
1321	1.19229	1.17462
1322	1.15386	1.16433
1323	1.1491	1.1678
1324	1.1312	1.14403
1325	1.12108	1.13709
1326	1.15074	1.1415
1327	1.15821	1.14206
1328	1.18156	1.15365
1329	1.21557	1.16963
1330	1.25578	1.16947
1331	1.2708	1.17536
1332	1.28814	1.17708
1333	1.30316	1.17147
1334	1.28203	1.15659
1335	1.2607	1.14995
1336	1.21562	1.15331
1337	1.17578	1.15434
1338	1.14526	1.1645
1339	1.11268	1.15782
1340	1.09719	1.16733
1341	1.09032	1.17513
1342	1.11916	1.15897
1343	1.1563	1.1707
1344	1.17746	1.13636
1345	1.19428	1.13483
1346	1.22439	1.14007
1347	1.22694	1.14435
1348	1.25036	1.13993
1349	1.26886	1.14093
1350	1.26652	1.16348
1351	1.24431	1.16376
1352	1.23235	1.18458
1353	1.21975	1.17286
1354	1.21257	1.1649
1355	1.18362	1.16289
1356	1.19981	1.14404
1357	1.18236	1.14093
1358	1.17488	1.15063
1359	1.15588	1.16368
1360	1.1727	1.14404
1361	1.17592	1.16058
1362	1.20085	1.15019
1363	1.21998	1.1627
1364	1.19138	1.1621
1365	1.21688	1.15454
1366	1.19358	1.15714
1367	1.20124	1.15054
1368	1.09567	1.16345
1369	1.19212	1.13536
1370	1.15818	1.1416
1371	1.1552	1.14243
1372	1.13901	1.16258
1373	1.17919	1.1632
1374	1.18144	1.18717
1375	1.20873	1.1833
1376	1.23207	1.16659
1377	1.2494	1.15513
1378	1.26006	1.14434
1379	1.23844	1.14168
1380	1.22475	1.12727
1381	1.231	1.13503
1382	1.18869	1.15524
1383	1.18856	1.1555
1384	1.17198	1.16158
1385	1.15142	1.16704
1386	1.16784	1.15294
1387	1.15241	1.14803
1388	1.16541	1.14419
1389	1.18145	1.14132
1390	1.17714	1.14693
1391	1.20373	1.1541
1392	1.20319	1.16798
1393	1.25646	1.16613
1394	1.21788	1.17625
1395	1.19771	1.19936
1396	1.23588	1.19723
1397	1.21955	1.16679
1398	1.17975	1.15694
1399	1.16297	1.13688
1400	1.16559	1.11677
1401	1.14177	1.11553
1402	1.14372	1.11509
1403	1.14853	1.12084
1404	1.17716	1.11293
1405	1.19712	1.13141
1406	1.2204	1.14068
1407	1.24349	1.14887
1408	1.25016	1.18619
1409	1.26323	1.17889
1410	1.23586	1.17268
1411	1.21152	1.17386
1412	1.16855	1.17148
1413	1.16952	1.12963
1414	1.14268	1.12063
1415	1.12737	1.11456
1416	1.07899	1.12391
1417	1.16232	1.11782
1418	1.17029	1.1367
1419	1.16311	1.15555
1420	1.1886	1.15976
1421	1.21839	1.1626
1422	1.24478	1.17858
1423	1.21103	1.18858
1424	1.21412	1.16546
1425	1.22226	1.16681
1426	1.20994	1.15798
1427	1.20557	1.13996
1428	1.18726	1.15943
1429	1.18963	1.15624
1430	1.20029	1.15811
1431	1.22846	1.17261
1432	1.19135	1.19446
1433	1.23068	1.18309
1434	1.21587	1.17104
1435	1.21855	1.16063
1436	1.22494	1.13822
1437	1.24592	1.14826
1438	1.24221	1.14359
1439	1.2194	1.16752
1440	1.23904	1.16321
1441	1.22151	1.16053
1442	1.21672	1.15698
1443	1.20202	1.16711
1444	1.21102	1.15917
1445	1.17989	1.15493
1446	1.18016	1.17316
1447	1.16719	1.16714
1448	1.17578	1.14218
1449	1.18059	1.14675
1450	1.18371	1.12436
1451	1.19896	1.12835
1452	1.22041	1.15504
1453	1.24719	1.14446
1454	1.25939	1.16118
1455	1.27057	1.17023
1456	1.28312	1.18554
1457	1.23646	1.18311
1458	1.25135	1.16909
1459	1.21882	1.1708
1460	1.18905	1.17282
1461	1.18029	1.16456
1462	1.16941	1.16916
1463	1.15141	1.15294
1464	1.13814	1.15991
1465	1.16322	1.15833
1466	1.17734	1.1715
1467	1.18619	1.1832
1468	1.21814	1.18487
1469	1.21205	1.20137
1470	1.24756	1.17567
1471	1.25391	1.17506
1472	1.2568	1.13562
1473	1.25022	1.14887
1474	1.23843	1.13764
1475	1.19999	1.14425
1476	1.19888	1.14933
1477	1.18514	1.16753
1478	1.20719	1.18003
1479	1.14723	1.19058
1480	1.15421	1.16979
1481	1.1926	1.17547
1482	1.18681	1.15343
1483	1.19912	1.1481
1484	1.20127	1.12822
1485	1.19339	1.13058
1486	1.2253	1.14022
1487	1.21638	1.13539
1488	1.17691	1.14622
1489	1.21971	1.13916
1490	1.20507	1.14269
1491	1.19692	1.14841
1492	1.16675	1.16516
1493	1.20218	1.15197
1494	1.1843	1.1486
1495	1.16034	1.16319
1496	1.1752	1.15703
1497	1.19105	1.15381
1498	1.1922	1.14959
1499	1.20026	1.14439
1500	1.20336	1.14442
1501	1.20539	1.13593
1502	1.19909	1.15261
1503	1.1896	1.14541
1504	1.18028	1.13528
1505	1.17898	1.13233
1506	1.15232	1.14331
1507	1.11198	1.15313
1508	1.17687	1.16277
1509	1.17569	1.1646
1510	1.11401	1.1863
1511	1.19352	1.18018
1512	1.16143	1.186
1513	1.09922	1.17107
1514	1.19478	1.1393
1515	1.14774	1.13346
1516	1.17516	1.11403
1517	1.17708	1.1118
1518	1.13505	1.11776
1519	1.1899	1.1119
1520	1.18765	1.13026
1521	1.1721	1.1568
1522	1.171	1.17152
1523	1.20184	1.17537
1524	1.23793	1.19504
1525	1.19774	1.17831
1526	1.24004	1.1476
1527	1.20539	1.14332
1528	1.21432	1.14145
1529	1.24607	1.12401
1530	1.21301	1.12844
1531	1.21685	1.12307
1532	1.23686	1.13229
1533	1.21083	1.15468
1534	1.20991	1.17542
1535	1.16782	1.18822
1536	1.19141	1.18955
1537	1.16652	1.17666
1538	1.17294	1.16273
1539	1.16301	1.15059
1540	1.14684	1.14906
1541	1.15513	1.13571
1542	1.15504	1.13893
1543	1.17625	1.12797
1544	1.1857	1.13109
1545	1.20481	1.14906
1546	1.21972	1.1375
1547	1.23888	1.15002
1548	1.25248	1.14163
1549	1.26175	1.14063
1550	1.2577	1.15759
1551	1.25548	1.15411
1552	1.22673	1.16478
1553	1.20925	1.17908
1554	1.1992	1.16363
1555	1.13956	1.15984
1556	1.15507	1.15618
1557	1.12996	1.12797
1558	1.1335	1.12999
1559	1.107	1.14533
1560	1.13841	1.14284
1561	1.14732	1.16583
1562	1.17326	1.16263
1563	1.20267	1.18072
1564	1.23224	1.17968
1565	1.22316	1.19982
1566	1.2708	1.17851
1567	1.25979	1.17988
1568	1.27176	1.16411
1569	1.25634	1.1601
1570	1.25378	1.13773
1571	1.24103	1.14207
1572	1.21509	1.13992
1573	1.18348	1.14805
1574	1.18274	1.1336
1575	1.15119	1.16895
1576	1.15938	1.14341
1577	1.11716	1.1595
1578	1.17406	1.15947
1579	1.17236	1.17918
1580	1.22112	1.20196
1581	1.20229	1.17074
1582	1.18649	1.17759
1583	1.18834	1.15606
1584	1.18194	1.13694
1585	1.11873	1.13284
1586	1.17079	1.10818
1587	1.1136	1.12115
1588	1.15228	1.11241
1589	1.1508	1.13451
1590	1.18537	1.14029
1591	1.18749	1.16731
1592	1.16582	1.17959
1593	1.21076	1.17121
1594	1.21545	1.17959
1595	1.22047	1.18001
1596	1.2325	1.1579
1597	1.21279	1.14134
1598	1.20216	1.15038
1599	1.21144	1.12679
1600	1.19866	1.1324
1601	1.19443	1.1269
1602	1.21514	1.12831
1603	1.21334	1.13109
1604	1.22521	1.14917
1605	1.2078	1.15187
1606	1.20955	1.15168
1607	1.20106	1.156
1608	1.16007	1.18264
1609	1.17777	1.16754
1610	1.16975	1.15673
1611	1.15418	1.15887
1612	1.15903	1.15335
1613	1.16727	1.17394
1614	1.16093	1.1577
1615	1.17415	1.17824
1616	1.20083	1.17548
1617	1.22388	1.18219
1618	1.23155	1.20262
1619	1.25462	1.24295
1620	1.26996	1.24789
1621	1.24826	1.25873
1622	1.25106	1.2197
1623	1.24437	1.16379
1624	1.20135	1.13249
1625	1.20498	1.07853
1626	1.17753	1.06863
1627	1.14807	1.05727
1628	1.09353	1.08824
1629	1.14459	1.09171
1630	1.13362	1.14648
1631	1.16831	1.16676
1632	1.14177	1.20703
1633	1.17546	1.2176
1634	1.22649	1.20999
1635	1.24962	1.18909
1636	1.25451	1.17729
1637	1.22881	1.15979
1638	1.219	1.14758
1639	1.2349	1.12222
1640	1.21006	1.13325
1641	1.18408	1.14819
1642	1.13424	1.1611
1643	1.15011	1.14869
1644	1.13825	1.14449
1645	1.14293	1.14845
1646	1.13804	1.14606
1647	1.16387	1.13801
1648	1.16661	1.1411
1649	1.18758	1.15678
1650	1.21366	1.17509
1651	1.24071	1.17538
1652	1.26505	1.16856
1653	1.27317	1.17258
1654	1.26502	1.16919
1655	1.25489	1.16435
1656	1.2399	1.15012
1657	1.21191	1.14984
1658	1.13452	1.16756
1659	1.16395	1.15775
1660	1.11516	1.15145
1661	1.08693	1.14189
1662	1.11295	1.13335
1663	1.10516	1.14812
1664	1.16663	1.16363
1665	1.19326	1.15456
1666	1.19858	1.17916
1667	1.21214	1.16765
1668	1.23559	1.17139
1669	1.24216	1.17576
1670	1.23602	1.17549
1671	1.24208	1.13946
1672	1.22143	1.13805
1673	1.20725	1.13302
1674	1.19289	1.10463
1675	1.1839	1.12274
1676	1.14985	1.14787
1677	1.14827	1.14503
1678	1.14955	1.18979
1679	1.16026	1.19352
1680	1.18314	1.2065
1681	1.2	1.20382
1682	1.21661	1.20439
1683	1.23178	1.17944
1684	1.24967	1.15555
1685	1.26589	1.1376
1686	1.27117	1.12139
1687	1.28053	1.111
1688	1.25773	1.11786
1689	1.23025	1.13181
1690	1.21168	1.12162
1691	1.20528	1.14428
1692	1.18099	1.16215
1693	1.17801	1.17574
1694	1.17754	1.19509
1695	1.16618	1.18548
1696	1.17213	1.18732
1697	1.18081	1.1757
1698	1.21042	1.14395
1699	1.21834	1.12896
1700	1.22394	1.11411
1701	1.21927	1.1079
1702	1.20049	1.11635
1703	1.20044	1.11754
1704	1.18821	1.12885
1705	1.19201	1.13565
1706	1.16009	1.17024
1707	1.18461	1.18771
1708	1.16399	1.19398
1709	1.1866	1.19122
1710	1.18279	1.18426
1711	1.19599	1.18772
1712	1.23928	1.17483
1713	1.20447	1.16969
1714	1.21887	1.14618
1715	1.23255	1.13245
1716	1.2	1.12797
1717	1.19114	1.11708
1718	1.19617	1.13961
1719	1.17886	1.1313
1720	1.19378	1.13998
1721	1.17382	1.15633
1722	1.19299	1.17435
1723	1.18045	1.17714
1724	1.20063	1.16931
1725	1.2019	1.16738
1726	1.21014	1.18283
1727	1.22167	1.14271
1728	1.21673	1.15563
1729	1.22063	1.13434
1730	1.20426	1.13967
1731	1.20787	1.14101
1732	1.19531	1.15652
1733	1.21676	1.16325
1734	1.20834	1.16739
1735	1.21568	1.19087
1736	1.17365	1.20458
1737	1.17376	1.19338
1738	1.21988	1.17248
1739	1.19183	1.16044
1740	1.17673	1.1587
1741	1.18076	1.13435
1742	1.1942	1.136
1743	1.17001	1.12667
1744	1.18415	1.12646
1745	1.17192	1.15495
1746	1.19471	1.13009
1747	1.20905	1.14149
1748	1.21845	1.15769
1749	1.2158	1.1761
1750	1.22921	1.17728
1751	1.22748	1.18103
1752	1.20455	1.19852
1753	1.23971	1.18033
1754	1.23491	1.17626
1755	1.23679	1.15369
1756	1.22881	1.14962
1757	1.22777	1.15486
1758	1.2032	1.15139
1759	1.20478	1.15276
1760	1.17637	1.16061
1761	1.17208	1.13954
1762	1.15889	1.13869
1763	1.15222	1.14546
1764	1.13377	1.1697
1765	1.15254	1.1505
1766	1.15528	1.1781
1767	1.16018	1.20564
1768	1.20335	1.17972
1769	1.2017	1.17993
1770	1.21989	1.162
1771	1.21839	1.16258
1772	1.25248	1.14026
1773	1.27337	1.13661
1774	1.23058	1.14528
1775	1.21771	1.14122
1776	1.20612	1.15403
1777	1.18893	1.14561
1778	1.19852	1.16394
1779	1.18424	1.15091
1780	1.15969	1.1701
1781	1.17713	1.17058
1782	1.15904	1.18115
1783	1.16426	1.1754
1784	1.16415	1.17226
1785	1.16899	1.15726
1786	1.1842	1.16837
1787	1.20722	1.12339
1788	1.19772	1.12007
1789	1.20743	1.12619
1790	1.21347	1.15085
1791	1.21633	1.14834
1792	1.23541	1.18268
1793	1.22002	1.1654
1794	1.21205	1.17345
1795	1.16249	1.18259
1796	1.21823	1.1742
1797	1.1819	1.18349
1798	1.19795	1.17445
1799	1.19421	1.17385
1800	1.18257	1.17754
1801	1.18505	1.17188
1802	1.19543	1.16398
1803	1.17318	1.14673
1804	1.20422	1.13594
1805	1.14369	1.1384
1806	1.17968	1.12619
1807	1.18097	1.13068
1808	1.20307	1.13268
1809	1.21132	1.13692
1810	1.22011	1.16112
1811	1.20324	1.17783
1812	1.19694	1.18462
1813	1.20577	1.16653
1814	1.20131	1.14472
1815	1.18702	1.12833
1816	1.20412	1.1239
1817	1.17802	1.12327
1818	1.18733	1.12343
1819	1.18744	1.15428
1820	1.18725	1.14375
1821	1.19828	1.15347
1822	1.18891	1.16428
1823	1.19424	1.17113
1824	1.18674	1.18413
1825	1.21308	1.16013
1826	1.21696	1.18914
1827	1.20944	1.16644
1828	1.22487	1.1549
1829	1.23022	1.15067
1830	1.20403	1.1274
1831	1.2199	1.13621
1832	1.1695	1.14919
1833	1.1835	1.15743
1834	1.18261	1.17809
1835	1.19821	1.17927
1836	1.18745	1.19643
1837	1.17236	1.19341
1838	1.22091	1.16862
1839	1.20293	1.16895
1840	1.21736	1.15462
1841	1.20877	1.13999
1842	1.2314	1.15415
1843	1.21849	1.12947
1844	1.20509	1.13269
1845	1.1875	1.13232
1846	1.15799	1.14466
1847	1.16966	1.14284
1848	1.16443	1.14975
1849	1.15905	1.17169
1850	1.20131	1.20023
1851	1.19828	1.22062
1852	1.20641	1.2387
1853	1.19926	1.21818
1854	1.21056	1.19779
1855	1.21372	1.15746
1856	1.20113	1.13312
1857	1.18697	1.10619
1858	1.16342	1.12923
1859	1.17941	1.10734
1860	1.19606	1.11622
1861	1.19099	1.13913
1862	1.21852	1.1232
1863	1.2316	1.16587
1864	1.23352	1.15605
1865	1.23746	1.16166
1866	1.25948	1.16495
1867	1.25703	1.17941
1868	1.24237	1.17107
1869	1.21643	1.16407
1870	1.20605	1.15058
1871	1.21435	1.164
1872	1.19622	1.18043
1873	1.18458	1.16921
1874	1.18511	1.1677
1875	1.19698	1.18763
1876	1.195	1.18706
1877	1.20601	1.18865
1878	1.22479	1.18169
1879	1.21178	1.18074
1880	1.21705	1.15946
1881	1.2141	1.15042
1882	1.20414	1.1267
1883	1.19109	1.13579
1884	1.19489	1.10127
1885	1.19881	1.13051
1886	1.17257	1.1286
1887	1.17307	1.13922
1888	1.18191	1.14485
1889	1.19573	1.15774
1890	1.20881	1.14602
1891	1.20036	1.16072
1892	1.20091	1.16094
1893	1.2275	1.15326
1894	1.2423	1.14606
1895	1.26073	1.1365
1896	1.24827	1.13315
1897	1.21639	1.1387
1898	1.17919	1.14495
1899	1.17886	1.16038
1900	1.15671	1.15863
1901	1.14869	1.16658
1902	1.16313	1.16365
1903	1.17392	1.16184
1904	1.1862	1.15304
1905	1.1919	1.1506
1906	1.23872	1.12575
1907	1.23705	1.12694
1908	1.25504	1.10769
1909	1.27158	1.11249
1910	1.27009	1.12
1911	1.26916	1.1382
1912	1.25319	1.1644
1913	1.25619	1.19152
1914	1.18202	1.21393
1915	1.19987	1.19395
1916	1.18223	1.17871
1917	1.18474	1.18768
1918	1.13538	1.14984
1919	1.13875	1.13955
1920	1.1077	1.11536
1921	1.12678	1.10421
1922	1.12067	1.11171
1923	1.14177	1.10175
1924	1.16106	1.13361
1925	1.19718	1.13982
1926	1.22879	1.16114
1927	1.25775	1.1696
1928	1.26104	1.18482
1929	1.2747	1.19668
1930	1.27338	1.19324
1931	1.22934	1.19099
1932	1.25859	1.15062
1933	1.23558	1.13894
1934	1.22733	1.13849
1935	1.19005	1.14172
1936	1.18385	1.13275
1937	1.18382	1.13412
1938	1.17694	1.13157
1939	1.16509	1.14564
1940	1.18018	1.14449
1941	1.16139	1.16352
1942	1.17832	1.14514
1943	1.22049	1.15375
1944	1.23587	1.15834
1945	1.23826	1.16577
1946	1.26129	1.20243
1947	1.27554	1.19172
1948	1.26326	1.20205
1949	1.25496	1.19093
1950	1.24124	1.16638
1951	1.2159	1.14607
1952	1.19168	1.1362
1953	1.17883	1.12453
1954	1.15481	1.11801
1955	1.15293	1.10914
1956	1.14405	1.13373
1957	1.16879	1.12782
1958	1.18199	1.16655
1959	1.20573	1.16583
1960	1.21687	1.16353
1961	1.24311	1.16771
1962	1.25663	1.16459
1963	1.26441	1.1649
1964	1.25546	1.16113
1965	1.24213	1.16042
1966	1.22891	1.1475
1967	1.20236	1.14125
1968	1.17497	1.1289
1969	1.14459	1.15662
1970	1.15445	1.14282
1971	1.13828	1.16569
1972	1.16127	1.16517
1973	1.18796	1.18486
1974	1.19964	1.18796
1975	1.22813	1.21235
1976	1.2348	1.18218
1977	1.2644	1.1721
1978	1.25461	1.14742
1979	1.2289	1.1389
1980	1.21433	1.12643
1981	1.19347	1.15347
1982	1.19626	1.12253
1983	1.19429	1.12497
1984	1.18961	1.14645
1985	1.18728	1.1583
1986	1.18574	1.16657
1987	1.22187	1.16833
1988	1.17094	1.17941
1989	1.19372	1.16907
1990	1.19064	1.1836
1991	1.18825	1.15149
1992	1.18403	1.17869
1993	1.17196	1.15552
1994	1.17571	1.13495
1995	1.177	1.13232
1996	1.1696	1.13834
1997	1.1663	1.17692
1998	1.18774	1.16821
[truncated: 8,001 more rows]
