# Supplementary material
Source: ML conference proceedings conference paper supplement (https://openreview.net/forum?id=3MiADMHY62)

# Constraint function

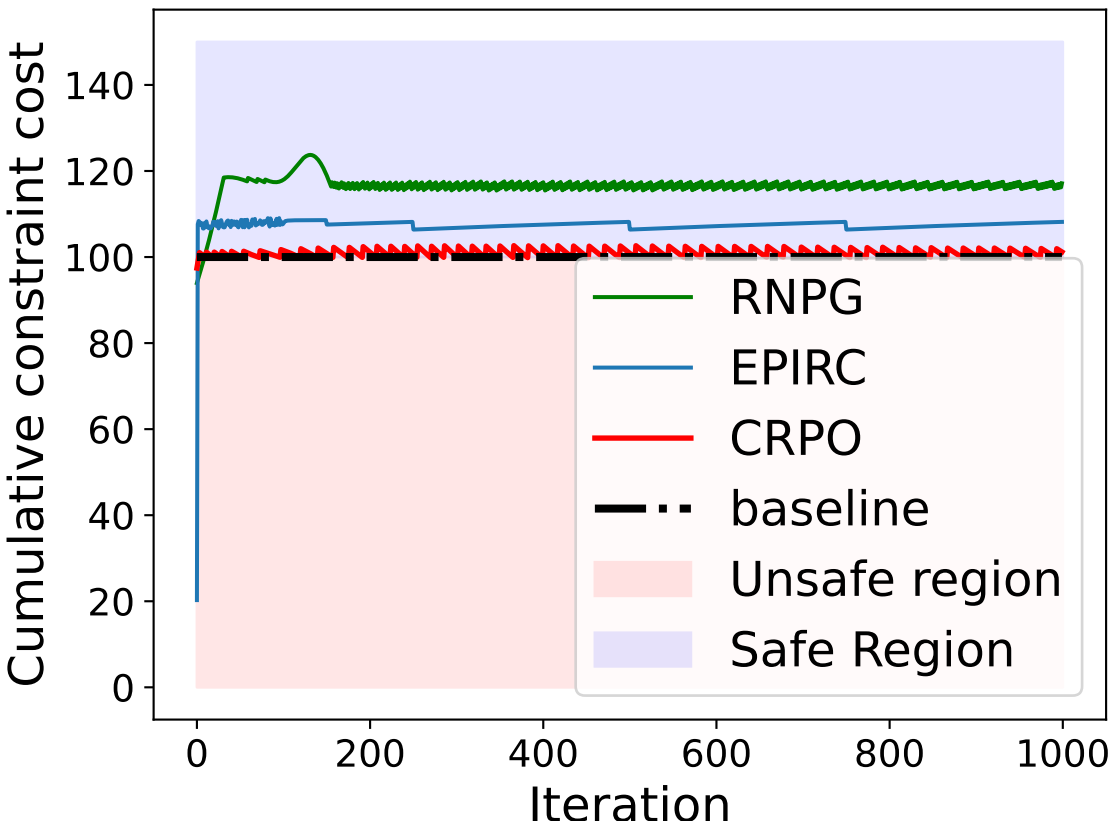

Supplement: supplementary_material [file CF_update_Garnet_with_CRPO.pdf › RNPG-main/After_rebuttal_questions/RNPG/CF_update_Garnet_with_CRPO.pdf]
