# Supplementary material
Source: ML conference proceedings conference paper supplement (https://openreview.net/forum?id=3MiADMHY62)

Constraint function (Garbage collector)

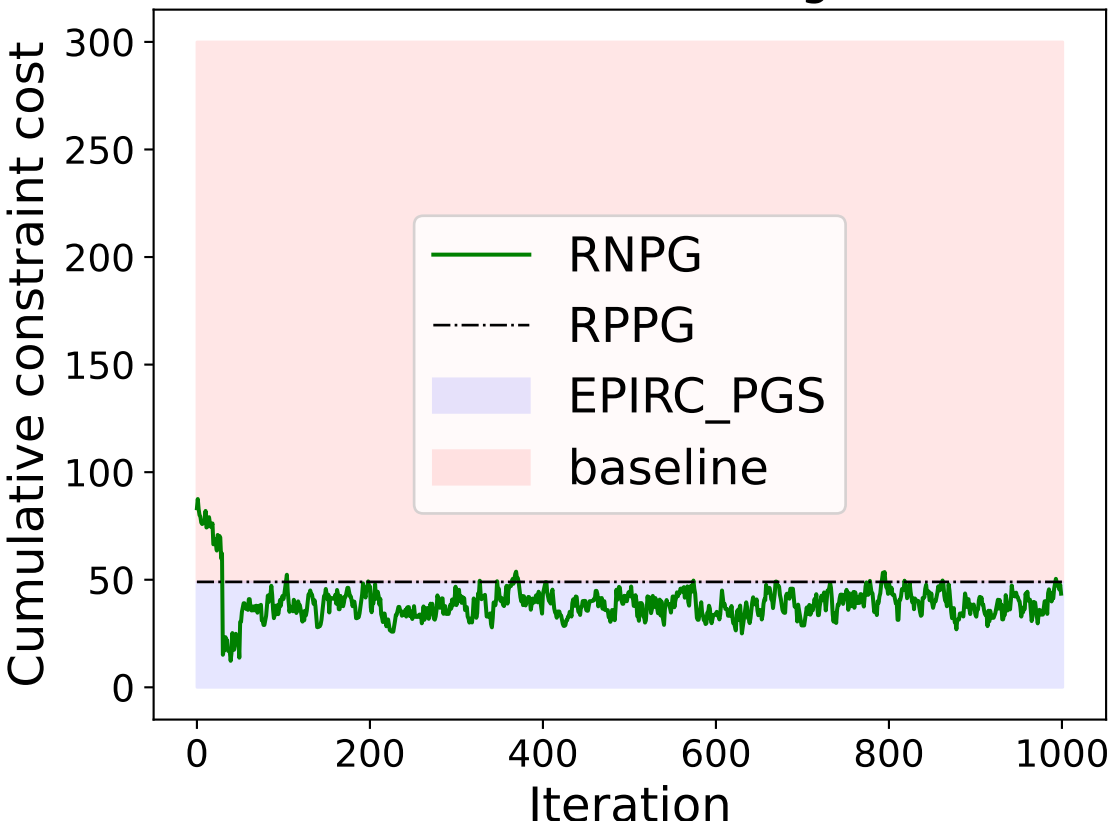

Supplement: supplementary_material [file CF_update_GC_initial_infeasible_policy.pdf › RNPG-main/After_rebuttal_questions/RNPG/CF_update_GC_initial_infeasible_policy.pdf]
