# Supplementary material
Source: ML conference proceedings conference paper supplement (https://openreview.net/forum?id=3MiADMHY62)

ward based setting where constraint to be above baseline(MR setting nS=4,n

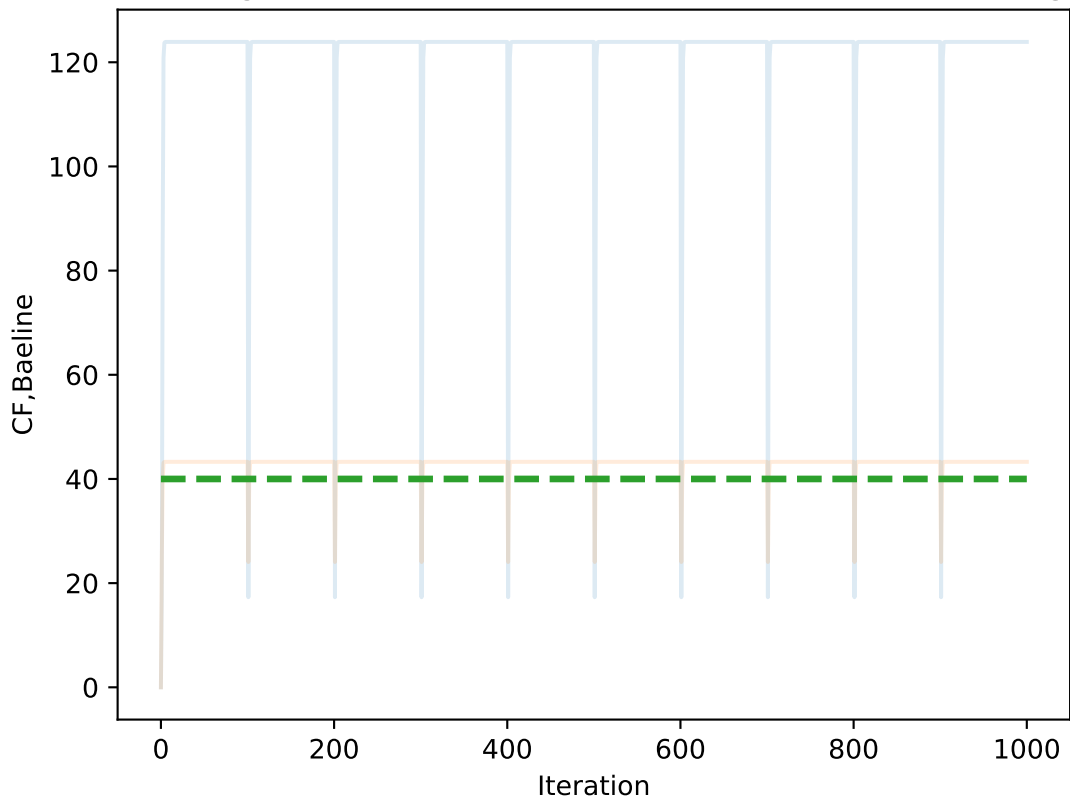

Supplement: supplementary_material [file EPI_RS_vf_cf_baseline_1000_steps_after_rej.pdf › RNPG-main/After_rebuttal_questions/RPPG/EPI_RS_vf_cf_baseline_1000_steps_after_rej.pdf]
