# Supplementary material
Source: ML conference proceedings conference paper supplement (https://openreview.net/forum?id=3MiADMHY62)

Maximum violation(MR setting nS=4,nA=2)

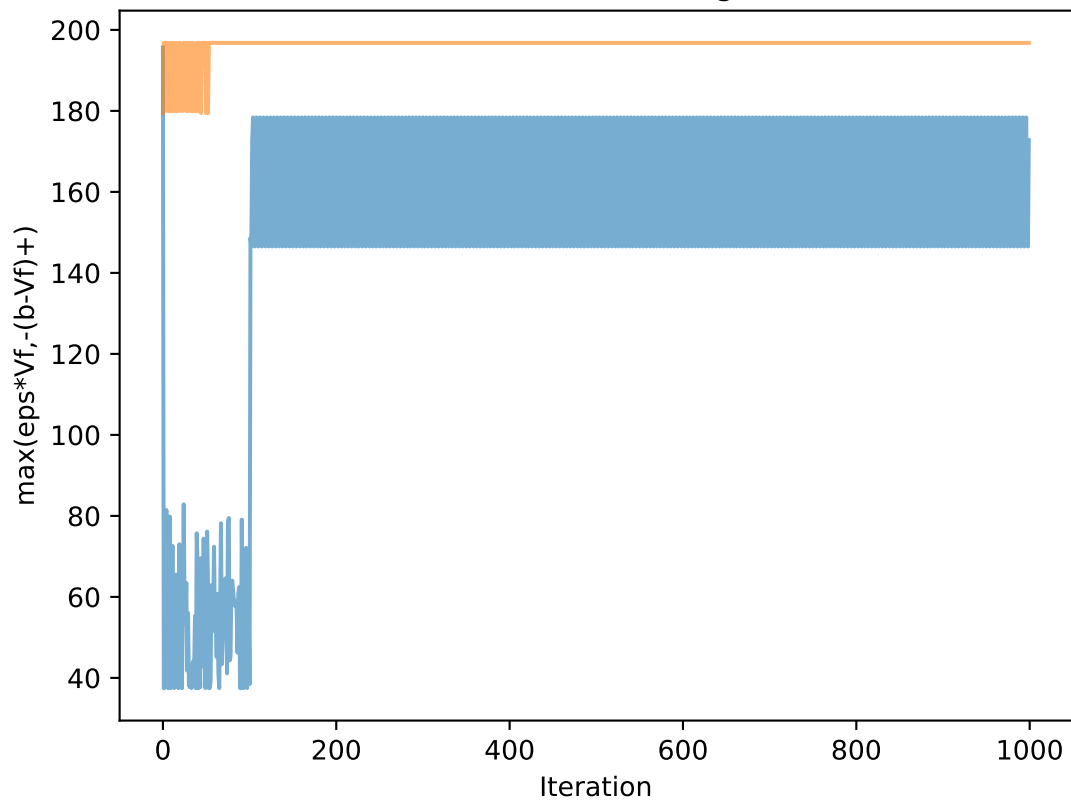

Supplement: supplementary_material [file Maximum_violation_1000_steps.pdf › RNPG-main/After_rebuttal_questions/RPPG/Maximum_violation_1000_steps.pdf]
