# Supplementary material
Source: ML conference proceedings conference paper supplement (https://openreview.net/forum?id=3MiADMHY62)

For lambda=10, RS(6,2)

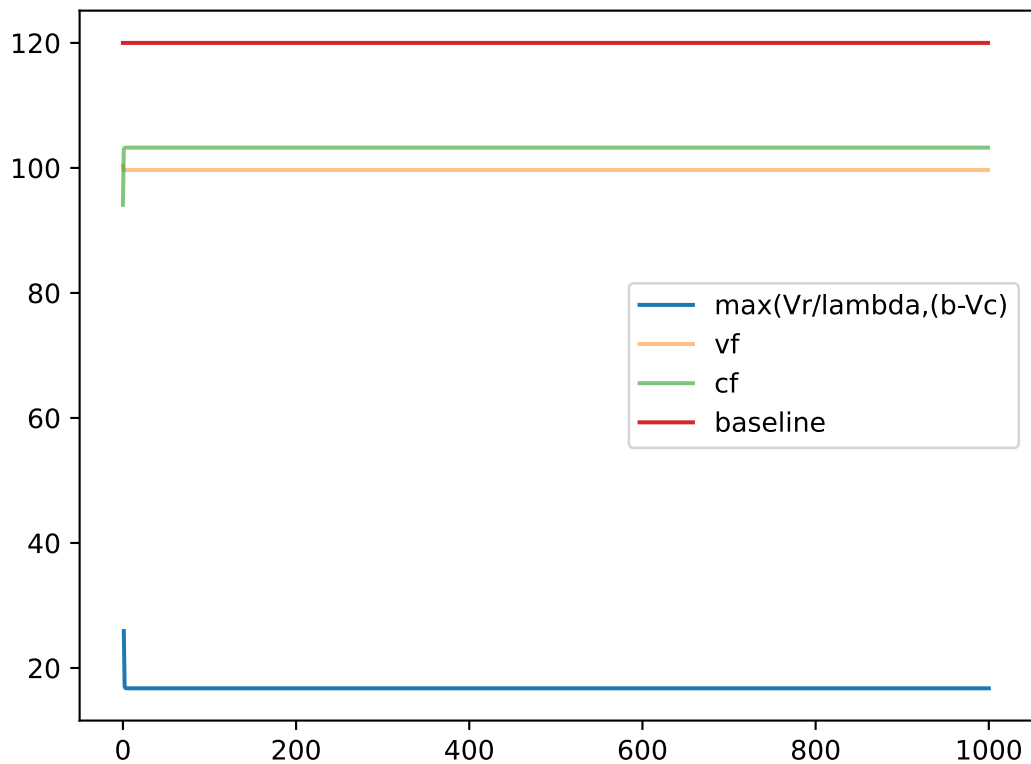

Supplement: supplementary_material [file Online_update_RPPG_RS(6,2).pdf › RNPG-main/After_rebuttal_questions/RPPG/Online_update_RPPG_RS(6,2).pdf]
