# Supplementary material
Source: ML conference proceedings conference paper supplement (https://openreview.net/forum?id=3MiADMHY62)

rd based setting where constraint to be above baseline(GARNET setting nS=6

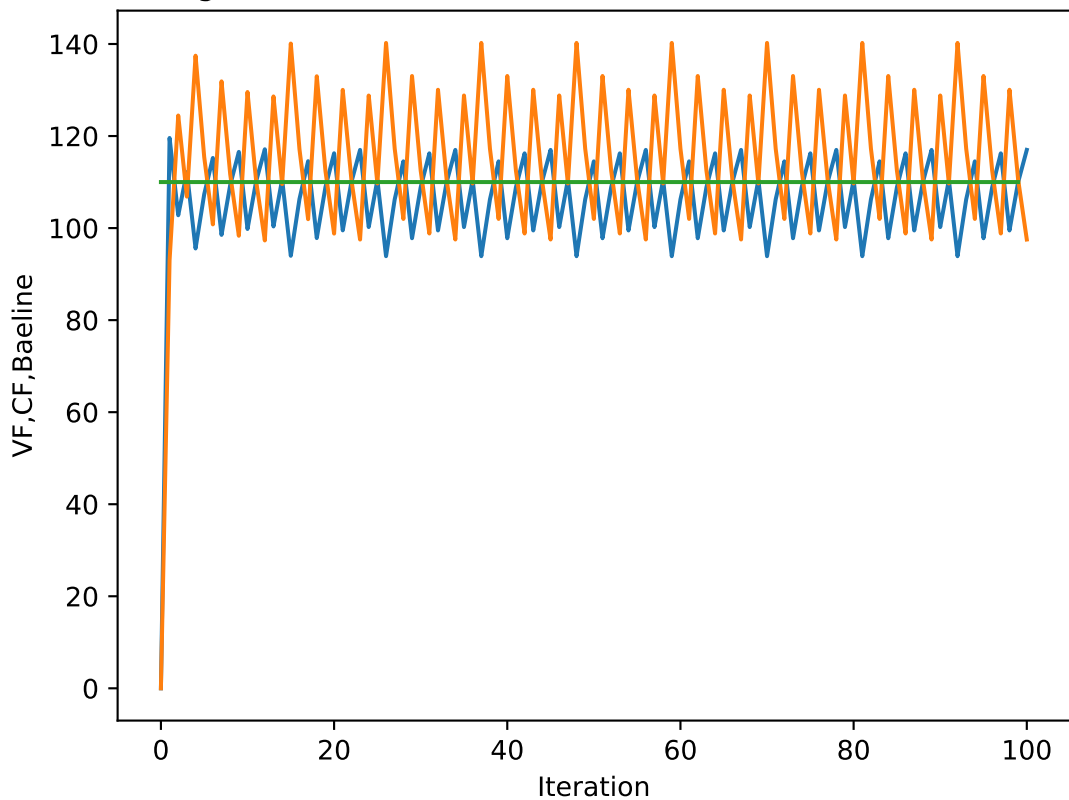

Supplement: supplementary_material [file Projected_RCMDP_garnet_smoothed_6_2.pdf › RNPG-main/After_rebuttal_questions/RPPG/Projected_RCMDP_garnet_smoothed_6_2.pdf]
