# Supplementary material
Source: ML conference proceedings conference paper supplement (https://openreview.net/forum?id=3MiADMHY62)

l based setting where constraint to be above baseline(GARNET setting nS=15

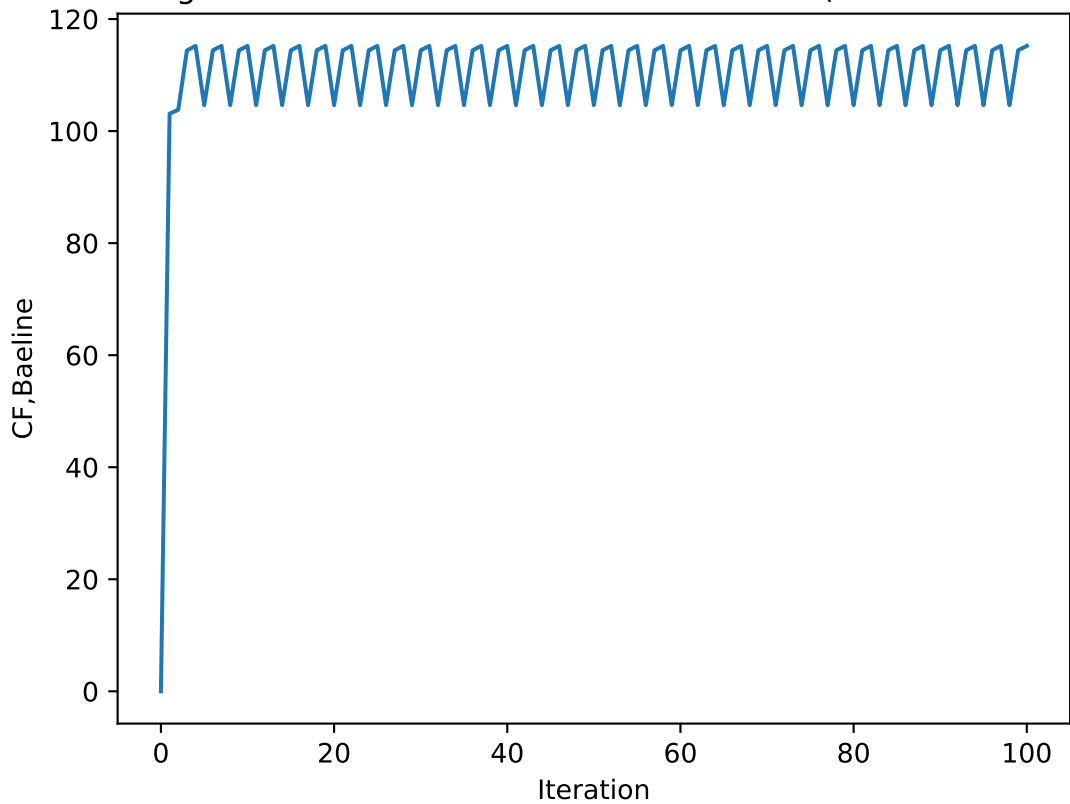

Supplement: supplementary_material [file Projected_RCMDP_garnet_smoothed_15_20_vf_100_steps.pdf › RNPG-main/After_rebuttal_questions/RPPG/Projected_RCMDP_garnet_smoothed_15_20_vf_100_steps.pdf]
