# Supplementary material
Source: ML conference proceedings conference paper supplement (https://openreview.net/forum?id=3MiADMHY62)

ward based setting where constraint to be above baseline(MR setting  $nS=4, n$

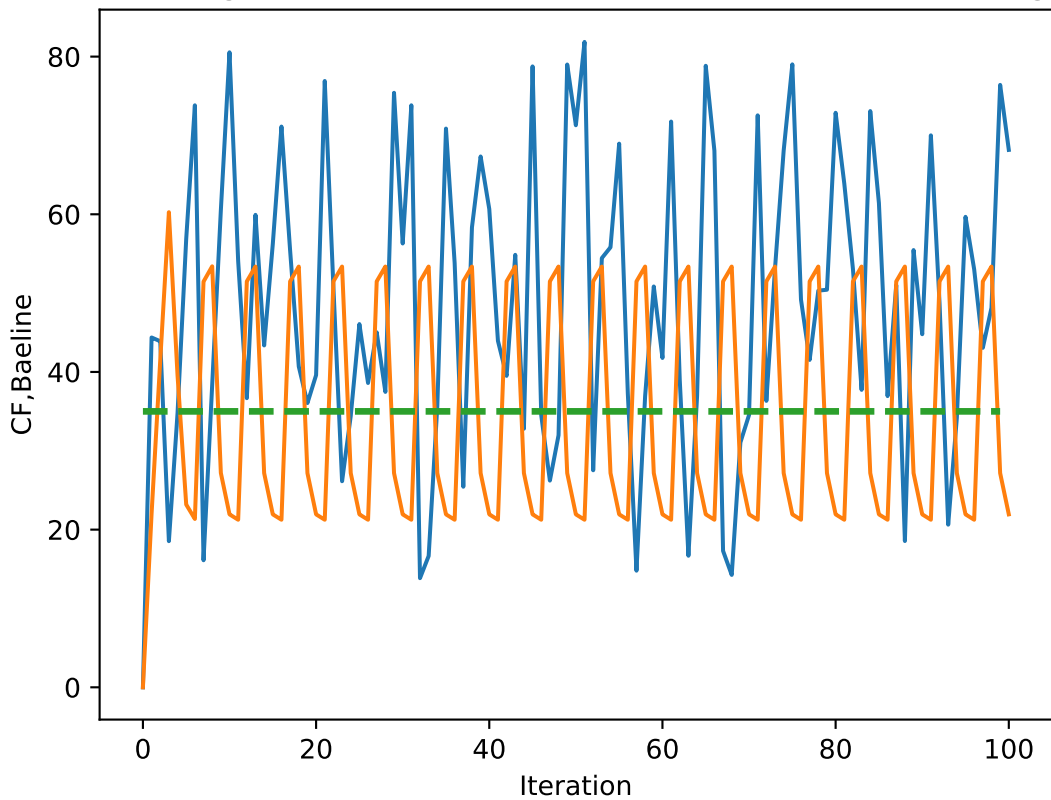

Supplement: supplementary_material [file RCMDP_MR_vf_cf_baseline_100_steps.pdf › RNPG-main/After_rebuttal_questions/RPPG/RCMDP_MR_vf_cf_baseline_100_steps.pdf]
