# Supplementary material
Source: ML conference proceedings conference paper supplement (https://openreview.net/forum?id=3MiADMHY62)

River-swim setting

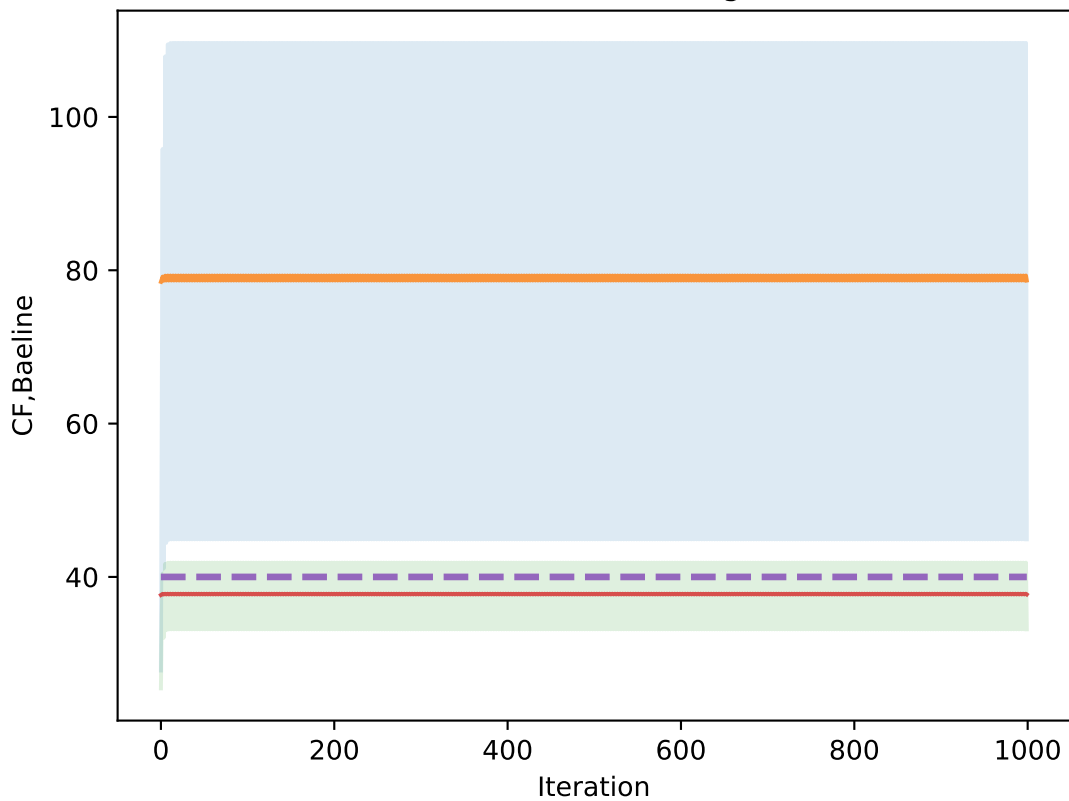

Supplement: supplementary_material [file RCMDP_RS_vf_cf_baseline_1000_steps.pdf › RNPG-main/After_rebuttal_questions/RPPG/RCMDP_RS_vf_cf_baseline_1000_steps.pdf]
