# Supplementary material
Source: ML conference proceedings conference paper supplement (https://openreview.net/forum?id=3MiADMHY62)

# Expected Cost vs. Safety Limit

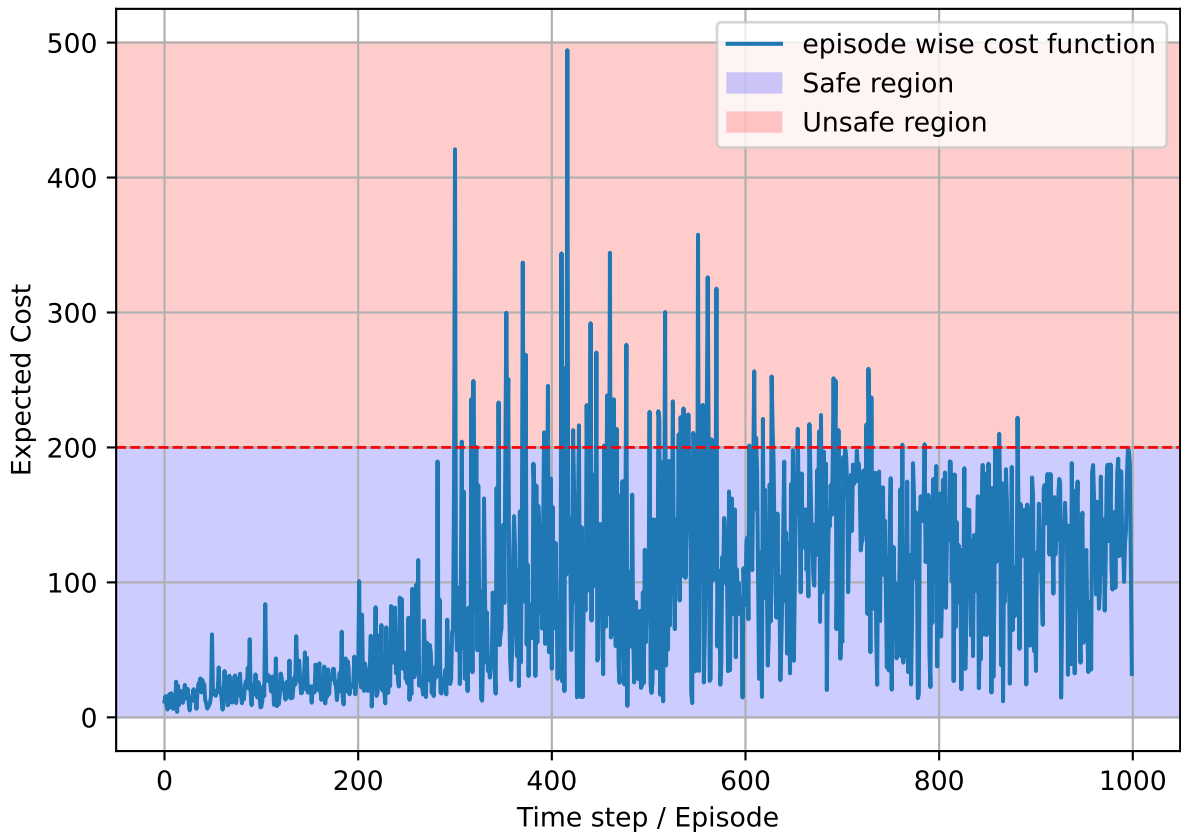

Supplement: supplementary_material [file RCMDP_setting_cartpole_cost_Crpo.pdf › RNPG-main/After_rebuttal_questions/CRPO_with_uncertainities/RCMDP_setting_cartpole_cost_Crpo.pdf]
