# Supplementary material
Source: ML conference proceedings conference paper supplement (https://openreview.net/forum?id=3MiADMHY62)

Episode wise Value function

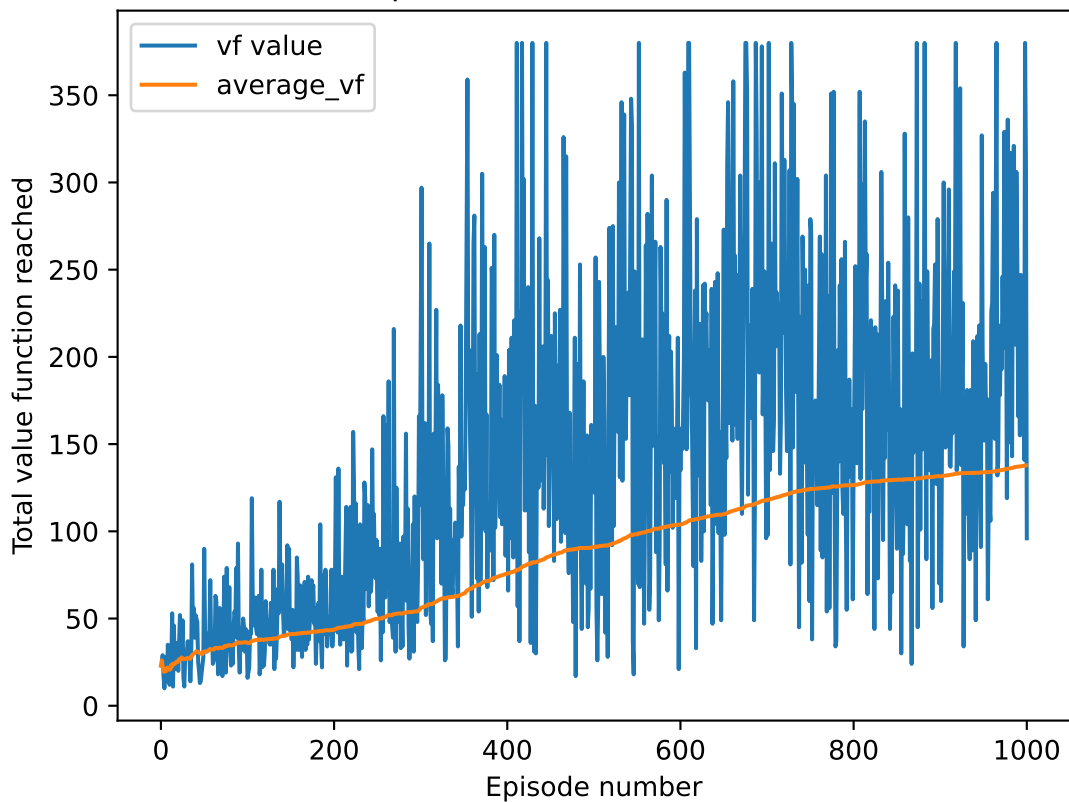

Supplement: supplementary_material [file RCMDP_setting_Cartpole_vf_Crpo.pdf › RNPG-main/After_rebuttal_questions/CRPO_with_uncertainities/RCMDP_setting_Cartpole_vf_Crpo.pdf]
