# Supplementary material
Source: ML conference proceedings conference paper supplement (https://openreview.net/forum?id=3MiADMHY62)

Garnet(15,20)

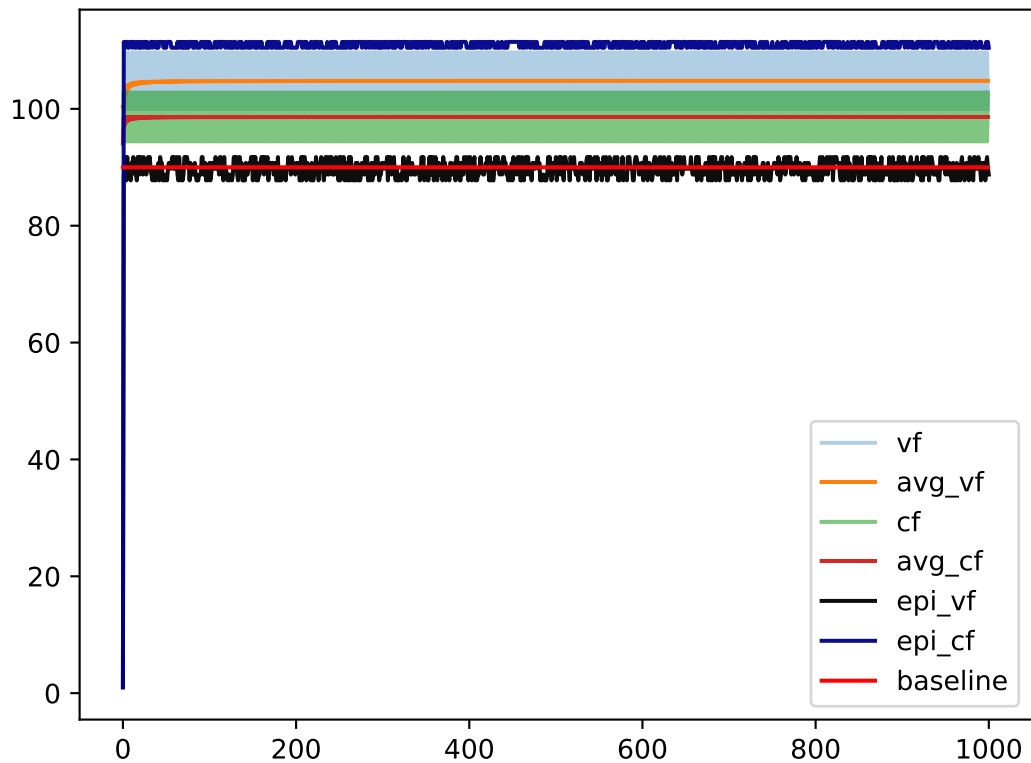

Supplement: supplementary_material [file RPPG_and_EPI_RC_Garnet(15,20)_correct_without_min.pdf › RNPG-main/After_rebuttal_questions/RPPG/RPPG_and_EPI_RC_Garnet(15,20)_correct_without_min.pdf]
