# Supplementary material
Source: ML conference proceedings conference paper supplement (https://openreview.net/forum?id=3MiADMHY62)

MR\_4s\_2a

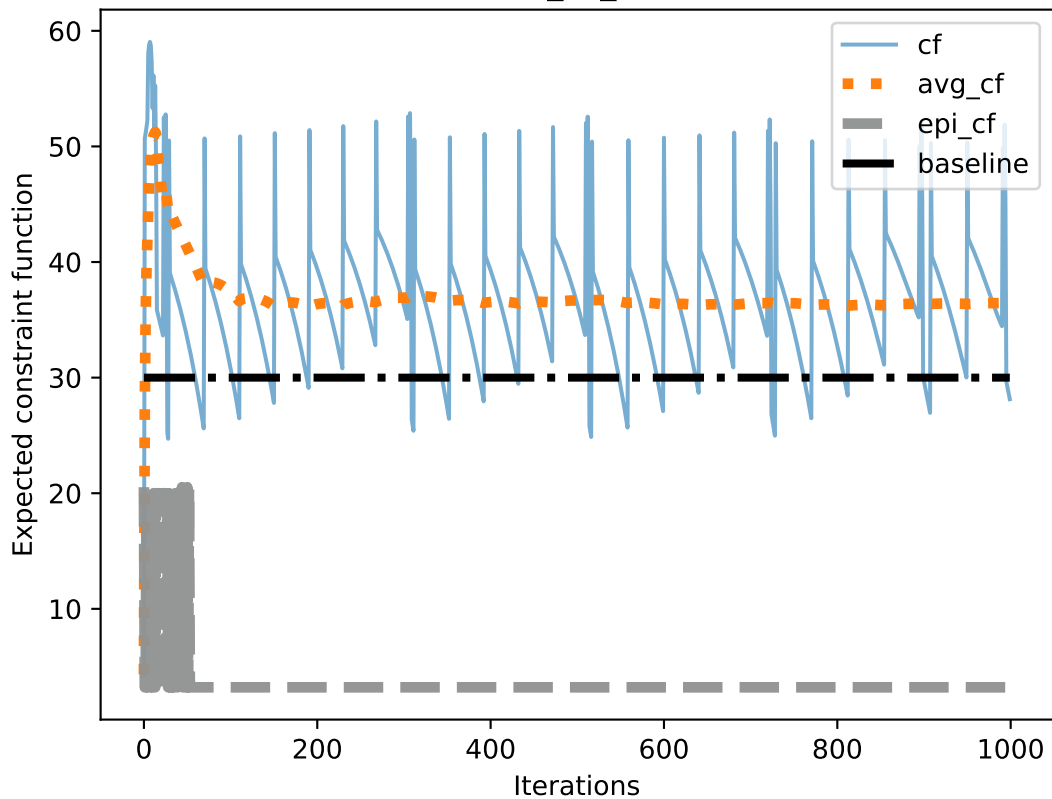

Supplement: supplementary_material [file RPPG_and_EPI_RC_MR_4s_2a_cf_12.pdf › RNPG-main/After_rebuttal_questions/RPPG/RPPG_and_EPI_RC_MR_4s_2a_cf_12.pdf]
