# Supplementary material
Source: ML conference proceedings conference paper supplement (https://openreview.net/forum?id=3MiADMHY62)
Supplement: supplementary_material [file tvf_and_tcf_data.xlsx]

## Sheet: Sheet1
	vf	cost
0	13	1.10848
1	11	0.364728
2	17	0.409225
3	20	0.634044
4	23	0.942071
5	17	0.840305
6	24	0.377278
7	12	0.379718
8	12	0.435842
9	38	2.63712
10	12	0.908648
11	15	0.912347
12	27	1.42829
13	17	0.570585
14	12	1.13736
15	16	0.866139
16	71	9.5855
17	40	1.32328
18	19	0.674259
19	18	1.01273
20	23	1.3523
21	27	0.808412
22	41	1.34572
23	28	1.05997
24	35	1.88816
25	16	1.36603
26	17	0.846501
27	13	0.875063
28	28	1.31994
29	8	0.201712
30	45	7.05304
31	11	0.667212
32	10	0.457778
33	15	0.804927
34	26	1.25014
35	9	0.277353
36	24	1.41518
37	14	1.19848
38	18	1.23143
39	20	1.72787
40	12	0.703601
41	12	0.854614
42	16	0.774031
43	17	0.583588
44	20	0.822585
45	11	0.766033
46	17	0.415449
47	27	0.850161
48	15	0.972905
49	14	0.786305
50	40	3.76656
51	11	0.376577
52	11	0.312801
53	35	1.33677
54	16	1.32754
55	13	0.804419
56	53	2.51631
57	23	1.22672
58	16	0.299178
59	20	0.510534
60	11	0.325022
61	25	1.51349
62	14	1.3789
63	11	0.363388
64	25	1.05818
65	47	1.84862
66	23	1.05334
67	12	0.745108
68	38	3.35704
69	12	0.97449
70	20	0.649913
71	32	0.609059
72	17	1.186
73	10	0.447084
74	20	0.494078
75	50	2.61004
76	14	0.475747
77	15	1.18991
78	14	0.387921
79	19	0.560887
80	10	0.447065
81	13	0.442271
82	37	3.95506
83	38	2.7047
84	28	0.96427
85	11	0.302759
86	16	0.816305
87	21	0.80189
88	12	0.492719
89	11	0.462076
90	19	0.466254
91	19	0.860611
92	28	0.878716
93	11	0.343768
94	13	0.608768
95	19	1.20823
96	24	1.76197
97	16	0.989488
98	11	0.602562
99	36	2.57562
100	23	1.55402
101	11	0.814526
102	30	2.17078
103	12	0.481369
104	25	1.22753
105	13	0.607222
106	18	1.27152
107	16	1.16558
108	16	0.721246
109	16	0.663502
110	13	0.648504
111	20	1.01359
112	17	0.805038
113	24	1.35063
114	13	0.729076
115	15	0.968966
116	18	0.582605
117	14	0.517016
118	17	0.628536
119	69	5.00618
120	34	0.553748
121	21	1.09169
122	16	0.441453
123	28	2.24467
124	28	1.16554
125	10	0.868022
126	24	0.921974
127	11	0.842363
128	68	10.7927
129	12	0.439375
130	53	3.35062
131	32	0.626461
132	18	0.460961
133	15	0.637311
134	52	8.83372
135	23	0.995264
136	24	1.53751
137	21	1.1742
138	15	0.471433
139	14	0.712482
140	59	6.56298
141	74	23.2317
142	43	2.50139
143	11	0.358112
144	39	4.12932
145	17	0.845751
146	24	1.19189
147	45	2.75781
148	47	3.66411
149	13	0.88086
150	44	1.78903
151	59	4.61241
152	45	3.82738
153	73	5.26326
154	55	2.38807
155	31	0.383335
156	19	1.1211
157	20	2.0753
158	35	0.719912
159	21	0.841511
160	27	0.262001
161	40	1.93506
162	38	1.39877
163	100	23.18
164	105	43.1017
165	35	1.70626
166	87	7.03159
167	56	6.86418
168	22	0.879881
169	43	1.41924
170	32	1.12834
171	20	0.65751
172	12	0.761909
173	36	2.22148
174	57	4.55246
175	80	36.0328
176	53	3.44893
177	67	9.15895
178	85	19.853
179	85	12.1701
180	58	11.4639
181	44	1.6653
182	22	0.534493
183	80	3.94542
184	92	11.7468
185	60	12.5516
186	33	3.13914
187	126	51.736
188	27	0.80092
189	66	4.81564
190	18	0.329659
191	50	3.68499
192	92	21.8053
193	71	12.2917
194	47	1.70595
195	62	7.40635
196	96	30.6349
197	38	2.86103
198	44	4.7409
199	34	0.526188
200	37	1.30643
201	21	1.06855
202	94	43.0426
203	37	2.49452
204	20	1.83812
205	24	0.763593
206	31	1.83227
207	66	7.38166
208	73	11.5549
209	47	1.262
210	39	1.40797
211	34	0.488893
212	21	0.866355
213	55	5.81648
214	108	55.4684
215	36	1.10707
216	139	87.3439
217	25	2.0866
218	79	10.2385
219	75	16.191
220	37	2.43844
221	44	1.53468
222	98	8.64761
223	43	3.26101
224	60	8.6694
225	58	5.29498
226	27	0.589816
227	65	5.07227
228	152	42.6009
229	41	1.83367
230	77	14.5114
231	65	13.5721
232	132	30.3155
233	17	1.55745
234	21	1.47827
235	70	9.42499
236	101	16.8394
237	104	11.1727
238	22	1.43116
239	32	1.07379
240	162	105.073
241	103	19.1964
242	80	5.63071
243	160	116.896
244	59	5.40677
245	98	16.8208
246	26	0.393772
247	177	47.9974
248	57	7.90322
249	41	2.32482
250	56	3.68175
251	65	10.3918
252	77	12.2753
253	122	27.4659
254	150	85.8093
255	24	1.41719
256	72	5.55305
257	130	30.0466
258	24	1.56583
259	76	24.6014
260	24	0.524796
261	74	15.2932
262	68	8.4743
263	65	4.48599
264	118	104.751
265	318	140.568
266	174	145.891
267	97	44.6052
268	106	57.6978
269	250	201.23
270	162	82.534
271	172	159.942
272	147	46.2308
273	159	52.7053
274	221	194.068
275	61	3.5475
276	349	379.678
277	180	195.287
278	184	90.5233
279	210	100.261
280	173	180.003
281	296	278.768
282	17	1.34706
283	184	100.445
284	223	62.3084
285	261	79.7497
286	193	132.809
287	141	73.0432
288	246	133.304
289	42	1.13041
290	245	170.719
291	135	99.6363
292	52	3.18854
293	232	136.027
294	78	9.57292
295	306	286.304
296	114	89.5603
297	54	2.06629
298	52	5.73157
299	234	254.893
300	108	79.6783
301	148	68.0339
302	143	75.7556
303	251	184.168
304	36	1.72213
305	192	12.3409
306	434	199.425
307	133	101.994
308	351	190.547
309	153	136.73
310	146	106.211
311	317	217.854
312	260	291.318
313	182	91.6856
314	238	237.711
315	384	226.732
316	296	63.1173
317	157	21.2195
318	159	24.5231
319	156	109.133
320	175	126.515
321	239	120.423
322	166	80.6755
323	169	179.803
324	221	188.894
325	259	97.9996
326	228	115.025
327	170	69.9481
328	233	207.618
329	233	204.76
330	285	173.962
331	194	142.528
332	261	262.81
333	97	39.2546
334	178	149.012
335	277	204.748
336	232	221.047
337	255	216.736
338	331	284.775
339	69	8.13265
340	21	0.571982
341	92	6.22382
342	76	11.0157
343	257	218.198
344	275	94.2162
345	330	282.049
346	210	183.895
347	440	259.335
348	314	169.878
349	101	48.9542
350	283	258.203
351	252	237.908
352	184	30.3082
353	389	272.011
354	274	203.516
355	174	148.812
356	401	285.309
357	198	162.791
358	148	155.632
359	207	141.532
360	358	290.867
361	290	225.261
362	255	87.5764
363	187	198.338
364	213	242.937
365	275	290.329
366	322	209.063
367	233	215.533
368	221	201.31
369	263	215.973
370	308	274.677
371	152	26.703
372	185	244.515
373	499	431.183
374	173	148.602
375	216	198.222
376	240	326.821
377	500	144.137
378	470	419.154
379	352	280.879
380	398	262.57
381	332	380.033
382	341	257.587
383	163	120.018
384	281	293.34
385	329	96.0703
386	246	203.617
387	124	14.3453
388	500	566.589
389	429	137.305
390	112	72.1301
391	392	391.957
392	236	93.9676
393	245	162.066
394	384	229.663
395	318	80.8032
396	184	71.6139
397	310	371.826
398	348	114.489
399	272	174.11
400	261	210.481
401	463	187.739
402	356	93.7642
403	500	170.082
404	465	566.509
405	274	292.778
406	468	369.317
407	480	474.337
408	500	151.366
409	500	310.732
410	500	210.287
411	500	344.581
412	360	507.756
413	333	293.422
414	248	146.181
415	186	66.7907
416	271	140.843
417	412	136.134
418	161	46.9144
419	211	114.936
420	244	109.942
421	500	316.325
422	240	66.3333
423	74	16.4938
424	500	484.102
425	283	189.026
426	234	155.299
427	500	301.592
428	332	195.322
429	500	328.709
430	187	105.528
431	422	166.994
432	256	161.423
433	112	46.6685
434	214	266.242
435	378	274.712
436	189	179.741
437	421	296.521
438	402	270.854
439	263	89.7531
440	359	319.511
441	369	213.794
442	437	310.336
443	292	257.556
444	500	384.462
445	186	100.614
446	500	245.372
447	500	321.539
448	305	175.261
449	346	163.973
450	500	346.671
451	372	218.805
452	296	72.0551
453	236	39.8201
454	262	261.887
455	462	469.234
456	380	182.222
457	450	176.273
458	106	27.2769
459	500	157.708
460	357	219.257
461	341	106.794
462	413	334.512
463	200	162.222
464	223	188.351
465	500	203.621
466	496	458.145
467	163	38.418
468	484	205.58
469	500	226.519
470	500	245.991
471	219	154.289
472	500	276.496
473	328	371.479
474	490	182.116
475	500	155.634
476	244	127.808
477	465	247.086
478	500	187.644
479	247	241.137
480	176	92.884
481	500	207.044
482	407	142.447
483	353	304.227
484	348	242.95
485	500	292.741
486	292	196.468
487	434	264.717
488	330	181.722
489	500	176.773
490	132	68.1024
491	323	228.499
492	420	418.378
493	465	119.046
494	229	100.962
495	220	157.445
496	481	232.101
497	500	303.693
498	500	134.297
499	221	150.86
500	237	149.265
501	500	240.521
502	166	137.897
503	312	153.572
504	362	251.919
505	488	160.235
506	500	205.73
507	196	31.2815
508	500	272.261
509	202	116.722
510	350	200.11
511	500	299.821
512	236	132.169
513	289	96.0874
514	472	157.842
515	440	457.504
516	500	324.138
517	334	210.228
518	252	101.677
519	315	237.744
520	220	132.366
521	363	248.071
522	498	322.859
523	368	495.981
524	420	320.881
525	498	416.734
526	210	165.3
527	220	216.867
528	374	196.962
529	403	357.939
530	283	158.89
531	279	218.474
532	269	205.735
533	500	262.787
534	170	116.073
535	500	227.034
536	434	249.18
537	500	263.236
538	432	269.547
539	384	195.367
540	303	181.788
541	421	485.969
542	500	570.146
543	500	279.499
544	500	95.3136
545	447	671.671
546	490	257.364
547	248	90.8797
548	326	79.0155
549	500	107.619
550	180	115.99
551	180	79.1647
552	500	491.752
553	500	264.73
554	346	310.205
555	500	155.038
556	500	559.031
557	454	140.372
558	500	247.562
559	500	294.362
560	500	599.249
561	412	408.07
562	416	239.585
563	228	81.6902
564	500	525.762
565	138	114.305
566	480	290.486
567	500	344.268
568	397	329.48
569	257	297.007
570	202	187.994
571	355	353.719
572	495	358.056
573	298	297.835
574	370	298.871
575	431	570.623
576	244	103.709
577	452	360.574
578	500	634.105
579	500	250.327
580	122	101.354
581	500	68.4144
582	453	464.431
583	276	327.378
584	500	132.662
585	500	609.945
586	500	145.022
587	340	182.639
588	170	107.304
589	275	99.7626
590	500	136.714
591	316	227.908
592	500	332.501
593	500	330.32
594	500	154.436
595	366	207.082
596	500	455.821
597	500	159.208
598	500	480.386
599	500	143.898
600	500	208.212
601	264	308.791
602	500	296.941
603	500	252.641
604	500	118.565
605	500	219.279
606	500	573.022
607	500	77.9721
608	500	103.995
609	500	325.742
610	441	367.272
611	393	259.311
612	500	396.56
613	500	227.583
614	302	247.592
615	500	102.271
616	500	352.533
617	500	111.277
618	329	307.997
619	500	264.271
620	500	93.3103
621	500	438.149
622	487	309.453
623	500	349.027
624	500	125.766
625	500	367.74
626	500	396.441
627	403	367.436
628	305	275.049
629	500	150.8
630	500	213.272
631	500	115.975
632	455	434.037
633	500	367.54
634	30	1.20869
635	116	17.3374
636	500	218.3
637	184	157.962
638	303	276.582
639	365	209.186
640	273	105.31
641	403	203.007
642	171	164.809
643	183	114.597
644	500	229.098
645	259	315.99
646	500	198.396
647	109	43.9816
648	298	312.55
649	421	328.223
650	500	265.973
651	330	275.015
652	260	166.797
653	314	134.709
654	445	474.842
655	500	173.042
656	500	101.851
657	499	376.201
658	500	271.046
659	500	374.628
660	500	211.533
661	500	76.5141
662	500	173.204
663	500	228.228
664	500	398.152
665	500	242.067
666	500	243.712
667	500	370.384
668	500	137.012
669	500	130.365
670	500	223.147
671	500	487.361
672	500	104.982
673	500	143.266
674	500	246.941
675	500	98.4322
676	500	255.645
677	500	123.931
678	500	420.633
679	500	161.048
680	500	83.0704
681	500	84.8844
682	500	190.914
683	500	121.7
684	500	119.256
685	292	117.991
686	500	205.185
687	500	154.457
688	500	126.204
689	500	168.354
690	236	43.3156
691	500	279.512
692	500	140.453
693	500	198.337
694	500	318.42
695	500	126.216
696	500	93.4589
697	500	190.002
698	500	197.089
699	500	183.307
700	500	231.349
701	500	471.468
702	500	121.881
703	500	267.362
704	500	347.659
705	500	106.695
706	500	87.0201
707	500	310.931
708	500	208.479
709	500	110.643
710	500	412.934
711	500	351.38
712	500	205.543
713	500	356.429
714	500	283.793
715	500	371.345
716	500	336.228
717	500	292.737
718	500	330.882
719	500	219.346
720	500	325.728
721	500	225.946
722	500	209.173
723	500	340.465
724	412	369.658
725	264	147.815
726	500	215.191
727	500	306.268
728	500	257.413
729	500	463.491
730	500	415.998
731	500	238.052
732	500	91.5548
733	500	331.479
734	500	268.101
735	500	321.263
736	500	527.542
737	193	202.291
738	500	250.846
739	500	299.988
740	500	72.7401
741	500	421.255
742	500	678.686
743	500	494.839
744	500	155.414
745	450	290.863
746	396	466.164
747	500	243.567
748	500	212.838
749	500	417.527
750	500	462.163
751	482	533.903
752	500	304.307
753	500	256.586
754	500	119.012
755	500	380.352
756	500	262.098
757	500	238.212
758	500	190.443
759	437	275.569
760	500	337.305
761	500	321.811
762	500	585.477
763	500	94.2531
764	500	430.547
765	500	350.79
766	500	168.352
767	500	381.673
768	500	281.219
769	500	117.674
770	500	287.82
771	500	187.68
772	500	392.952
773	500	185.952
774	500	198.269
775	500	313.492
776	500	211.919
777	500	236.866
778	500	279.913
779	500	364.795
780	500	371.507
781	500	251.142
782	500	152.012
783	500	74.8681
784	500	236.07
785	500	173.178
786	500	124.017
787	500	347.873
788	500	211.236
789	500	219.286
790	500	320.993
791	500	348.123
792	500	213.725
793	500	276.846
794	500	108.905
795	500	224.942
796	500	280.082
797	500	519.374
798	500	367.833
799	500	186.915
800	500	242.567
801	500	364.807
802	413	337.96
803	500	183.942
804	500	412.231
805	500	342.512
806	500	164.288
807	500	259.349
808	500	295.477
809	500	309.904
810	500	177.213
811	500	178.833
812	500	158.765
813	500	371.465
814	500	162.867
815	500	62.0386
816	500	474.218
817	500	209.997
818	500	259.898
819	500	614.52
820	500	405.983
821	500	153.183
822	500	199.262
823	500	205.631
824	500	268
825	500	318.161
826	500	482.695
827	500	374.493
828	500	525.834
829	500	174.961
830	500	394.405
831	421	502.684
832	500	152.65
833	441	225.489
834	218	49.8191
835	500	420.925
836	500	700.415
837	500	350.426
838	500	339.46
839	500	334.417
840	500	356.877
841	500	270.821
842	500	395.163
843	500	537.606
844	479	669.008
845	500	392.199
846	425	500.791
847	500	449.873
848	500	522.413
849	500	200.134
850	500	290.371
851	347	311.18
852	430	531.328
853	288	198.591
854	500	344.126
855	500	414.13
856	500	332.744
857	500	378.236
858	353	384.634
859	370	331.848
860	394	448.521
861	500	82.1519
862	449	466.042
863	325	352.866
864	351	426.798
865	345	329.455
866	364	347.282
867	396	374.221
868	500	349.055
869	500	165.988
870	302	259.575
871	326	214.77
872	418	371.974
873	267	276.99
874	270	296.143
875	235	171.485
876	394	311.749
877	257	299.874
878	267	314.62
879	495	325.694
880	340	296.013
881	264	263.731
882	347	334.868
883	327	343.174
884	369	367.165
885	224	225.945
886	372	233.46
887	486	464.656
888	357	301.561
889	227	235.967
890	257	265.545
891	500	262.317
892	326	267.156
893	317	322.082
894	500	97.5671
895	287	259.719
896	367	364.872
897	449	337.369
898	393	329.487
899	307	234.33
900	275	252.747
901	245	244.618
902	334	298.072
903	445	331.427
904	331	296.018
905	290	286.255
906	331	251.164
907	426	268.789
908	337	264.844
909	296	223.33
910	370	281.336
911	434	317.163
912	307	249.028
913	276	215.598
914	319	275.518
915	278	251.692
916	282	261.755
917	336	241.251
918	362	259.189
919	357	281.236
920	316	254.335
921	431	290.919
922	484	334.939
923	340	228.993
924	325	264.888
925	275	248.6
926	500	148.39
927	394	251.428
928	357	255.399
929	500	249.461
930	406	280.971
931	324	356.476
932	500	133.119
933	477	291.573
934	361	329.407
935	277	262.87
936	368	234.688
937	500	492.379
938	395	311.621
939	384	272.459
940	500	333.68
941	392	317.61
942	336	290.554
943	500	79.6296
944	500	350.796
945	500	242.331
946	500	131.525
947	389	386.02
948	480	330.749
949	272	236.304
950	500	134.982
951	500	223.487
952	371	411.213
953	500	189.497
954	500	126.363
955	500	331.918
956	500	156.678
957	500	324.669
958	500	72.3414
959	500	436.307
960	500	398.855
961	500	113.349
962	500	99.1428
963	500	153.562
964	500	56.993
965	500	100.895
966	500	129.436
967	500	402.717
968	500	221.344
969	500	91.4147
970	500	595.858
971	500	140.805
972	500	305.51
973	500	582.867
974	500	290.857
975	419	493.494
976	500	321.806
977	413	388.937
978	500	318.805
979	500	537.482
980	263	163.069
981	500	539.547
982	408	376.332
983	341	245.047
984	237	206.768
985	500	351.843
986	346	271.882
987	201	163.778
988	214	163.999
989	226	188.926
990	322	219.293
991	387	250.735
992	206	110.356
993	295	183.223
994	253	170.184
995	277	229.24
996	274	242.853
997	289	204.18
998	249	213.693
999	229	152.42
