# Supplementary material
Source: ML conference proceedings conference paper supplement (https://openreview.net/forum?id=3MiADMHY62)
Supplement: supplementary_material [file tvf_and_tcf_data_with_uncertainity.xlsx]

## Sheet: Sheet1
	Unnamed: 0.1	Unnamed: 0	cost	reward	rewards
0	0	0	9.42226	16	16
1	1	1	10.7601	24	24
2	2	2	23.3257	40	40
3	3	3	7.90819	14	14
4	4	4	11.352	21	21
5	5	5	26.514	46	46
6	6	6	7.12787	18	18
7	7	7	7.28014	13	13
8	8	8	13.6777	30	30
9	9	9	18.8891	35	35
10	10	10	30.9912	64	64
11	11	11	24.237	50	50
12	12	12	9.62426	23	23
13	13	13	17.0778	33	33
14	14	14	13.3536	26	26
15	15	15	5.46446	13	13
16	16	16	8.99447	19	19
17	17	17	15.6017	30	30
18	18	18	36.9292	61	61
19	19	19	43.1127	77	77
20	20	20	17.6881	34	34
21	21	21	6.47464	13	13
22	22	22	8.34476	13	13
23	23	23	7.54728	18	18
24	24	24	7.00756	18	18
25	25	25	10.7994	24	24
26	26	26	11.9428	26	26
27	27	27	17.1184	33	33
28	28	28	29.5142	61	61
29	29	29	28.6519	60	60
30	30	30	11.3508	20	20
31	31	31	23.2705	39	39
32	32	32	25.864	55	55
33	33	33	12.2089	20	20
34	34	34	7.78837	17	17
35	35	35	38.6932	61	61
36	36	36	9.4947	20	20
37	37	37	42.4856	79	79
38	38	38	21.4838	36	36
39	39	39	15.5105	24	24
40	40	40	12.6705	32	32
41	41	41	9.27419	16	16
42	42	42	25.3973	48	48
43	43	43	18.6601	38	38
44	44	44	9.89354	18	18
45	45	45	32.5116	57	57
46	46	46	40.8268	75	75
47	47	47	19.8014	48	48
48	48	48	15.0964	26	26
49	49	49	16.299	33	33
50	50	50	33.7388	61	61
51	51	51	12.1767	19	19
52	52	52	34.1671	59	59
53	53	53	6.86252	15	15
54	54	54	14.4594	37	37
55	55	55	7.22108	18	18
56	56	56	27.3456	48	48
57	57	57	17.8784	37	37
58	58	58	17.6106	35	35
59	59	59	8.61444	23	23
60	60	60	28.2834	58	58
61	61	61	14.9414	34	34
62	62	62	7.42529	18	18
63	63	63	6.63944	17	17
64	64	64	32.5983	54	54
65	65	65	24.2818	51	51
66	66	66	26.4535	61	61
67	67	67	31.4123	50	50
68	68	68	22.0834	40	40
69	69	69	25.4701	66	66
70	70	70	22.2289	45	45
71	71	71	29.6171	69	69
72	72	72	16.1656	35	35
73	73	73	36.9354	67	67
74	74	74	8.9656	14	14
75	75	75	24.076	46	46
76	76	76	9.94379	24	24
77	77	77	13.4488	23	23
78	78	78	9.64805	20	20
79	79	79	11.9406	21	21
80	80	80	28.4028	61	61
81	81	81	13.5671	27	27
82	82	82	15.4987	26	26
83	83	83	32.3729	57	57
84	84	84	15.2878	26	26
85	85	85	7.07336	18	18
86	86	86	31.255	70	70
87	87	87	30.6574	57	57
88	88	88	21.5992	39	39
89	89	89	35.306	60	60
90	90	90	20.1935	33	33
91	91	91	25.0721	42	42
92	92	92	16.3811	29	29
93	93	93	46.886	92	92
94	94	94	5.77612	11	11
95	95	95	30.0842	50	50
96	96	96	58.0157	122	122
97	97	97	12.7236	28	28
98	98	98	21.445	37	37
99	99	99	23.9358	46	46
100	100	100	16.9279	40	40
101	101	101	16.3578	26	26
102	102	102	18.5609	39	39
103	103	103	23.2243	41	41
104	104	104	67.2488	116	116
105	105	105	22.4283	48	48
106	106	106	28.8268	57	57
107	107	107	33.29	63	63
108	108	108	17.9102	35	35
109	109	109	12.7633	28	28
110	110	110	19.4934	33	33
111	111	111	51.5994	113	113
112	112	112	39.9037	77	77
113	113	113	41.5366	73	73
114	114	114	32.3587	69	69
115	115	115	12.5991	28	28
116	116	116	33.8904	86	86
117	117	117	23.3523	51	51
118	118	118	11.4685	23	23
119	119	119	15.3405	27	27
120	120	120	20.4665	45	45
121	121	121	70.1226	95	95
122	122	122	8.49014	18	18
123	123	123	18.1113	35	35
124	124	124	39.1595	80	80
125	125	125	14.2914	42	42
126	126	126	20.8092	41	41
127	127	127	46.3629	66	66
128	128	128	17.2156	41	41
129	129	129	72.7409	124	124
130	130	130	25.6053	54	54
131	131	131	17.0696	31	31
132	132	132	21.2384	42	42
133	133	133	13.8777	26	26
134	134	134	22.3469	45	45
135	135	135	35.1263	74	74
136	136	136	18.5738	34	34
137	137	137	19.4915	39	39
138	138	138	9.70407	17	17
139	139	139	13.0084	22	22
140	140	140	8.19879	16	16
141	141	141	26.0637	62	62
142	142	142	17.0549	38	38
143	143	143	23.4496	42	42
144	144	144	29.6958	59	59
145	145	145	22.7418	44	44
146	146	146	20.3993	42	42
147	147	147	21.8254	53	53
148	148	148	17.8964	40	40
149	149	149	15.0122	33	33
150	150	150	31.1962	66	66
151	151	151	35.9828	86	86
152	152	152	14.1304	28	28
153	153	153	21.9032	42	42
154	154	154	41.6946	74	74
155	155	155	23.2094	49	49
156	156	156	18.7585	37	37
157	157	157	24.6321	48	48
158	158	158	41.0558	76	76
159	159	159	25.6249	52	52
160	160	160	17.9189	35	35
161	161	161	10.1959	22	22
162	162	162	23.9781	49	49
163	163	163	36.5043	93	93
164	164	164	22.3152	56	56
165	165	165	19.5392	51	51
166	166	166	27.1441	53	53
167	167	167	24.867	40	40
168	168	168	20.1354	40	40
169	169	169	17.2928	38	38
170	170	170	10.7285	22	22
171	171	171	21.6436	45	45
172	172	172	27.9815	53	53
173	173	173	25.1707	50	50
174	174	174	26.0971	44	44
175	175	175	17.4613	43	43
176	176	176	21.3662	38	38
177	177	177	26.6151	52	52
178	178	178	31.7922	60	60
179	179	179	18.6807	37	37
180	180	180	30.7355	70	70
181	181	181	30.6749	56	56
182	182	182	27.4382	43	43
183	183	183	21.3037	39	39
184	184	184	26.3728	60	60
185	185	185	13.5518	25	25
186	186	186	22.6809	46	46
187	187	187	38.3355	69	69
188	188	188	11.8357	23	23
189	189	189	13.6826	28	28
190	190	190	37.2916	75	75
191	191	191	21.8219	42	42
192	192	192	50.01	86	86
193	193	193	18.5127	37	37
194	194	194	31.2582	66	66
195	195	195	30.7967	56	56
196	196	196	30.7283	67	67
197	197	197	31.1094	59	59
198	198	198	20.3316	45	45
199	199	199	23.5049	42	42
200	200	200	46.3937	80	80
201	201	201	23.1645	47	47
202	202	202	34.899	63	63
203	203	203	33.2864	55	55
204	204	204	45.1987	77	77
205	205	205	24.5923	48	48
206	206	206	22.6718	46	46
207	207	207	21.69	44	44
208	208	208	39.1715	72	72
209	209	209	16.8449	36	36
210	210	210	22.6408	38	38
211	211	211	12.8834	29	29
212	212	212	44.115	75	75
213	213	213	51.1544	124	124
214	214	214	19.725	43	43
215	215	215	26.4836	61	61
216	216	216	77.5966	172	172
217	217	217	27.6896	53	53
218	218	218	27.2614	67	67
219	219	219	48.3036	108	108
220	220	220	41.9323	100	100
221	221	221	27.3855	61	61
222	222	222	16.1074	38	38
223	223	223	39.4358	66	66
224	224	224	20.2401	42	42
225	225	225	28.9125	51	51
226	226	226	96.1182	152	152
227	227	227	20.4604	41	41
228	228	228	20.8962	43	43
229	229	229	54.2445	116	116
230	230	230	15.9307	34	34
231	231	231	17.2492	33	33
232	232	232	31.4174	56	56
233	233	233	27.0821	58	58
234	234	234	36.8256	89	89
235	235	235	14.8416	26	26
236	236	236	23.769	52	52
237	237	237	30.4479	60	60
238	238	238	43.4115	116	116
239	239	239	15.3491	35	35
240	240	240	16.4223	31	31
241	241	241	49.2569	99	99
242	242	242	27.0067	77	77
243	243	243	22.8409	55	55
244	244	244	66.8369	94	94
245	245	245	122.558	192	192
246	246	246	56.6368	177	177
247	247	247	54.411	83	83
248	248	248	26.9556	61	61
249	249	249	24.9948	44	44
250	250	250	28.8067	50	50
251	251	251	62.81	109	109
252	252	252	30.0717	84	84
253	253	253	14.8934	32	32
254	254	254	54.6057	107	107
255	255	255	45.9964	98	98
256	256	256	11.3497	24	24
257	257	257	44.5793	106	106
258	258	258	13.6735	33	33
259	259	259	17.2294	37	37
260	260	260	20.6028	41	41
261	261	261	18.864	41	41
262	262	262	44.9245	72	72
263	263	263	22.3362	47	47
264	264	264	24.2978	68	68
265	265	265	29.4209	84	84
266	266	266	17.4321	33	33
267	267	267	25.3336	46	46
268	268	268	68.2707	98	98
269	269	269	25.8906	52	52
270	270	270	17.6528	31	31
271	271	271	20.2825	42	42
272	272	272	52.0024	91	91
273	273	273	12.9183	33	33
274	274	274	19.9951	43	43
275	275	275	15.0853	28	28
276	276	276	45.0096	68	68
277	277	277	70.7766	87	87
278	278	278	23.2474	47	47
279	279	279	32.7083	80	80
280	280	280	37.9448	58	58
281	281	281	44.7461	71	71
282	282	282	122.086	188	188
283	283	283	19.9055	37	37
284	284	284	18.4144	33	33
285	285	285	25.2988	52	52
286	286	286	27.087	55	55
287	287	287	18.9061	37	37
288	288	288	67.5921	121	121
289	289	289	59.0319	127	127
290	290	290	18.4799	38	38
291	291	291	53.7118	79	79
292	292	292	30.676	66	66
293	293	293	26.7595	54	54
294	294	294	8.06848	16	16
295	295	295	28.5544	43	43
296	296	296	41.5998	82	82
297	297	297	26.1161	59	59
298	298	298	50.4026	116	116
299	299	299	90.1882	92	92
300	300	300	25.5074	46	46
301	301	301	131.854	134	134
302	302	302	70.4501	96	96
303	303	303	71.106	108	108
304	304	304	48.0023	75	75
305	305	305	22.4779	39	39
306	306	306	64.4525	112	112
307	307	307	21.5873	41	41
308	308	308	43.8779	96	96
309	309	309	29.8208	51	51
310	310	310	20.4944	45	45
311	311	311	120.726	192	192
312	312	312	74.1489	85	85
313	313	313	63.6559	134	134
314	314	314	13.6466	27	27
315	315	315	102.35	153	153
316	316	316	63.884	180	180
317	317	317	15.9265	32	32
318	318	318	29.3662	58	58
319	319	319	33.0305	81	81
320	320	320	13.3974	25	25
321	321	321	58.2809	80	80
322	322	322	154.492	191	191
323	323	323	21.9756	54	54
324	324	324	9.78713	24	24
325	325	325	43.2695	115	115
326	326	326	139.374	134	134
327	327	327	62.5652	89	89
328	328	328	70.9645	131	131
329	329	329	131.594	138	138
330	330	330	89.4887	142	142
331	331	331	102.161	173	173
332	332	332	41.9802	94	94
333	333	333	21.9896	43	43
334	334	334	26.5156	55	55
335	335	335	33.2985	80	80
336	336	336	51.5781	77	77
337	337	337	18.3233	37	37
338	338	338	27.4242	61	61
339	339	339	62.817	113	113
340	340	340	77.918	144	144
341	341	341	84.9716	136	136
342	342	342	24.0482	58	58
343	343	343	27.4984	56	56
344	344	344	27.8249	50	50
345	345	345	51.4163	102	102
346	346	346	38.4891	80	80
347	347	347	44.4254	109	109
348	348	348	61.1568	94	94
349	349	349	33.261	82	82
350	350	350	48.8415	114	114
351	351	351	27.081	67	67
352	352	352	17.3028	28	28
353	353	353	108.785	156	156
354	354	354	16.1576	37	37
355	355	355	90.956	177	177
356	356	356	148.319	152	152
357	357	357	30.3482	57	57
358	358	358	103.755	159	159
359	359	359	88.4138	142	142
360	360	360	119.169	120	120
361	361	361	143.123	138	138
362	362	362	116.609	168	168
363	363	363	17.3234	34	34
364	364	364	129.232	245	245
365	365	365	39.4883	77	77
366	366	366	100.421	121	121
367	367	367	82.6259	174	174
368	368	368	180.135	148	148
369	369	369	11.3876	25	25
370	370	370	16.7401	30	30
371	371	371	45.0615	105	105
372	372	372	145.886	170	170
373	373	373	103.794	205	205
374	374	374	142.54	159	159
375	375	375	37.2419	94	94
376	376	376	117.383	202	202
377	377	377	12.5668	32	32
378	378	378	188.581	191	191
379	379	379	39.3751	85	85
380	380	380	181.454	141	141
381	381	381	92.9032	246	246
382	382	382	181.059	143	143
383	383	383	105.544	169	169
384	384	384	24.6945	41	41
385	385	385	79.2217	115	115
386	386	386	98.0538	214	214
387	387	387	54.9901	74	74
388	388	388	22.5205	58	58
389	389	389	62.5456	152	152
390	390	390	178.29	159	159
391	391	391	146.668	160	160
392	392	392	22.1099	41	41
393	393	393	102.08	150	150
394	394	394	92.6057	192	192
395	395	395	157.042	131	131
396	396	396	39.8183	103	103
397	397	397	150.134	202	202
398	398	398	133.877	101	101
399	399	399	13.3183	26	26
400	400	400	57.2486	116	116
401	401	401	69.1429	122	122
402	402	402	117.445	176	176
403	403	403	29.6833	75	75
404	404	404	42.2874	67	67
405	405	405	39.7239	87	87
406	406	406	161.989	184	184
407	407	407	152.124	291	291
408	408	408	88.4284	110	110
409	409	409	84.7233	99	99
410	410	410	79.5082	195	195
411	411	411	74.1525	82	82
412	412	412	118.569	154	154
413	413	413	124.443	134	134
414	414	414	50.0502	127	127
415	415	415	16.8222	39	39
416	416	416	188.192	292	292
417	417	417	108.83	135	135
418	418	418	169.444	133	133
419	419	419	107.914	223	223
420	420	420	86.1836	133	133
421	421	421	75.3112	97	97
422	422	422	117.062	193	193
423	423	423	163.403	145	145
424	424	424	114.762	148	148
425	425	425	58.7832	171	171
426	426	426	99.3557	107	107
427	427	427	154.355	198	198
428	428	428	131.378	275	275
429	429	429	197.887	185	185
430	430	430	144.282	211	211
431	431	431	115.377	122	122
432	432	432	44.1239	71	71
433	433	433	123.153	117	117
434	434	434	120.018	263	263
435	435	435	101.624	156	156
436	436	436	16.482	37	37
437	437	437	120.696	209	209
438	438	438	88.3668	161	161
439	439	439	115.8	167	167
440	440	440	72.1411	94	94
441	441	441	123.836	148	148
442	442	442	149.317	173	173
443	443	443	147.329	214	214
444	444	444	143.159	251	251
445	445	445	104.386	210	210
446	446	446	130.435	209	209
447	447	447	101.843	228	228
448	448	448	134.554	155	155
449	449	449	9.44611	19	19
450	450	450	96.0672	191	191
451	451	451	108.084	254	254
452	452	452	123.263	141	141
453	453	453	106.969	173	173
454	454	454	230.687	248	248
455	455	455	196.971	237	237
456	456	456	158.756	184	184
457	457	457	172.362	205	205
458	458	458	132.233	160	160
459	459	459	42.532	125	125
460	460	460	80.5926	126	126
461	461	461	169.472	141	141
462	462	462	94.026	195	195
463	463	463	195.344	196	196
464	464	464	80.9198	178	178
465	465	465	88.6715	126	126
466	466	466	39.6012	123	123
467	467	467	57.7367	104	104
468	468	468	52.4999	99	99
469	469	469	159.916	148	148
470	470	470	67.7837	178	178
471	471	471	31.1322	73	73
472	472	472	77.669	170	170
473	473	473	146.879	269	269
474	474	474	180.012	159	159
475	475	475	145.301	143	143
476	476	476	130.786	202	202
477	477	477	145.083	193	193
478	478	478	70.8087	152	152
479	479	479	179.428	243	243
480	480	480	68.0355	165	165
481	481	481	46.1776	100	100
482	482	482	85.2705	142	142
483	483	483	94.1884	142	142
484	484	484	67.4004	108	108
485	485	485	59.9338	102	102
486	486	486	146.073	126	126
487	487	487	94.8106	146	146
488	488	488	103.198	228	228
489	489	489	39.7443	92	92
490	490	490	147.2	255	255
491	491	491	51.3191	102	102
492	492	492	77.9304	116	116
493	493	493	73.7557	112	112
494	494	494	149.642	230	230
495	495	495	143.263	196	196
496	496	496	150.822	222	222
497	497	497	18.0693	41	41
498	498	498	19.3978	36	36
499	499	499	90.5959	152	152
500	500	500	145.59	240	240
501	501	501	31.194	79	79
502	502	502	41.7899	124	124
503	503	503	29.2442	56	56
504	504	504	198.528	241	241
505	505	505	97.7133	151	151
506	506	506	85.9801	156	156
507	507	507	65.1691	167	167
508	508	508	130.232	114	114
509	509	509	72.9203	112	112
510	510	510	15.5411	29	29
511	511	511	173.135	188	188
512	512	512	191.608	147	147
513	513	513	94.8276	237	237
514	514	514	48.8759	120	120
515	515	515	191.866	245	245
516	516	516	117.461	168	168
517	517	517	138.38	384	384
518	518	518	101.486	125	125
519	519	519	182.873	207	207
520	520	520	100.17	193	193
521	521	521	136.498	231	231
522	522	522	152.799	187	187
523	523	523	104.547	150	150
524	524	524	60.4957	128	128
525	525	525	84.2941	140	140
526	526	526	108.252	170	170
527	527	527	184.724	254	254
528	528	528	124.56	166	166
529	529	529	150.239	231	231
530	530	530	77.7386	128	128
531	531	531	33.4419	58	58
532	532	532	156.063	187	187
533	533	533	132.261	247	247
534	534	534	129.006	217	217
535	535	535	144.21	201	201
536	536	536	120.984	165	165
537	537	537	99.121	184	184
538	538	538	168.565	220	220
539	539	539	125.194	195	195
540	540	540	123.317	146	146
541	541	541	78.5753	132	132
542	542	542	36.4716	80	80
543	543	543	142.4	170	170
544	544	544	56.5124	110	110
545	545	545	121.908	203	203
546	546	546	30.1499	64	64
547	547	547	86.8232	193	193
548	548	548	167.184	205	205
549	549	549	14.1724	29	29
550	550	550	109.305	265	265
551	551	551	62.0739	148	148
552	552	552	153.168	219	219
553	553	553	91.9522	149	149
554	554	554	176.977	187	187
555	555	555	60.2757	167	167
556	556	556	189.65	242	242
557	557	557	101.541	261	261
558	558	558	26.9067	58	58
559	559	559	195.649	229	229
560	560	560	125.275	242	242
561	561	561	127.259	173	173
562	562	562	168.124	236	236
563	563	563	136.548	116	116
564	564	564	94.2382	186	186
565	565	565	165.574	143	143
566	566	566	69.0351	124	124
567	567	567	153.434	173	173
568	568	568	161.109	184	184
569	569	569	120.77	164	164
570	570	570	127.753	276	276
571	571	571	7.18841	15	15
572	572	572	89.4877	154	154
573	573	573	123.192	173	173
574	574	574	52.3628	154	154
575	575	575	39.069	111	111
576	576	576	16.47	31	31
577	577	577	72.4204	108	108
578	578	578	46.5187	136	136
579	579	579	59.5749	162	162
580	580	580	31.7233	56	56
581	581	581	66.2631	122	122
582	582	582	124.691	174	174
583	583	583	45.5564	85	85
584	584	584	16.9728	35	35
585	585	585	50.186	77	77
586	586	586	144.69	177	177
587	587	587	14.2834	22	22
588	588	588	131.346	237	237
589	589	589	166.026	238	238
590	590	590	23.414	48	48
591	591	591	45.6566	99	99
592	592	592	29.9472	51	51
593	593	593	99.5437	102	102
594	594	594	149.424	124	124
595	595	595	200.282	274	274
596	596	596	57.5856	122	122
597	597	597	83.7259	130	130
598	598	598	167.279	173	173
599	599	599	310.175	259	259
600	600	600	165.01	234	234
601	601	601	134.974	255	255
602	602	602	22.4539	45	45
603	603	603	158.042	254	254
604	604	604	149.395	118	118
605	605	605	132.85	146	146
606	606	606	172.025	192	192
607	607	607	98.9858	161	161
608	608	608	108.128	181	181
609	609	609	121.476	184	184
610	610	610	164.32	159	159
611	611	611	121.302	104	104
612	612	612	38.0975	90	90
613	613	613	122.991	110	110
614	614	614	189.302	204	204
615	615	615	113.434	209	209
616	616	616	147.871	141	141
617	617	617	33.2443	100	100
618	618	618	166.721	202	202
619	619	619	49.0855	102	102
620	620	620	26.4402	52	52
621	621	621	118.603	208	208
622	622	622	92.8255	201	201
623	623	623	90.3874	169	169
624	624	624	75.973	125	125
625	625	625	73.621	129	129
626	626	626	150.228	300	300
627	627	627	79.6301	101	101
628	628	628	24.3495	51	51
629	629	629	222.207	309	309
630	630	630	94.7255	148	148
631	631	631	104.289	178	178
632	632	632	149.796	221	221
633	633	633	125.902	126	126
634	634	634	206.398	297	297
635	635	635	67.4569	110	110
636	636	636	175.047	243	243
637	637	637	151.525	240	240
638	638	638	108.409	163	163
639	639	639	89.4158	126	126
640	640	640	25.3329	53	53
641	641	641	117.937	172	172
642	642	642	104.494	183	183
643	643	643	75.3366	169	169
644	644	644	137.849	351	351
645	645	645	78.7863	110	110
646	646	646	269.497	271	271
647	647	647	102.733	282	282
648	648	648	124.371	201	201
649	649	649	278.917	400	400
650	650	650	81.1516	187	187
651	651	651	138.426	244	244
652	652	652	135.271	116	116
653	653	653	110.417	159	159
654	654	654	102.887	214	214
655	655	655	77.4316	110	110
656	656	656	130.109	191	191
657	657	657	171.626	154	154
658	658	658	159.593	193	193
659	659	659	105.298	209	209
660	660	660	145.138	148	148
661	661	661	224.35	236	236
662	662	662	159.589	120	120
663	663	663	117.28	165	165
664	664	664	140.261	172	172
665	665	665	137.498	259	259
666	666	666	200.537	245	245
667	667	667	203.115	229	229
668	668	668	168.412	195	195
669	669	669	13.5205	125	125
670	670	670	171.259	228	228
671	671	671	129.434	156	156
672	672	672	146.409	147	147
673	673	673	110.049	172	172
674	674	674	102.568	136	136
675	675	675	146.222	120	120
676	676	676	183.824	167	167
677	677	677	164.877	119	119
678	678	678	164.115	132	132
679	679	679	159.203	162	162
680	680	680	183.965	256	256
681	681	681	134.174	107	107
682	682	682	155.015	181	181
683	683	683	121.067	132	132
684	684	684	138.92	113	113
685	685	685	83.126	194	194
686	686	686	174.932	170	170
687	687	687	25.5918	123	123
688	688	688	191.764	198	198
689	689	689	151.503	127	127
690	690	690	130.848	243	243
691	691	691	100.501	150	150
692	692	692	28.1462	126	126
693	693	693	57.8182	109	109
694	694	694	150.738	390	390
695	695	695	75.6391	125	125
696	696	696	83.0549	118	118
697	697	697	112.427	157	157
698	698	698	133.655	222	222
699	699	699	159.327	223	223
700	700	700	36.5673	91	91
701	701	701	145.674	246	246
702	702	702	103.022	172	172
703	703	703	115.528	157	157
704	704	704	54.5098	149	149
705	705	705	127.165	177	177
706	706	706	46.3024	135	135
707	707	707	18.8705	117	117
708	708	708	60.0994	134	134
709	709	709	19.6882	117	117
710	710	710	184.698	234	234
711	711	711	52.2748	104	104
712	712	712	7.13333	116	116
713	713	713	153.785	213	213
714	714	714	16.708	129	129
715	715	715	104.687	210	210
716	716	716	199.727	179	179
717	717	717	73.953	204	204
718	718	718	60.5976	83	83
719	719	719	15.7882	110	110
720	720	720	11.2068	127	127
721	721	721	36.128	81	81
722	722	722	127.029	109	109
723	723	723	40.9332	79	79
724	724	724	94.2022	121	121
725	725	725	35.4415	68	68
726	726	726	42.0278	67	67
727	727	727	115.302	98	98
728	728	728	30.6271	65	65
729	729	729	10.5618	122	122
730	730	730	36.5506	98	98
731	731	731	186.256	134	134
732	732	732	120.411	151	151
733	733	733	103.59	162	162
734	734	734	49.9715	89	89
735	735	735	62.9107	87	87
736	736	736	149.09	133	133
737	737	737	199.501	201	201
738	738	738	100.528	193	193
739	739	739	186.143	285	285
740	740	740	92.3469	136	136
741	741	741	142.149	176	176
742	742	742	78.8435	173	173
743	743	743	185.81	271	271
744	744	744	147.458	217	217
745	745	745	122.519	234	234
746	746	746	315.882	249	249
747	747	747	70.8971	144	144
748	748	748	137.894	267	267
749	749	749	186.409	255	255
750	750	750	95.1354	210	210
751	751	751	84.4199	118	118
752	752	752	107.036	208	208
753	753	753	129.419	207	207
754	754	754	127.697	195	195
755	755	755	67.717	88	88
756	756	756	104.604	156	156
757	757	757	158.027	221	221
758	758	758	21.6186	120	120
759	759	759	57.0285	127	127
760	760	760	137.254	200	200
761	761	761	186.16	247	247
762	762	762	104.799	168	168
763	763	763	150.905	194	194
764	764	764	31.8564	56	56
765	765	765	128.124	250	250
766	766	766	123.524	251	251
767	767	767	34.3957	66	66
768	768	768	137.936	204	204
769	769	769	131.244	203	203
770	770	770	123.821	236	236
771	771	771	116.692	268	268
772	772	772	174.407	201	201
773	773	773	43.538	101	101
774	774	774	118.107	166	166
775	775	775	175.25	186	186
776	776	776	118.512	223	223
777	777	777	108.121	245	245
778	778	778	109.433	150	150
779	779	779	68.1271	167	167
780	780	780	74.9932	172	172
781	781	781	95.4049	143	143
782	782	782	66.4799	123	123
783	783	783	30.119	71	71
784	784	784	71.3278	150	150
785	785	785	147.258	187	187
786	786	786	80.5488	116	116
787	787	787	161.57	201	201
788	788	788	84.6536	198	198
789	789	789	157.001	255	255
790	790	790	122.408	233	233
791	791	791	244.405	262	262
792	792	792	122.646	192	192
793	793	793	182.599	277	277
794	794	794	132.272	167	167
795	795	795	92.1714	197	197
796	796	796	156.398	219	219
797	797	797	30.8061	84	84
798	798	798	95.3548	180	180
799	799	799	60.3852	183	183
800	800	800	31.6969	62	62
801	801	801	171.103	194	194
802	802	802	79.453	143	143
803	803	803	107.775	242	242
804	804	804	195.577	253	253
805	805	805	153.885	291	291
806	806	806	127.297	222	222
807	807	807	199.167	268	268
808	808	808	353.768	264	264
809	809	809	96.2993	135	135
810	810	810	112.473	232	232
811	811	811	113.011	203	203
812	812	812	147.57	133	133
813	813	813	165.976	291	291
814	814	814	67.6281	90	90
815	815	815	118.103	166	166
816	816	816	134.457	218	218
817	817	817	40.3291	79	79
818	818	818	161.476	280	280
819	819	819	199.969	253	253
820	820	820	180.829	226	226
821	821	821	159.004	181	181
822	822	822	143.606	210	210
823	823	823	115.184	116	116
824	824	824	123.97	223	223
825	825	825	122.351	208	208
826	826	826	22.6529	54	54
827	827	827	74.7255	132	132
828	828	828	43.0511	92	92
829	829	829	162.857	199	199
830	830	830	232.228	241	241
831	831	831	94.9832	164	164
832	832	832	152.112	192	192
833	833	833	147.555	275	275
834	834	834	42.0884	83	83
835	835	835	170.452	233	233
836	836	836	78.5426	188	188
837	837	837	82.7536	163	163
838	838	838	101.646	294	294
839	839	839	184.198	275	275
840	840	840	143.503	189	189
841	841	841	154.448	209	209
842	842	842	155.445	205	205
843	843	843	113.726	167	167
844	844	844	175.301	136	136
845	845	845	133.069	211	211
846	846	846	145.845	197	197
847	847	847	180.097	261	261
848	848	848	131.947	188	188
849	849	849	150.856	200	200
850	850	850	186.211	153	153
851	851	851	150.571	180	180
852	852	852	179.595	195	195
853	853	853	55.7175	176	176
854	854	854	195.832	153	153
855	855	855	133.457	212	212
856	856	856	124.237	273	273
857	857	857	176.066	247	247
858	858	858	162.174	250	250
859	859	859	198.657	305	305
860	860	860	214.869	268	268
861	861	861	143.172	226	226
862	862	862	124.055	236	236
863	863	863	160.285	242	242
864	864	864	43.1672	92	92
865	865	865	68.0908	89	89
866	866	866	87.7203	131	131
867	867	867	208.972	208	208
868	868	868	148.473	210	210
869	869	869	33.2736	79	79
870	870	870	138.135	206	206
871	871	871	247.79	285	285
872	872	872	116.113	177	177
873	873	873	126.363	253	253
874	874	874	41.4464	120	120
875	875	875	182.23	261	261
876	876	876	25.2506	125	125
877	877	877	209.739	295	295
878	878	878	91.1831	165	165
879	879	879	125.832	161	161
880	880	880	91.9014	141	141
881	881	881	118.524	190	190
882	882	882	135.87	165	165
883	883	883	198.044	230	230
884	884	884	126.441	173	173
885	885	885	89.6834	175	175
886	886	886	54.1115	133	133
887	887	887	110.662	257	257
888	888	888	88.5926	166	166
889	889	889	129.701	197	197
890	890	890	146.659	297	297
891	891	891	181.986	201	201
892	892	892	114.056	294	294
893	893	893	116.112	159	159
894	894	894	128.209	177	177
895	895	895	97.5202	125	125
896	896	896	146.364	277	277
897	897	897	241.93	241	241
898	898	898	125.824	193	193
899	899	899	152.241	227	227
900	900	900	266.874	224	224
901	901	901	216.297	239	239
902	902	902	166.864	250	250
903	903	903	146.871	210	210
904	904	904	41.4546	131	131
905	905	905	164.241	300	300
906	906	906	239.676	211	211
907	907	907	100.962	167	167
908	908	908	172.583	248	248
909	909	909	112.407	202	202
910	910	910	80.6873	191	191
911	911	911	139.189	182	182
912	912	912	115.263	194	194
913	913	913	52.7003	101	101
914	914	914	107.686	162	162
915	915	915	78.0094	88	88
916	916	916	138.762	191	191
917	917	917	246.729	153	153
918	918	918	154.407	183	183
919	919	919	158.567	153	153
920	920	920	135.391	205	205
921	921	921	148.011	202	202
922	922	922	52.7155	134	134
923	923	923	120.735	271	271
924	924	924	139.834	172	172
925	925	925	159.351	228	228
926	926	926	102.161	194	194
927	927	927	131.999	231	231
928	928	928	108.784	228	228
929	929	929	86.537	170	170
930	930	930	205.936	202	202
931	931	931	103.72	103	103
932	932	932	144.496	182	182
933	933	933	179.922	193	193
934	934	934	328.427	262	262
935	935	935	101.643	187	187
936	936	936	269.942	156	156
937	937	937	170.191	181	181
938	938	938	146.274	126	126
939	939	939	130.499	192	192
940	940	940	158.499	177	177
941	941	941	283.726	179	179
942	942	942	257.373	216	216
943	943	943	63.8827	127	127
944	944	944	136.16	255	255
945	945	945	137.296	167	167
946	946	946	171.142	237	237
947	947	947	66.958	108	108
948	948	948	198.883	185	185
949	949	949	194.188	220	220
950	950	950	189.932	187	187
951	951	951	104.626	247	247
952	952	952	146.652	183	183
953	953	953	156.456	212	212
954	954	954	26.9376	61	61
955	955	955	70.6492	138	138
956	956	956	101.408	186	186
957	957	957	120.265	151	151
958	958	958	113.324	164	164
959	959	959	73.747	118	118
960	960	960	144.525	241	241
961	961	961	88.3815	228	228
962	962	962	98.4966	153	153
963	963	963	65.674	129	129
964	964	964	153.373	198	198
965	965	965	159.454	153	153
966	966	966	136.57	186	186
967	967	967	156.83	182	182
968	968	968	64.9512	156	156
969	969	969	81.7009	134	134
970	970	970	92.7241	112	112
971	971	971	76.1784	99	99
972	972	972	191.744	224	224
973	973	973	78.484	206	206
974	974	974	129.146	165	165
975	975	975	161.865	230	230
976	976	976	57.7657	84	84
977	977	977	82.4823	149	149
978	978	978	123.606	180	180
979	979	979	133.417	255	255
980	980	980	130.005	178	178
981	981	981	164.188	168	168
982	982	982	129.976	106	106
983	983	983	187.457	179	179
984	984	984	70.3822	112	112
985	985	985	179.494	298	298
986	986	986	127.962	230	230
987	987	987	100.599	116	116
988	988	988	111.558	160	160
989	989	989	90.7481	118	118
990	990	990	113.826	211	211
991	991	991	184.021	198	198
992	992	992	91.0069	131	131
993	993	993	118.515	216	216
994	994	994	99.0433	172	172
995	995	995	92.2364	127	127
996	996	996	156.351	249	249
997	997	997	78.9449	117	117
998	998	998	53.2176	125	125
999	999	999	141.728	239	239
