# Supplementary material
Source: ML conference proceedings conference paper supplement (https://openreview.net/forum?id=3MiADMHY62)
Supplement: supplementary_material [file tvf_and_tcf_data_with_uncertainity_best_way.xlsx]

## Sheet: Sheet1
	cost	reward
0	11.1203	20
1	6.72894	16
2	14.6186	27
3	4.81431	12
4	7.74711	17
5	8.32038	17
6	9.99773	14
7	19.5424	29
8	6.76541	16
9	9.16949	17
10	7.05252	12
11	13.783	26
12	7.86967	20
13	11.4733	23
14	14.8102	27
15	6.58355	13
16	15.7957	41
17	5.61483	11
18	21.0156	38
19	7.24473	16
20	9.44684	15
21	9.87194	16
22	5.97021	10
23	9.87031	19
24	6.92226	15
25	13.5885	27
26	5.55911	15
27	18.756	32
28	7.4011	18
29	16.9529	37
30	7.24143	16
31	7.22535	21
32	13.8363	29
33	8.39897	20
34	10.918	18
35	14.3377	26
36	8.85883	20
37	31.556	57
38	9.74414	17
39	10.8135	22
40	29.2788	78
41	9.98125	17
42	6.43794	14
43	10.9186	19
44	20.2958	34
45	14.819	24
46	13.8412	22
47	11.3467	26
48	11.8002	18
49	20.0777	38
50	9.04503	16
51	26.9693	46
52	7.883	14
53	10.2565	21
54	6.11172	10
55	16.0564	40
56	15.7417	27
57	5.50259	19
58	11.6806	19
59	9.65092	19
60	27.5272	55
61	23.9413	55
62	6.64408	19
63	17.5654	33
64	6.45152	19
65	10.0193	17
66	9.96744	20
67	16.895	29
68	19.2959	44
69	8.99785	21
70	21.4794	42
71	9.71468	20
72	29.6174	49
73	9.12965	15
74	5.19648	12
75	17.9799	36
76	12.3597	26
77	3.56952	11
78	14.1189	31
79	6.10685	11
80	5.96519	10
81	5.57709	15
82	26.2967	64
83	24.5855	62
84	54.5708	99
85	21.9794	36
86	20.0766	35
87	7.09258	18
88	22.7682	44
89	21.4254	47
90	11.4435	21
91	8.19474	16
92	16.3249	30
93	25.9006	71
94	13.3814	28
95	87.5368	140
96	27.5995	45
97	14.1887	38
98	13.5357	31
99	10.2982	22
100	22.9982	41
101	16.9121	39
102	13.0428	20
103	20.2417	41
104	10.97	21
105	25.5832	50
106	10.5838	20
107	9.81786	25
108	14.5364	29
109	23.554	40
110	11.0441	23
111	27.3149	48
112	21.1162	36
113	11.068	17
114	9.95806	20
115	13.2027	24
116	11.7825	19
117	13.8538	24
118	22.8542	41
119	64.7505	88
120	44.7427	82
121	41.5409	104
122	39.3335	79
123	10.1643	24
124	12.0184	25
125	15.6845	28
126	50.7967	92
127	32.9289	59
128	28.6416	61
129	23.3686	42
130	11.4109	21
131	11.5914	18
132	72.505	90
133	13.4041	28
134	13.3794	24
135	19.9518	44
136	13.6228	30
137	18.3691	47
138	29.9229	58
139	17.3955	30
140	33.9927	73
141	25.7979	46
142	28.3661	55
143	58.7677	87
144	40.9684	105
145	8.81714	16
146	17.6552	40
147	28.5817	54
148	25.5793	45
149	55.3445	91
150	19.9304	44
151	15.4664	27
152	12.8105	28
153	6.582	14
154	12.3366	27
155	10.7159	27
156	16.7517	37
157	24.1245	48
158	26.1963	52
159	35.4176	72
160	8.31704	19
161	30.1353	73
162	21.4064	46
163	9.58145	15
164	32.5332	93
165	18.2527	45
166	35.0603	87
167	23.7498	57
168	28.3966	65
169	5.51362	22
170	24.4548	48
171	18.6859	34
172	29.4185	64
173	11.4789	25
174	55.7259	121
175	98.2354	151
176	42.9867	80
177	22.9976	50
178	38.0968	86
179	38.4587	65
180	11.5746	29
181	15.0468	30
182	44.1362	92
183	37.5132	61
184	65.0383	95
185	18.8636	37
186	24.634	48
187	40.1472	81
188	17.5715	32
189	65.14	91
190	21.196	38
191	27.6262	79
192	34.6079	60
193	23.9207	69
194	31.309	71
195	29.9851	73
196	68.3017	97
197	8.49743	16
198	34.0765	57
199	25.2839	55
200	38.5097	92
201	14.4805	30
202	36.5024	77
203	59.1944	182
204	38.7332	101
205	37.0954	67
206	33.6247	55
207	32.4804	70
208	46.6952	87
209	19.8804	43
210	32.8636	76
211	96.0619	100
212	25.5205	56
213	36.8019	59
214	21.7291	39
215	21.547	39
216	25.0026	60
217	159.134	139
218	18.0288	39
219	98.1572	115
220	134.547	136
221	102.642	177
222	114.046	175
223	18.9525	36
224	69.9172	111
225	25.5534	57
226	81.2184	102
227	14.0206	29
228	27.9921	60
229	110.691	176
230	50.18	120
231	80.7194	105
232	14.6564	28
233	64.5031	153
234	38.9458	75
235	17.9802	42
236	105.273	177
237	31.5171	58
238	59.5196	93
239	53.8652	81
240	163.483	172
241	109.249	112
242	14.2701	31
243	17.176	34
244	65.2438	100
245	49.1021	68
246	85.7422	140
247	28.669	62
248	23.2466	50
249	12.2425	28
250	70.537	96
251	113.053	115
252	163.696	300
253	75.5098	132
254	26.9652	61
255	34.2288	77
256	170.059	162
257	39.351	99
258	21.7302	36
259	70.6865	159
260	107.75	117
261	241.148	172
262	33.4817	78
263	238.942	234
264	25.7014	46
265	140.722	120
266	60.3866	99
267	59.0216	184
268	11.9329	21
269	39.5771	85
270	84.5146	142
271	89.9537	158
272	109.287	122
273	176.986	173
274	26.4567	48
275	16.4141	38
276	82.2526	137
277	41.518	78
278	192.891	290
279	76.9012	137
280	17.8076	44
281	92.1565	256
282	282.023	186
283	177.301	305
284	99.6837	103
285	91.1395	180
286	245.314	290
287	17.6005	29
288	23.1197	43
289	60.21	121
290	109.162	176
291	224.038	195
292	203.351	161
293	35.6416	68
294	86.2176	161
295	12.911	31
296	32.3845	77
297	33.9635	83
298	75.5036	123
299	74.8247	131
300	63.5998	126
301	23.2483	38
302	27.2611	52
303	91.8964	178
304	23.4224	45
305	40.7102	66
306	76.5411	169
307	138.145	177
308	87.7649	159
309	29.5916	62
310	84.3986	181
311	89.9805	120
312	158.898	132
313	12.9666	24
314	55.3283	116
315	414.097	320
316	69.0848	126
317	175.558	123
318	29.1834	70
319	107.638	179
320	122.165	182
321	93.8734	103
322	97.3161	151
323	62.9229	160
324	45.9385	97
325	35.4855	73
326	102.352	173
327	79.4586	120
328	73.0915	113
329	32.0031	73
330	161.262	245
331	214.093	257
332	11.0487	29
333	71.8054	93
334	46.6425	117
335	112.748	148
336	175.156	120
337	202.222	207
338	20.2299	50
339	74.2097	91
340	25.5331	60
341	12.8838	23
342	129.669	116
343	99.1072	129
344	70.4477	107
345	109.205	190
346	177.701	130
347	131.411	109
348	78.6974	131
349	132.37	180
350	26.3024	45
351	85.1889	99
352	82.9073	135
353	82.9897	125
354	34.6028	80
355	24.2773	43
356	66.963	127
357	90.2534	132
358	24.2722	41
359	49.7296	67
360	208.554	238
361	31.4232	52
362	130.593	200
363	235.108	169
364	52.8411	69
365	78.9843	172
366	29.3316	65
367	75.4637	147
368	128.333	170
369	87.9917	100
370	101.577	167
371	146.626	129
372	143.579	137
373	93.8461	152
374	148.481	113
375	107.367	133
376	50.0812	83
377	27.9779	72
378	19.821	43
379	132.975	129
380	50.9459	93
381	68.1319	86
382	49.1142	67
383	26.5778	46
384	75.7306	133
385	27.8966	70
386	141.577	134
387	140.281	177
388	181.547	177
389	13.0927	25
390	208.37	256
391	237.547	248
392	41.3859	94
393	133.976	169
394	160.645	259
395	159.698	152
396	21.1379	39
397	188.397	184
398	25.963	59
399	325.877	253
400	69.876	106
401	89.7469	151
402	397.775	436
403	88.0918	131
404	85.8838	231
405	75.9268	91
406	109.044	167
407	53.8201	136
408	134.116	190
409	56.1234	150
410	220.19	207
411	99.1689	212
412	35.3822	61
413	145.301	275
414	219.964	198
415	153.941	166
416	115.051	188
417	51.9939	129
418	128.722	174
419	36.9145	65
420	85.3272	112
421	88.9717	173
422	51.3859	74
423	25.7721	69
424	84.2787	141
425	214.038	227
426	185.147	192
427	114.379	143
428	106.096	149
429	74.6058	157
430	246.645	190
431	127.326	123
432	81.1597	146
433	296.039	168
434	6.08942	19
435	110.212	139
436	19.3152	41
437	11.7077	23
438	78.3045	172
439	205.998	166
440	90.1278	143
441	62.1814	110
442	39.3283	83
443	50.6319	88
444	68.0822	187
445	39.3126	83
446	31.6391	77
447	111.26	176
448	25.6148	62
449	26.8641	69
450	87.9365	129
451	35.7345	99
452	142.273	120
453	118.558	227
454	83.1865	108
455	65.0701	182
456	116.445	157
457	104.336	203
458	170.216	186
459	169.693	161
460	88.7501	162
461	114.832	104
462	92.8991	160
463	24.599	57
464	171.5	151
465	78.9903	197
466	25.9791	45
467	135.721	261
468	20.5401	43
469	199.619	157
470	234.018	244
471	181.213	140
472	248.334	211
473	174.447	155
474	72.5488	79
475	143.363	190
476	111.044	189
477	235.946	190
478	158.854	265
479	54.3766	115
480	134.263	165
481	351.929	350
482	178.835	231
483	66.6938	157
484	120.012	193
485	16.6498	29
486	7.50572	16
487	73.008	118
488	80.9506	146
489	331.443	287
490	70.6322	146
491	99.7272	151
492	90.3486	236
493	229.614	185
494	94.6437	158
495	102.27	174
496	233.495	208
497	134.465	129
498	82.7102	138
499	28.7393	57
500	215.658	170
501	154.923	175
502	43.9632	139
503	128.969	177
504	32.2103	92
505	77.9838	100
506	153.442	140
507	123.89	219
508	91.0377	159
509	119.691	144
510	253.194	178
511	141.194	183
512	84.7991	131
513	113.252	181
514	164.304	299
515	30.9193	82
516	85.964	152
517	45.5526	73
518	134.294	237
519	122.219	174
520	76.5944	164
521	39.634	84
522	37.8091	58
523	352.811	315
524	165.82	286
525	145.014	311
526	124.846	196
527	197.268	286
528	261.739	293
529	152.164	293
530	52.76	162
531	63.3481	167
532	193.995	189
533	153.589	244
534	179.826	181
535	121.747	124
536	17.7114	38
537	164.922	128
538	143.802	115
539	154.352	199
540	80.838	123
541	96.2684	151
542	14.8984	37
543	230.622	251
544	40.8532	97
545	32.2083	63
546	55.0281	110
547	314.891	333
548	13.8502	26
549	15.2329	36
550	91.2934	171
551	81.6177	134
552	187.192	128
553	109.782	183
554	162.329	135
555	102.481	174
556	99.9804	154
557	74.2111	151
558	86.228	156
559	139.122	201
560	27.4138	47
561	63.243	134
562	250.561	228
563	99.91	177
564	162.944	183
565	92.1229	134
566	83.8514	167
567	214.882	267
568	110.355	157
569	12.0644	26
570	24.736	44
571	16.6828	27
572	90.2021	178
573	86.788	125
574	98.1115	139
575	72.4738	122
576	83.8377	198
577	121.149	159
578	54.0191	92
579	17.3138	38
580	29.2433	50
581	85.2552	155
582	61.4187	129
583	214.401	337
584	62.8316	99
585	74.0577	169
586	63.0537	158
587	246.146	215
588	164.047	176
589	238.792	206
590	27.3034	63
591	169.864	219
592	89.4225	129
593	208.713	180
594	77.3238	171
595	180.824	176
596	214.129	168
597	345.981	443
598	82.5451	142
599	207.846	225
600	76.7184	118
601	160.656	155
602	257.903	348
603	179.908	169
604	192.448	132
605	137.853	199
606	91.7155	158
607	146.142	259
608	214.646	228
609	159.884	134
610	237.317	246
611	200.59	164
612	20.7531	50
613	199.972	173
614	149.836	134
615	187.481	215
616	193.791	171
617	110.608	160
618	40.7303	100
619	37.8436	61
620	75.2596	135
621	81.3803	130
622	197.934	236
623	233.151	344
624	123.375	156
625	113.756	180
626	237.29	398
627	83.3957	147
628	107.151	155
629	96.8876	134
630	31.6572	68
631	57.5591	139
632	48.9136	72
633	68.6512	105
634	108.9	179
635	24.5237	47
636	35.6128	68
637	96.5353	172
638	40.3132	91
639	77.9086	136
640	136.457	166
641	46.8508	99
642	109.197	170
643	100.914	200
644	116.796	162
645	17.9841	38
646	117.128	213
647	93.9443	139
648	61.2971	148
649	52.2217	142
650	118.037	175
651	280.672	300
652	124.05	311
653	195.271	216
654	220.975	173
655	85.8608	153
656	52.8883	111
657	171.966	148
658	122.635	208
659	319.796	244
660	170.219	220
661	93.9083	149
662	152.194	332
663	200.861	158
664	163.665	180
665	254.856	218
666	51.8611	122
667	33.7616	61
668	167.839	279
669	164.266	127
670	310.994	355
671	191.713	169
672	66.4863	141
673	214.103	415
674	161.809	170
675	162.96	178
676	94.2315	161
677	31.8059	81
678	43.7296	85
679	149.316	185
680	89.2279	141
681	148.885	305
682	221.791	158
683	46.6688	80
684	111.471	144
685	101.804	163
686	68.6806	137
687	106.489	167
688	34.5548	85
689	150.715	181
690	84.9519	131
691	81.4793	149
692	14.0826	31
693	99.0719	155
694	21.023	36
695	123.713	193
696	101.411	253
697	112.09	185
698	65.8923	138
699	16.4247	32
700	382.884	348
701	73.1565	137
702	174.174	181
703	90.2802	182
704	97.3064	167
705	119.22	229
706	163.526	287
707	27.9593	86
708	152.13	256
709	151.574	119
710	176.197	152
711	152.517	142
712	26.7736	60
713	101.617	203
714	68.4759	112
715	76.1163	161
716	33.3353	66
717	41.8552	75
718	82.7177	178
719	294.322	341
720	254.481	267
721	297.2	301
722	132.44	113
723	93.6587	190
724	51.331	138
725	10.8795	21
726	205.527	217
727	123.723	319
728	236.093	201
729	170.105	177
730	86.4603	114
731	204.115	185
732	70.186	115
733	140.06	230
734	135.547	122
735	135.353	121
736	154.648	122
737	167.14	164
738	43.9752	86
739	79.9739	114
740	135.506	121
741	190.873	155
742	157.214	126
743	161.579	150
744	49.7552	107
745	153.636	120
746	165.885	172
747	131.078	121
748	155.276	211
749	160.082	154
750	90.9302	110
751	163.779	143
752	30.09	65
753	18.9771	47
754	41.4524	68
755	88.2439	139
756	79.0677	97
757	88.9781	118
758	15.5079	30
759	72.9511	174
760	114.441	204
761	166.737	147
762	221.796	309
763	33.9196	59
764	175.661	154
765	96.8793	182
766	139.324	148
767	130.644	106
768	148.465	251
769	188.987	149
770	245.744	308
771	110.938	161
772	134.307	206
773	86.243	174
774	141.568	309
775	93.1015	160
776	248.607	197
777	107.604	206
778	49.8079	97
779	67.5691	148
780	224.619	196
781	54.4086	98
782	99.0028	171
783	291.441	243
784	197.339	164
785	22.2647	51
786	108.447	194
787	77.6619	100
788	71.7989	125
789	201.753	172
790	209.542	171
791	73.4336	181
792	141.113	145
793	156.748	147
794	182.34	143
795	35.2551	79
796	85.7271	139
797	194.776	274
798	143.206	284
799	90.4527	120
800	143.393	118
801	28.5655	77
802	168.785	188
803	84.2803	159
804	161.975	217
805	155.132	149
806	127.598	166
807	186.903	174
808	135.204	282
809	182.236	221
810	140.872	152
811	244.018	269
812	260.996	307
813	212.028	199
814	81.0932	222
815	199.363	198
816	131.318	131
817	137.493	142
818	114.949	222
819	101.098	195
820	48.5654	147
821	100.472	146
822	148.675	129
823	51.9162	131
824	202.561	165
825	128.116	289
826	119.5	236
827	131	137
828	148.314	138
829	209.92	220
830	144.497	148
831	57.5614	161
832	114.01	153
833	258.035	273
834	173.428	230
835	28.7116	63
836	71.1283	178
837	92.8132	137
838	387.984	500
839	194.765	184
840	138.881	116
841	124.672	155
842	379.103	375
843	253.896	325
844	245.316	242
845	109.65	143
846	67.5322	103
847	151.155	214
848	268.618	229
849	218.148	189
850	79.3781	211
851	78.4668	165
852	139.843	201
853	230.027	241
854	154.264	218
855	150.817	172
856	49.857	128
857	134.723	156
858	127.912	132
859	135.295	278
860	192.474	422
861	334.747	336
862	228.35	391
863	109.138	202
864	142.075	283
865	50.3443	131
866	168.467	136
867	172.996	160
868	127.48	159
869	336.617	266
870	106.172	190
871	245.497	248
872	108.805	187
873	39.6093	96
874	176.309	149
875	109.928	178
876	118.263	156
877	150.719	255
878	15.0966	32
879	85.3439	131
880	220.699	444
881	49.1919	145
882	116.663	216
883	122.016	226
884	215.793	191
885	237.835	347
886	172.498	133
887	64.2987	136
888	39.5471	70
889	265.369	253
890	238.466	174
891	35.5019	85
892	222.954	243
893	212.978	183
894	77.6227	165
895	147.635	179
896	214.141	204
897	199.746	184
898	94.9129	152
899	56.2113	77
900	122.272	156
901	215.072	215
902	130.589	325
903	164.976	129
904	26.0924	55
905	131.655	191
906	35.5489	82
907	253.866	268
908	36.8318	96
909	226.419	204
910	156.707	195
911	214.441	228
912	12.2437	27
913	159.843	229
914	204.775	173
915	213.485	187
916	79.7061	126
917	174.171	189
918	105.342	170
919	175.523	154
920	266.755	225
921	129.511	138
922	116.552	229
923	167.18	125
924	108.591	186
925	125.554	214
926	74.0046	113
927	157.111	259
928	115.537	187
929	200.515	311
930	18.3017	32
931	216.488	174
932	236.024	162
933	131.621	309
934	149.345	297
935	90.4152	146
936	208.368	311
937	142.975	148
938	169.557	158
939	170.95	173
940	180.681	153
941	85.3669	192
942	101.919	196
943	250.247	231
944	190.514	157
945	189.203	169
946	176.817	181
947	172.122	199
948	29.9689	60
949	88.4892	110
950	37.165	95
951	199.885	334
952	126.584	135
953	133.801	130
954	163.577	299
955	154.352	132
956	176.658	160
957	145.387	146
958	129.384	117
959	129.516	202
960	130.109	199
961	129.559	133
962	150.395	160
963	159.882	146
964	316.215	340
965	69.8525	183
966	289.489	242
967	69.7267	120
968	100.13	143
969	242.249	245
970	282.416	239
971	208.603	270
972	186.193	191
973	244.812	195
974	144.845	199
975	53.6059	134
976	223.879	163
977	139.368	254
978	150.845	188
979	55.4939	150
980	260.838	237
981	250.068	204
982	130.492	147
983	83.6961	176
984	169.476	200
985	202.077	142
986	174.525	148
987	224.015	217
988	94.8056	155
989	265.675	199
990	34.2491	66
991	104.474	156
992	229.007	203
993	15.9909	33
994	193.756	186
995	67.8321	198
996	42.0437	134
997	99.26	222
998	24.4819	59
999	243.522	197
