# Supplementary material
Source: ML conference proceedings conference paper supplement (https://openreview.net/forum?id=3MiADMHY62)
Supplement: supplementary_material [file tvf_and_tcf_data_with_uncertainity_new_way_eps_1.xlsx]

## Sheet: Sheet1
	reward	cost
0	11	5.84956
1	17	8.29513
2	14	7.26382
3	12	4.77331
4	25	12.4369
5	13	5.57562
6	24	10.3509
7	12	5.19145
8	13	7.26428
9	12	7.43225
10	16	8.09345
11	10	3.20257
12	16	6.90651
13	14	5.41587
14	21	11.1702
15	16	7.24522
16	12	5.94532
17	35	17.1455
18	10	4.9749
19	12	5.11886
20	13	5.63205
21	12	6.97395
22	16	6.41139
23	19	9.18209
24	10	6.60118
25	19	9.97079
26	23	13.1216
27	12	5.06481
28	38	21.6141
29	12	4.94794
30	13	6.4415
31	18	8.14266
32	12	6.3344
33	20	9.42206
34	15	6.46452
35	15	4.45192
36	9	4.56147
37	14	5.75612
38	22	15.101
39	11	4.70569
40	17	7.30947
41	13	8.2728
42	13	6.45704
43	31	15.0146
44	17	8.46184
45	22	8.99989
46	25	12.766
47	9	3.71417
48	33	15.2556
49	15	5.35275
50	21	11.4295
51	14	7.34351
52	19	9.00767
53	11	6.0609
54	19	9.06182
55	9	2.97183
56	18	9.18658
57	10	4.6946
58	34	12.2434
59	40	19.2418
60	17	6.70881
61	11	4.21091
62	25	10.2021
63	21	11.9426
64	38	18.185
65	16	8.14406
66	22	9.29921
67	19	10.537
68	28	11.046
69	35	18.8682
70	16	7.78257
71	21	12.029
72	14	7.30371
73	23	9.45328
74	74	48.1387
75	19	9.59764
76	14	5.76558
77	29	18.2521
78	11	3.935
79	18	9.86604
80	30	15.2246
81	45	26.4144
82	20	11.8033
83	35	14.2777
84	12	6.76952
85	20	9.93694
86	9	3.1108
87	29	15.4375
88	22	12.3192
89	21	11.7675
90	13	6.7185
91	27	13.7631
92	29	17.0041
93	32	18.557
94	20	8.13313
95	31	13.4425
96	81	61.8459
97	70	34.7049
98	28	14.9721
99	38	16.0131
100	36	16.8033
101	52	33.4312
102	11	6.67685
103	69	34.1914
104	19	8.50226
105	33	17.5047
106	38	18.7602
107	21	11.5336
108	23	13.4001
109	52	20.9213
110	30	19.291
111	41	19.2948
112	53	23.4978
113	30	15.6284
114	48	27.064
115	32	16.0882
116	63	28.0873
117	32	14.8106
118	37	18.7107
119	65	34.3378
120	115	101.903
121	32	13.8618
122	25	10.2093
123	69	30.3155
124	22	11.13
125	79	44.3061
126	72	43.2022
127	47	27.6439
128	19	8.03578
129	47	28.8052
130	70	44.9504
131	88	37.6125
132	31	14.4018
133	32	13.8527
134	52	23.67
135	24	11.2058
136	54	24.1814
137	58	28.1875
138	86	39.448
139	96	64.0714
140	103	63.6043
141	74	38.2014
142	32	17.3545
143	26	16.4035
144	22	9.05492
145	46	23.9511
146	89	44.6513
147	89	73.0705
148	58	29.265
149	58	23.9898
150	32	14.1327
151	21	12.831
152	62	36.3279
153	53	31.0469
154	56	31.2429
155	25	10.8544
156	25	12.7111
157	43	24.304
158	25	14.1828
159	41	22.144
160	65	30.1615
161	43	25.1182
162	70	47.327
163	37	19.9137
164	69	30.3902
165	23	13.6205
166	24	12.2711
167	54	25.4559
168	20	13.7066
169	52	25.7078
170	66	29.3638
171	34	16.3743
172	35	21.3917
173	75	39.8114
174	113	73.7995
175	27	14.4329
176	169	51.5943
177	45	22.9661
178	103	41.1481
179	78	32.7683
180	55	21.778
181	55	34.5517
182	102	41.6619
183	67	34.0508
184	32	15.4875
185	89	34.4623
186	31	13.4401
187	28	15.0914
188	39	16.5636
189	60	29.8341
190	26	11.2549
191	17	8.37726
192	29	12.0595
193	53	30.8391
194	76	30.4846
195	25	12.4985
196	48	24.2932
197	92	56.9597
198	28	14.5093
199	59	31.6949
200	28	10.1667
201	79	49.0833
202	89	59.8387
203	30	10.6208
204	28	13.545
205	59	24.9099
206	48	28.9103
207	47	17.9801
208	38	17.1983
209	68	34.4258
210	29	13.7429
211	68	44.7456
212	48	31.4509
213	68	31.0689
214	14	8.32582
215	75	53.3648
216	36	20.0482
217	81	34.8308
218	35	14.9175
219	22	12.111
220	81	32.0023
221	78	34.2099
222	42	19.5247
223	63	38.368
224	52	21.0859
225	103	37.8304
226	57	31.9886
227	49	30.3192
228	39	21.7131
229	52	24.2078
230	105	86.115
231	150	122.534
232	92	45.8332
233	66	30.7771
234	37	16.4704
235	36	17.2938
236	39	24.8472
237	77	32.7266
238	26	14.1343
239	32	16.8474
240	55	27.5617
241	86	36.495
242	130	105.162
243	52	29.54
244	69	37.9579
245	52	23.7931
246	93	37.2423
247	55	27.2774
248	43	30.7007
249	89	30.3929
250	68	29.1663
251	41	14.8023
252	132	108.789
253	120	72.8961
254	39	14.5612
255	40	23.748
256	59	25.7258
257	57	37.5983
258	36	21.7299
259	42	23.7809
260	35	20.4102
261	59	27.6453
262	113	113.36
263	114	53.9422
264	70	32.4135
265	28	14.3438
266	87	54.5637
267	90	38.129
268	157	177.894
269	52	26.5807
270	88	72.6362
271	139	143.803
272	56	29.7353
273	115	60.2799
274	134	54.1759
275	47	23.5112
276	50	23.8956
277	37	17.7345
278	18	8.65763
279	69	47.6798
280	179	64.2415
281	198	125.965
282	111	84.9147
283	77	29.0354
284	74	37.3219
285	141	86.5226
286	55	29.3933
287	43	18.7283
288	50	23.7555
289	181	152.762
290	57	27.5879
291	25	10.4819
292	133	87.7385
293	52	21.8096
294	217	197.427
295	49	23.7959
296	119	78.8786
297	153	113.088
298	119	73.314
299	62	30.6938
300	29	16.1007
301	68	33.4967
302	252	156.542
303	209	222.717
304	117	61.1643
305	81	30.9019
306	59	25.3712
307	178	207.975
308	112	69.4635
309	148	165.342
310	43	22.1438
311	88	32.2213
312	46	26.6215
313	149	98.1306
314	167	191.004
315	177	148.127
316	147	154.387
317	182	82.7319
318	162	154.516
319	83	69.1028
320	21	9.815
321	149	175.092
322	119	89.804
323	93	34.3357
324	177	130.584
325	137	115.754
326	175	99.4439
327	31	10.7227
328	170	93.5976
329	51	29.6521
330	121	66.4168
331	150	179.488
332	34	13.7836
333	118	64.8787
334	229	227.315
335	238	226.553
336	182	193.97
337	185	181.811
338	121	55.5535
339	70	31.7192
340	60	33.4553
341	257	253.661
342	152	82.3224
343	98	65.1955
344	120	66.5572
345	201	153.542
346	163	69.7274
347	98	80.7576
348	123	134.137
349	132	55.644
350	42	15.3465
351	142	49.6497
352	146	52.2016
353	52	38.0243
354	37	19.9922
355	122	141.165
356	101	43.4597
357	134	104.409
358	124	56.2433
359	103	64.7106
360	207	216.118
361	198	130.46
362	213	145.651
363	220	247.675
364	97	56.6593
365	182	173.468
366	108	108.347
367	68	34.6178
368	125	43.8042
369	95	43.4407
370	61	28.8566
371	34	15.8499
372	24	10.1307
373	117	50.368
374	39	23.1171
375	242	237.929
376	76	25.6125
377	36	18.7028
378	44	27.7844
379	70	51.9397
380	79	38.6116
381	288	134.582
382	108	71.1149
383	59	23.6399
384	106	69.7574
385	32	19.9536
386	199	121.859
387	197	99.0084
388	84	77.2271
389	104	101.66
390	130	111.543
391	173	119.547
392	74	49.0681
393	135	53.9634
394	256	234.935
395	217	137.446
396	238	174.464
397	272	172.055
398	34	14.7078
399	207	155.55
400	121	75.3502
401	195	90.3209
402	277	121.713
403	88	36.6364
404	121	47.878
405	217	141.644
406	269	138.773
407	26	11.8114
408	143	107.04
409	230	116.173
410	38	14.7867
411	134	91.4895
412	192	128.691
413	119	78.8324
414	98	68.7993
415	114	66.0579
416	57	31.2495
417	289	182.941
418	159	108.683
419	57	31.2838
420	41	19.8295
421	129	67.9858
422	259	230.74
423	28	14.9746
424	38	17.2787
425	117	109.236
426	146	91.8211
427	232	191.63
428	216	193.085
429	150	105.47
430	164	135.37
431	123	82.7075
432	206	197.157
433	140	130.894
434	106	131.658
435	89	72.0384
436	143	111.042
437	109	133.172
438	85	26.7099
439	119	105.052
440	80	39.7406
441	106	133.575
442	278	252.599
443	155	227.179
444	235	165.366
445	160	165.028
446	120	81.0251
447	211	201.521
448	122	79.196
449	172	178.397
450	217	190.633
451	192	125.142
452	219	247.508
453	33	15.6085
454	46	19.3006
455	128	80.3033
456	98	67.9873
457	153	81.5639
458	97	59.7813
459	225	229.55
460	186	158.986
461	281	235.861
462	150	170.062
463	143	83.0373
464	201	199.265
465	214	176.743
466	221	88.9504
467	125	165.931
468	166	125.268
469	300	234.848
470	260	119.669
471	139	144.695
472	215	250.015
473	88	57.1064
474	112	128.584
475	228	134.919
476	124	83.0111
477	141	86.4735
478	276	187.41
479	218	145.459
480	185	118.603
481	232	133.968
482	42	16.4745
483	150	185.155
484	204	161.948
485	191	102.698
486	243	167.348
487	106	67.7657
488	181	217.656
489	245	179.434
490	255	266.824
491	107	101.976
492	179	230.87
493	181	185.369
494	154	176.065
495	157	191.55
496	141	166.799
497	32	12.8681
498	264	168.405
499	122	87.7147
500	153	183.491
501	290	217.612
502	185	162.425
503	93	49.2305
504	80	32.8151
505	166	166.578
506	203	157.807
507	152	197.53
508	151	180.625
509	247	255.601
510	201	197.185
511	148	88.0033
512	223	148.451
513	253	167.265
514	245	177.33
515	136	90.9022
516	175	104.954
517	171	242.209
518	141	58.7332
519	84	43.5789
520	123	78.7117
521	189	88.3346
522	169	118.092
523	144	90.3989
524	141	78.6367
525	162	96.5095
526	128	59.3672
527	101	64.0542
528	130	81.4057
529	254	99.5771
530	116	76.0967
531	118	53.0659
532	101	47.4923
533	188	129.919
534	168	76.5855
535	183	112.109
536	50	26.2976
537	133	49.5961
538	200	149.358
539	193	162.631
540	217	124.095
541	138	95.3354
542	207	103.987
543	209	198.05
544	234	259.404
545	97	74.9693
546	76	28.1191
547	229	207.517
548	84	34.4
549	157	181.604
550	149	180.442
551	127	127.678
552	164	60.8202
553	110	119.291
554	106	126.108
555	152	187.281
556	130	139.755
557	116	143.426
558	45	22.0444
559	23	12.0714
560	38	19.874
561	121	133.81
562	82	81.0891
563	120	118.037
564	26	12.1962
565	160	103.091
566	125	150.846
567	224	235.773
568	106	65.8657
569	269	166.019
570	220	241.202
571	74	35.129
572	232	145.525
573	184	276.113
574	160	89.5546
575	133	99.4547
576	164	101.394
577	125	112.908
578	148	67.4712
579	108	118.356
580	106	116.055
581	147	83.5462
582	138	97.4974
583	197	254.401
584	186	192.734
585	135	90.1513
586	183	100.732
587	132	69.2683
588	122	52.1824
589	212	116.583
590	300	258.409
591	132	90.6491
592	170	107.187
593	157	77.0286
594	131	89.2229
595	167	114.523
596	233	145.467
597	113	75.6257
598	114	56.9876
599	198	174.498
600	72	31.7231
601	242	179.49
602	128	83.446
603	77	31.0701
604	215	252.169
605	66	40.2678
606	265	228.753
607	196	219.291
608	271	200.824
609	215	218.115
610	161	65.8299
611	118	71.9108
612	118	136.733
613	128	53.9225
614	266	154.111
615	116	37.1103
616	210	134.751
617	166	208.333
618	179	144.802
619	203	127.493
620	255	154.28
621	211	234.933
622	247	235.721
623	196	148.156
624	197	313.902
625	157	93.624
626	260	194.452
627	206	240.07
628	202	175.758
629	138	61.3143
630	226	102.141
631	148	199.916
632	121	52.3111
633	205	173.704
634	164	139.476
635	166	119.85
636	197	190.094
637	58	29.3222
638	40	18.2453
639	222	139.869
640	117	46.0259
641	150	119.114
642	49	22.7442
643	131	73.5009
644	186	164.25
645	148	111.276
646	202	163.3
647	132	92.0935
648	239	155.788
649	149	106.699
650	158	83.5233
651	170	79.9277
652	261	156.804
653	99	60.3689
654	86	65.5424
655	161	194.865
656	84	60.4996
657	256	162.252
658	289	187.366
659	228	130.779
660	191	153.448
661	152	156.685
662	160	117.415
663	175	116.531
664	279	220.521
665	91	43.2207
666	144	86.6649
667	81	58.3606
668	200	147.329
669	114	53.4073
670	181	204.747
671	179	94.3972
672	285	214.372
673	81	51.2567
674	153	135.458
675	208	123.227
676	241	236.095
677	211	249.143
678	195	169.623
679	175	170.79
680	264	150.337
681	158	103.675
682	150	176.01
683	239	212.513
684	202	188.087
685	233	147.352
686	156	188.479
687	93	47.9815
688	146	175.766
689	191	165.46
690	55	31.9354
691	213	109.386
692	131	145.818
693	81	57.5873
694	250	249.06
695	196	254.845
696	282	237.704
697	153	83.1291
698	224	300.592
699	217	184.195
700	202	202.141
701	177	110.84
702	144	95.8642
703	180	177.237
704	210	127.286
705	128	74.9025
706	272	240.514
707	130	63.8704
708	260	183.503
709	193	86.0665
710	133	82.0296
711	186	134.675
712	183	107.659
713	163	180.734
714	95	96.9632
715	191	194.522
716	165	132.389
717	268	196.32
718	75	32.8121
719	167	98.7419
720	231	176.17
721	225	110.936
722	186	143.87
723	175	95.9743
724	225	147.104
725	163	98.387
726	114	82.4844
727	149	95.3642
728	162	105.399
729	59	30.9008
730	260	263.244
731	164	109.386
732	159	93.0246
733	148	54.2876
734	130	83.662
735	150	201.411
736	160	68.1308
737	172	169.535
738	123	144.084
739	144	87.0818
740	170	179.67
741	284	157.318
742	202	215.607
743	260	241.406
744	185	165.968
745	130	65.4534
746	154	161.566
747	70	38.5325
748	236	232.231
749	290	154.38
750	175	188.885
751	249	237.041
752	202	189.648
753	293	140.065
754	187	228.893
755	165	71.3189
756	206	223.971
757	177	90.503
758	188	75.2571
759	241	216.383
760	210	197.891
761	285	229.918
762	171	126.707
763	225	105.852
764	261	196.629
765	292	191.56
766	124	164.23
767	209	184.886
768	217	214.053
769	204	171.289
770	154	152.457
771	256	172.184
772	182	86.095
773	228	236.747
774	168	213.479
775	172	211.316
776	275	269.217
777	256	173.971
778	195	196.607
779	223	241.119
780	181	213.944
781	202	201.589
782	158	126.702
783	139	180.161
784	96	38.1217
785	180	64.5567
786	116	134.787
787	188	222.186
788	187	178.121
789	197	228.868
790	195	136.012
791	197	266.439
792	256	175.825
793	189	157.124
794	233	112.122
795	189	197.648
796	223	235.061
797	162	107.51
798	207	138.788
799	235	184.969
800	207	148.685
801	167	55.6697
802	191	190.72
803	103	92.5391
804	109	120.898
805	208	107.68
806	230	136.819
807	136	67.6007
808	196	138.757
809	300	158.86
810	148	88.0888
811	163	189.086
812	68	35.5864
813	116	61.5507
814	125	73.135
815	169	175.253
816	221	118.224
817	196	113.187
818	214	197.942
819	158	133.291
820	162	58.2815
821	121	72.7898
822	217	151.574
823	163	121.083
824	287	104.62
825	244	106.011
826	190	97.5001
827	287	115.836
828	200	91.1805
829	140	91.9229
830	150	108.52
831	42	22.3749
832	185	107.198
833	22	12.867
834	172	102.776
835	205	107.322
836	218	181.932
837	189	101.87
838	135	109.429
839	111	69.1082
840	140	67.0692
841	39	19.8164
842	210	122.589
843	132	92.9838
844	168	189.251
845	172	199.814
846	142	92.4397
847	194	109.369
848	108	46.2117
849	191	92.5065
850	188	168.853
851	121	46.8912
852	239	119.103
853	238	196.188
854	202	140.224
855	294	161.047
856	109	123.231
857	205	94.4838
858	163	181.461
859	230	105.791
860	139	86.5279
861	243	122.24
862	157	189.725
863	132	169.421
864	182	132.262
865	264	175.794
866	200	119.652
867	215	102.421
868	273	177.295
869	173	54.7305
870	183	183.579
871	292	98.2106
872	208	135.091
873	216	191.52
874	176	194.369
875	181	119.729
876	284	194.536
877	155	104.416
878	236	129.963
879	188	112.866
880	198	149.901
881	180	152.208
882	246	181.434
883	187	153.1
884	211	132.847
885	233	198.089
886	189	122.847
887	274	145.861
888	162	191.585
889	182	185.723
890	263	139.028
891	90	31.5155
892	210	84.6471
893	130	83.7342
894	234	154.108
895	212	119.865
896	189	123.645
897	177	80.7928
898	213	145.882
899	146	109.129
900	198	159.673
901	199	145.814
902	185	133.488
903	240	148.144
904	188	148.369
905	80	72.1595
906	173	96.0938
907	195	72.3998
908	148	85.3214
909	262	119.043
910	230	154.634
911	120	63.7394
912	274	150.387
913	176	111.599
914	170	140.006
915	207	119.123
916	250	166.937
917	242	108.841
918	205	145.439
919	295	182.508
920	76	63.3959
921	59	38.2444
922	255	168.701
923	238	174.875
924	122	92.362
925	196	199.241
926	109	55.7148
927	193	159.933
928	116	65.8865
929	162	55.3762
930	181	187.708
931	182	162.2
932	201	138.099
933	287	119.024
934	201	125.638
935	222	115.674
936	242	160.796
937	128	55.7301
938	201	197.383
939	184	122.95
940	177	128.764
941	275	153.402
942	287	182.271
943	224	126.019
944	98	62.162
945	187	119.38
946	241	187.534
947	148	71.3715
948	228	189.067
949	255	127.33
950	240	148.641
951	93	69.8948
952	178	72.884
953	197	132.016
954	117	69.5093
955	159	126.88
956	166	99.5248
957	218	146.322
958	205	158.086
959	52	28.5254
960	210	157.785
961	196	100.019
962	176	165.381
963	261	137.288
964	194	142.248
965	256	138.474
966	245	165.137
967	276	158.444
968	271	116.95
969	215	157.839
970	66	46.5389
971	213	191.922
972	173	141.009
973	204	150.909
974	109	130.72
975	122	55.7787
976	202	122.875
977	289	131.757
978	269	136.312
979	292	155.425
980	193	170.162
981	160	110.227
982	297	168.912
983	293	165.537
984	193	106.621
985	241	155.185
986	188	190.879
987	280	172.669
988	114	137.946
989	81	64.1964
990	184	146.81
991	201	119.204
992	239	126.761
993	170	65.3203
994	232	94.25
995	167	115.248
996	250	104.512
997	205	118.419
998	176	74.5422
999	255	124.974
