# Supplementary material
Source: ML conference proceedings conference paper supplement (https://openreview.net/forum?id=3MiADMHY62)

# Objective function (Modified Frozenlake)

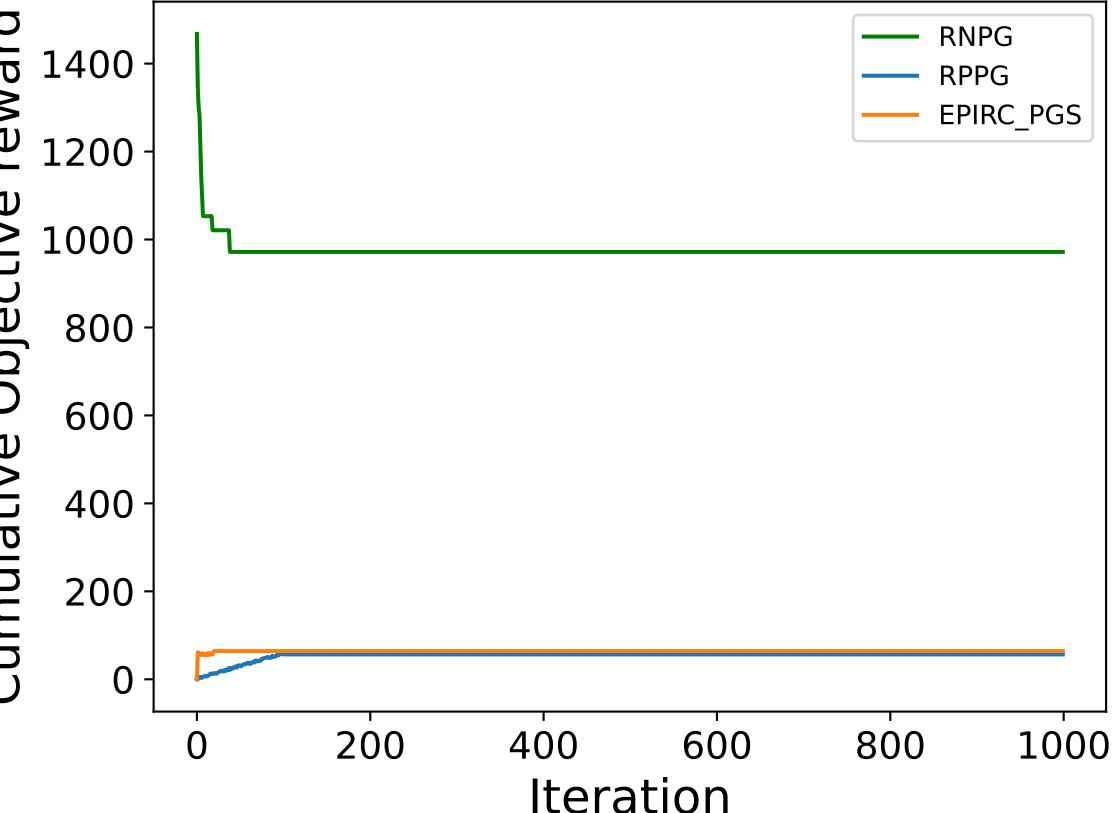

Supplement: supplementary_material [file Vf_update_MFL.pdf › RNPG-main/After_rebuttal_questions/RNPG/Vf_update_MFL.pdf]
