# Supplementary material
Source: ML conference proceedings conference paper supplement (https://openreview.net/forum?id=3MiADMHY62)

# Constraint function

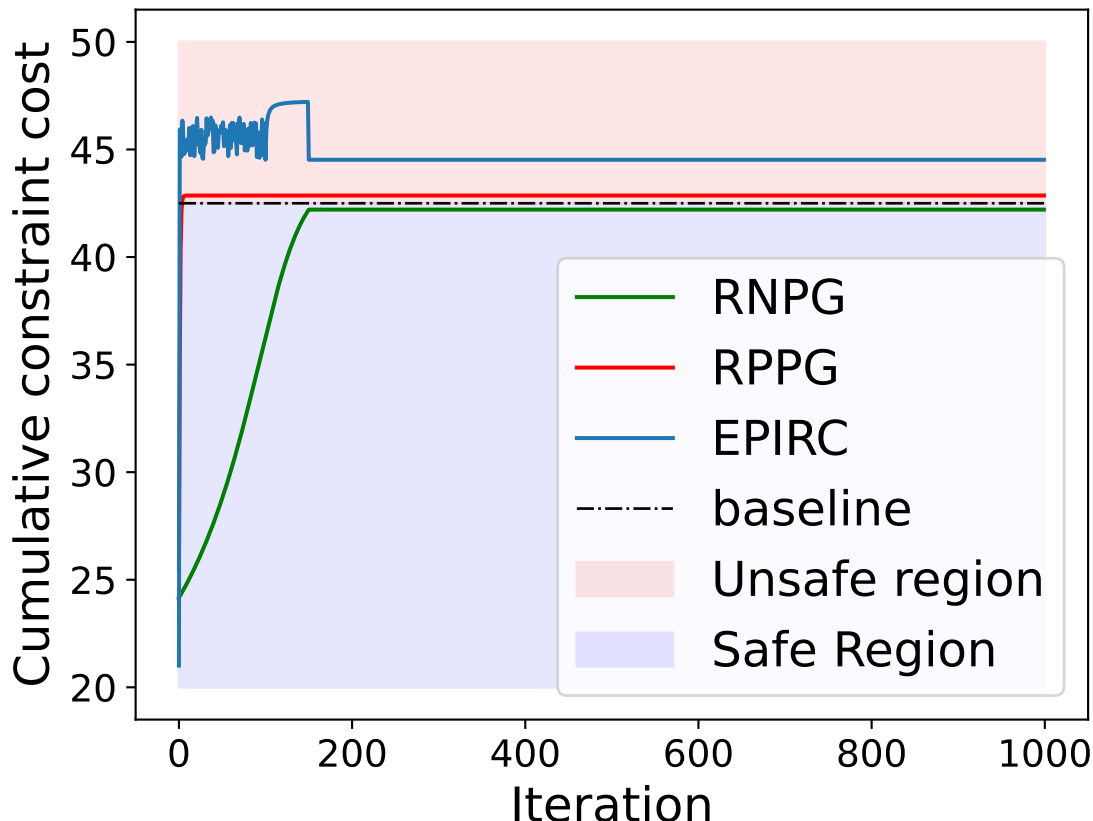

Supplement: supplementary_material [file CF_update_CRS.pdf › RNPG-main/CF_update_CRS.pdf]

# Constraint function

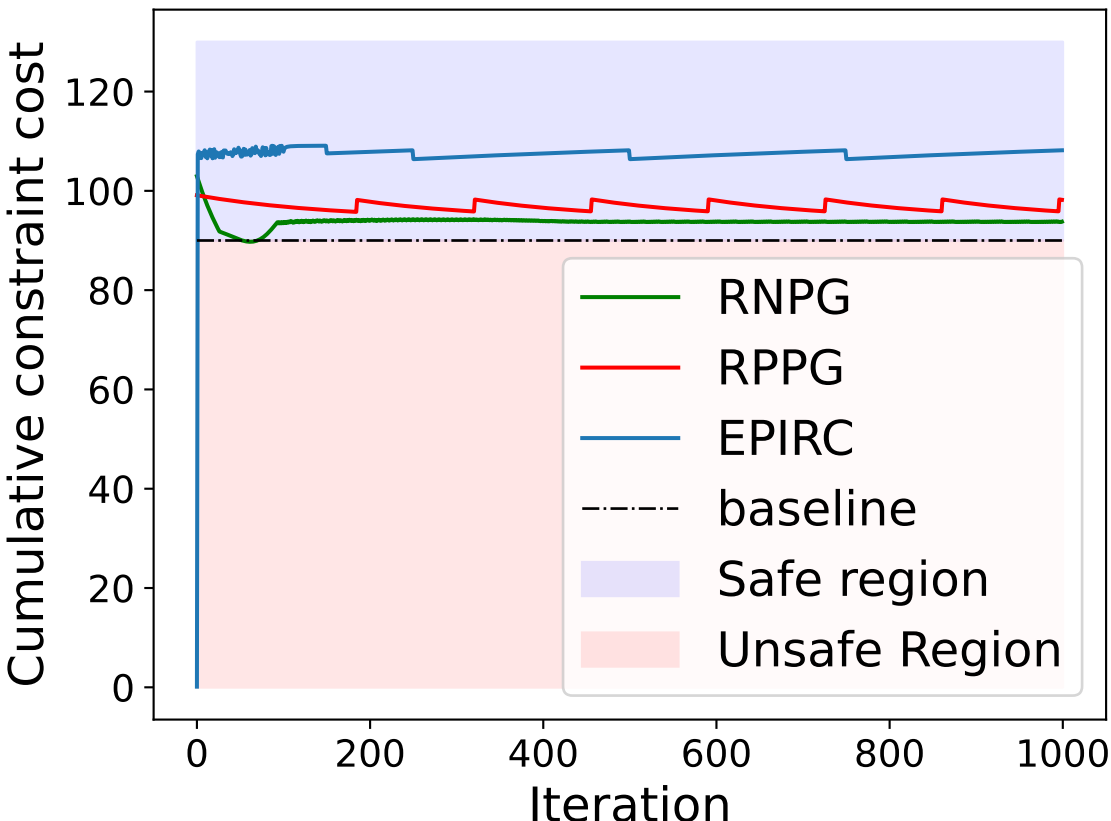

Supplement: supplementary_material [file CF_update_Garnet.pdf › RNPG-main/CF_update_Garnet.pdf]

# Constraint function

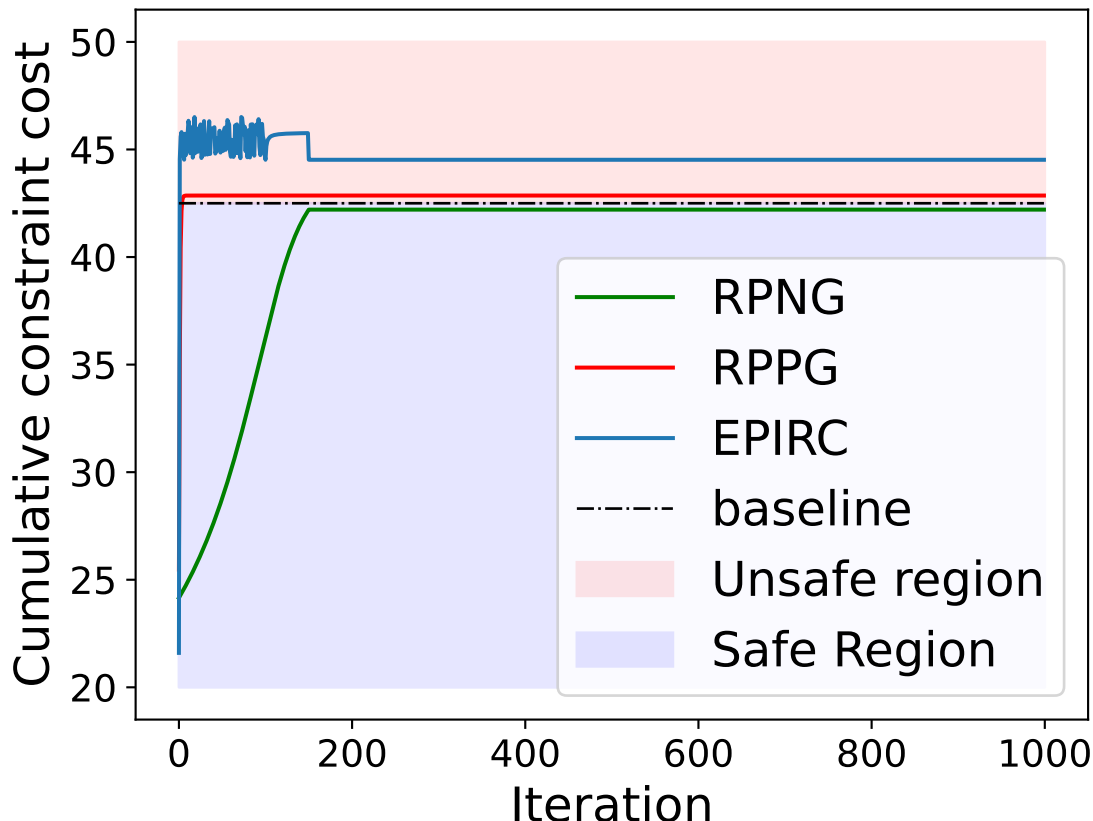

Supplement: supplementary_material [file CF_update_RS.pdf › RNPG-main/CF_update_RS.pdf]

# Effect of lambda(RNPG)

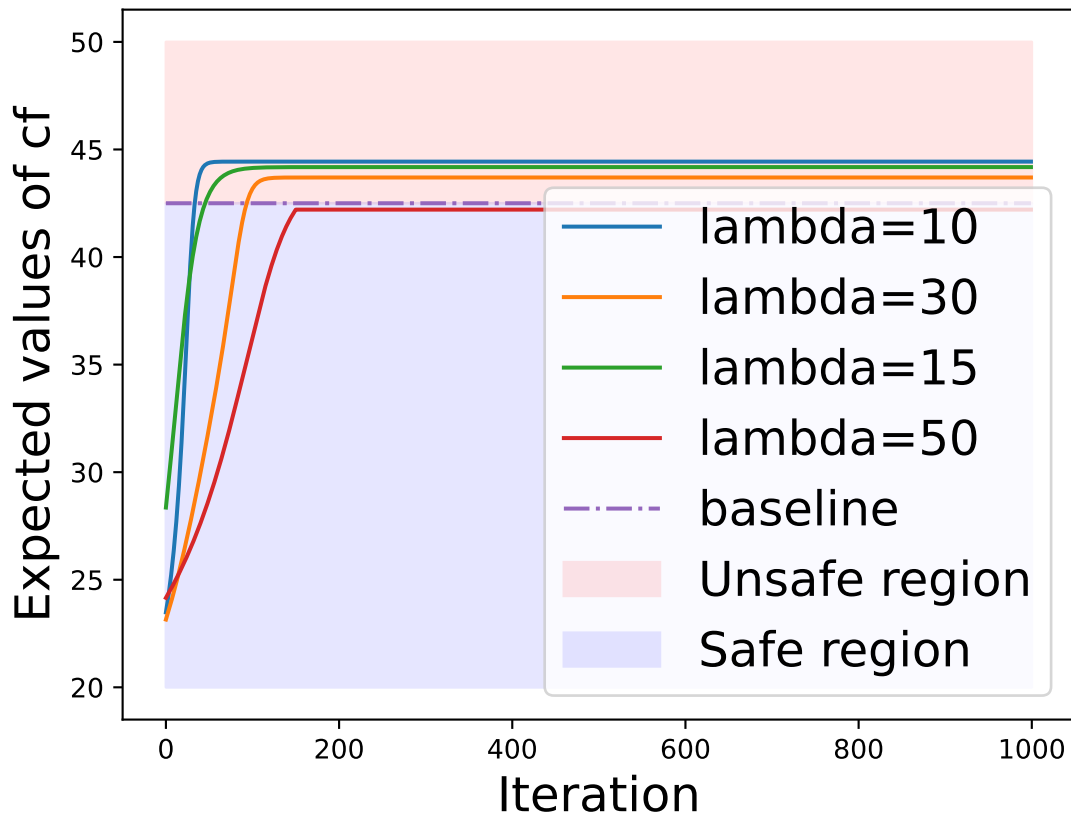

Supplement: supplementary_material [file Comparison for Cost functions.pdf › RNPG-main/Comparison for Cost functions.pdf]

# Effect of lambda(RNPG)

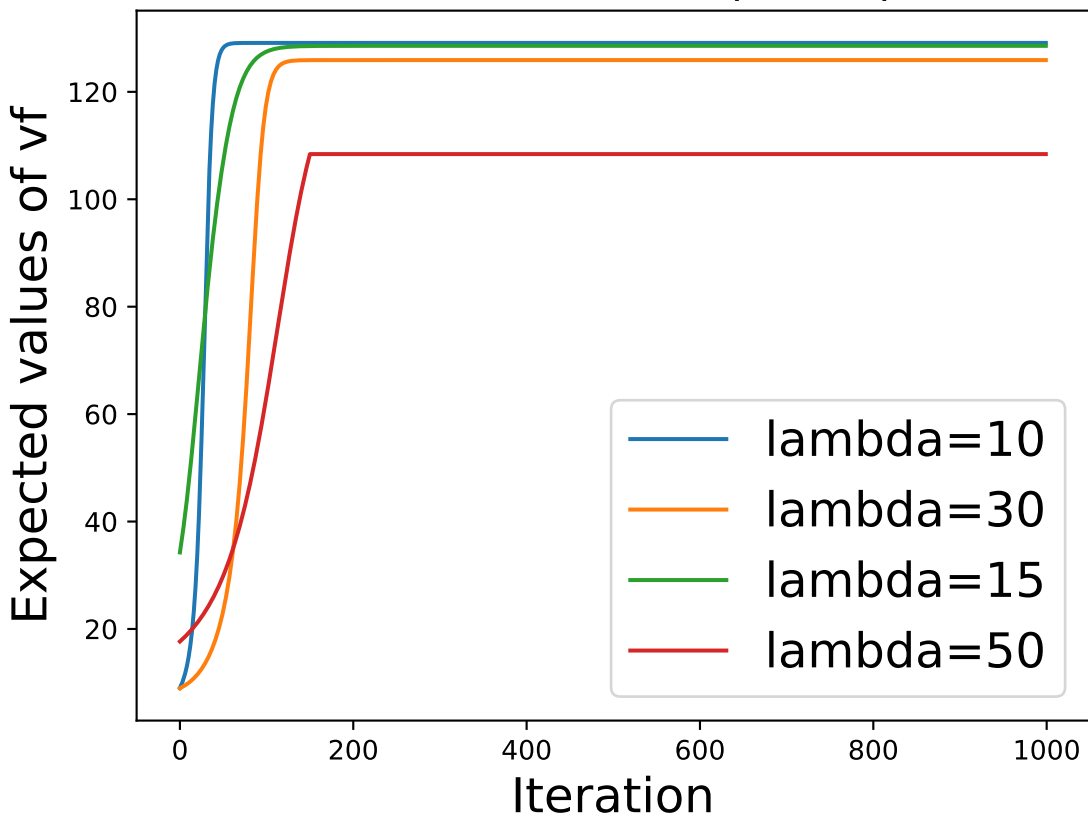

Supplement: supplementary_material [file Comparison for Value functions.pdf › RNPG-main/Comparison for Value functions.pdf]

# Constraint function (Modified Frozenlake)

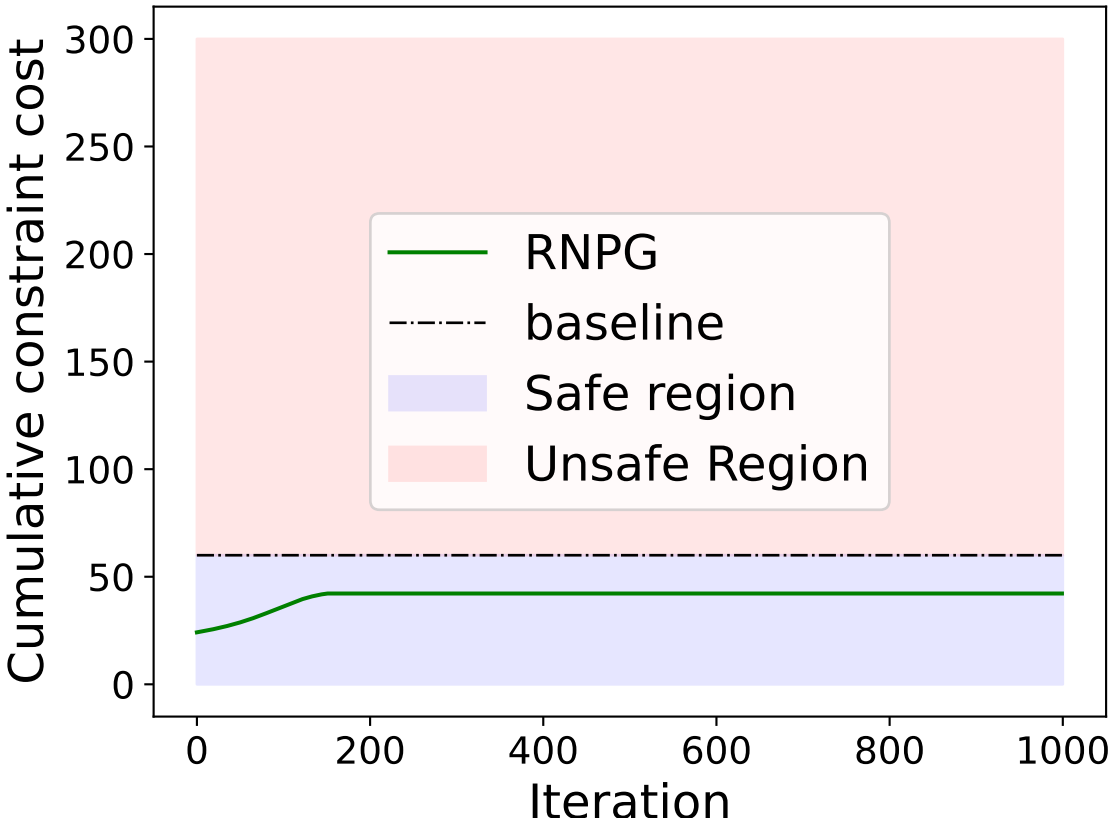

Supplement: supplementary_material [file CF_update_Gridworld.pdf › RNPG-main/Frozenlake/CF_update_Gridworld.pdf]

# Constraint function (Modified Frozenlake)

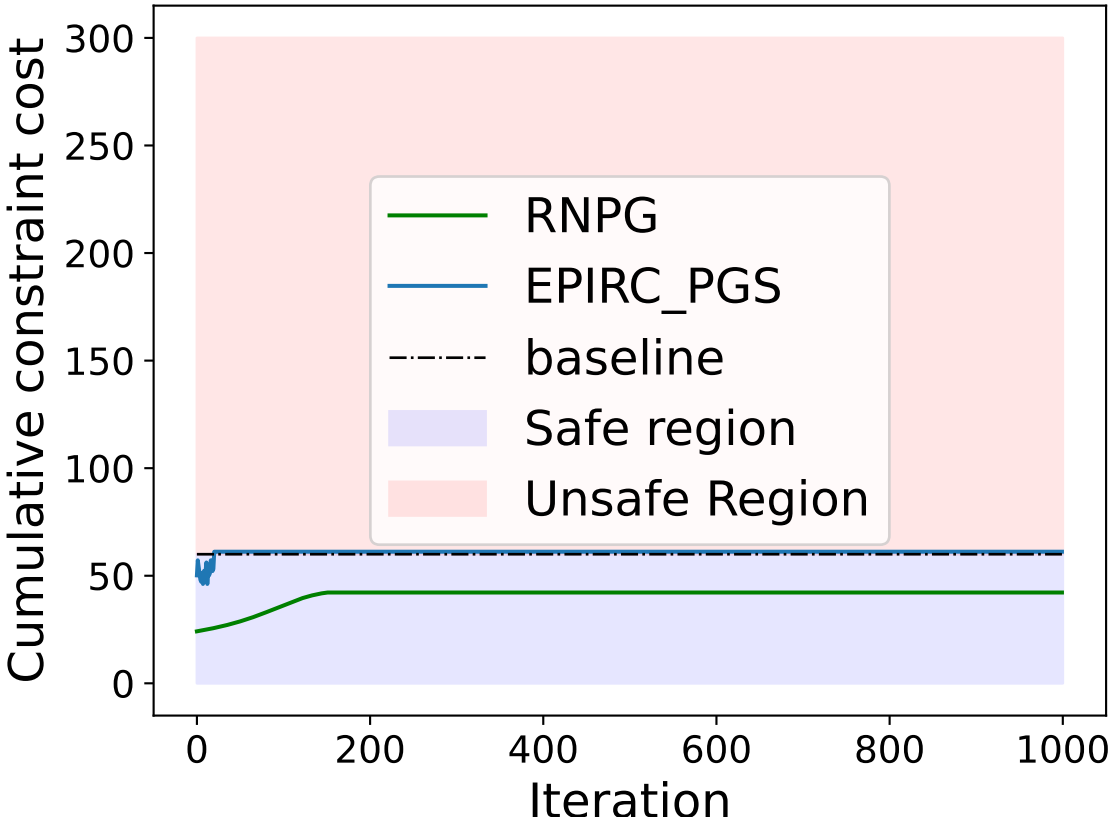

Supplement: supplementary_material [file CF_update_MFL.pdf › RNPG-main/Frozenlake/CF_update_MFL.pdf]

# Objective function (Modified Frozenlake)

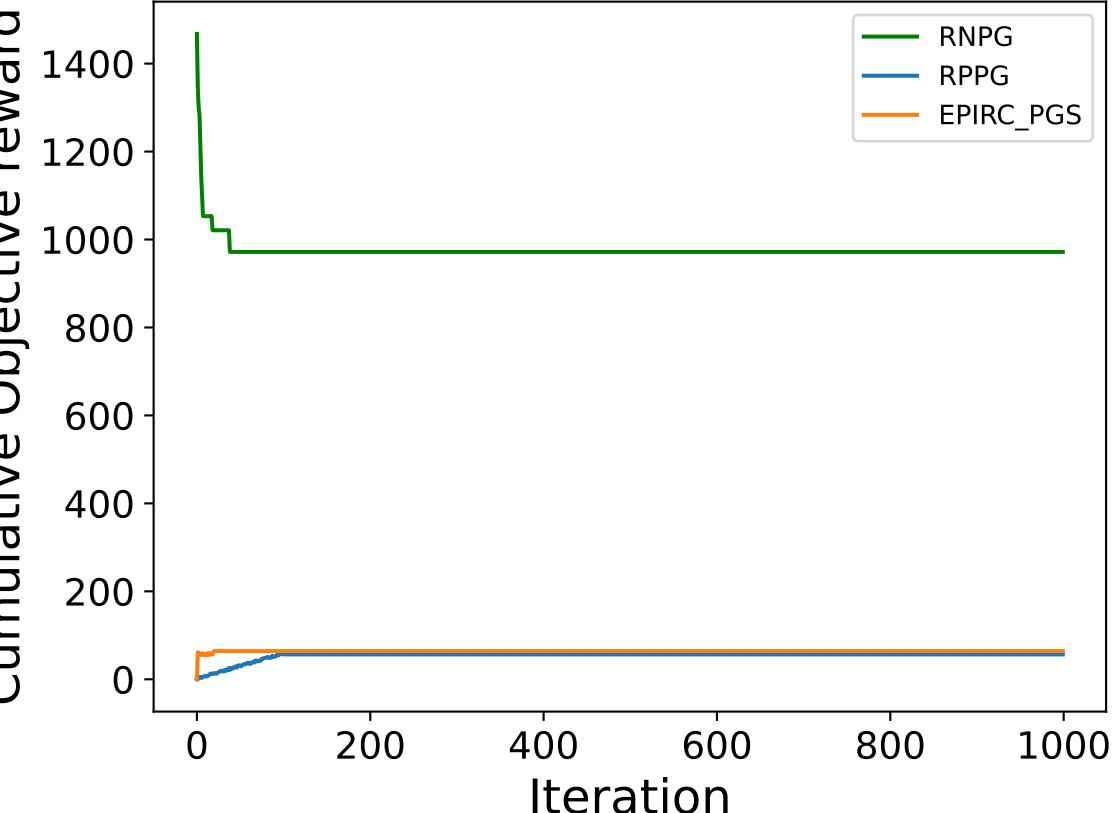

Supplement: supplementary_material [file Vf_update_MFL.pdf › RNPG-main/Frozenlake/Vf_update_MFL.pdf]

Constraint function (Garbage collector)

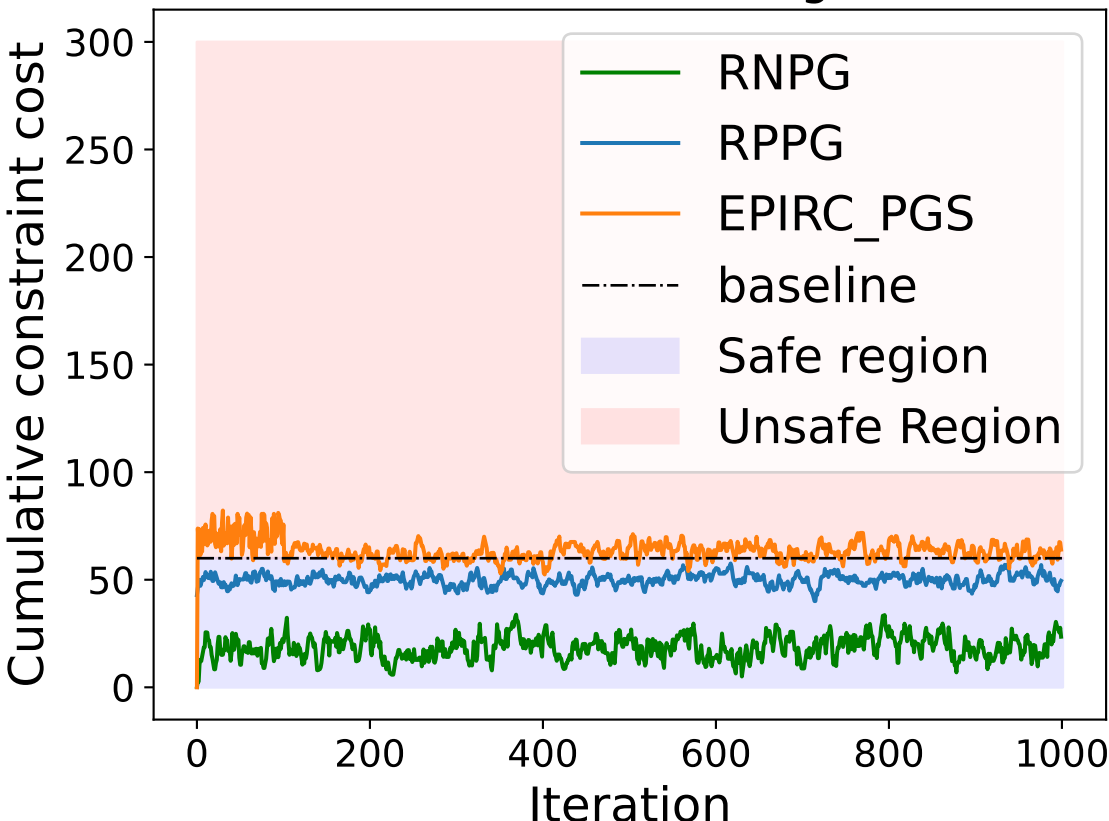

Supplement: supplementary_material [file CF_update_GC.pdf › RNPG-main/Garbage_cleaning_bot/CF_update_GC.pdf]

Objective function (Garbage\_collector)

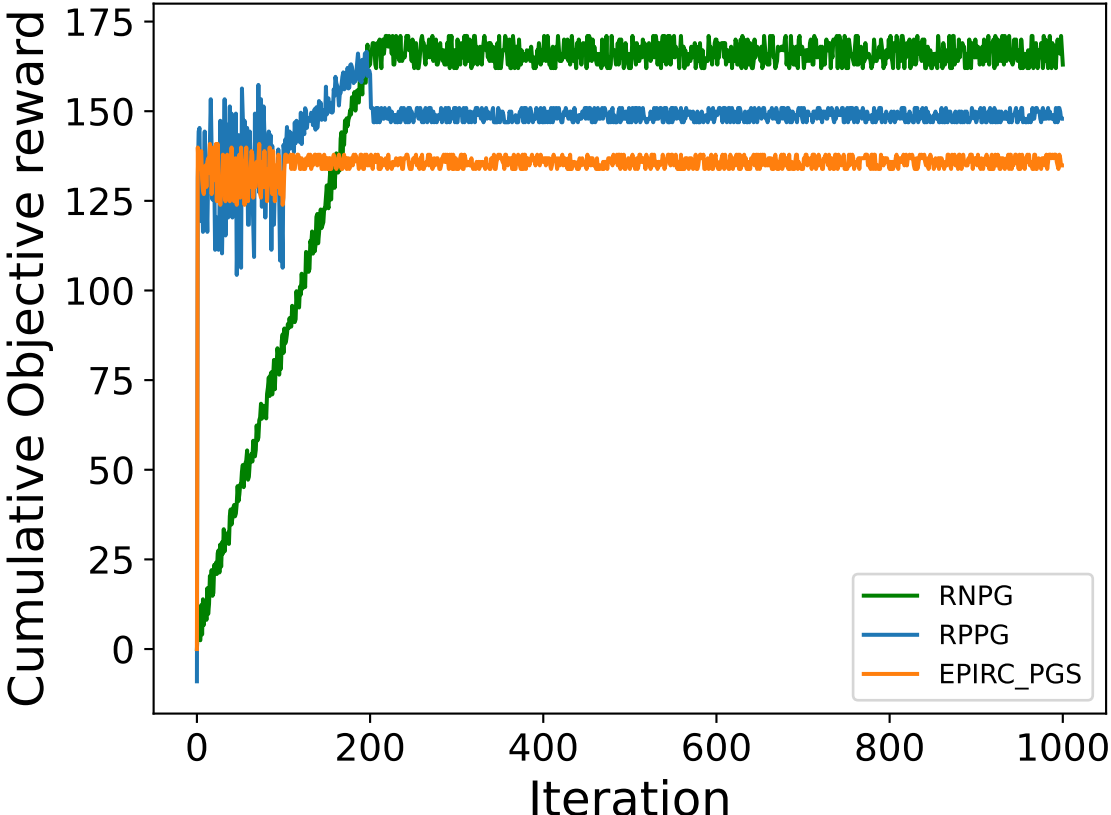

Supplement: supplementary_material [file Vf_update_GC.pdf › RNPG-main/Garbage_cleaning_bot/Vf_update_GC.pdf]

# Episode wise Value function

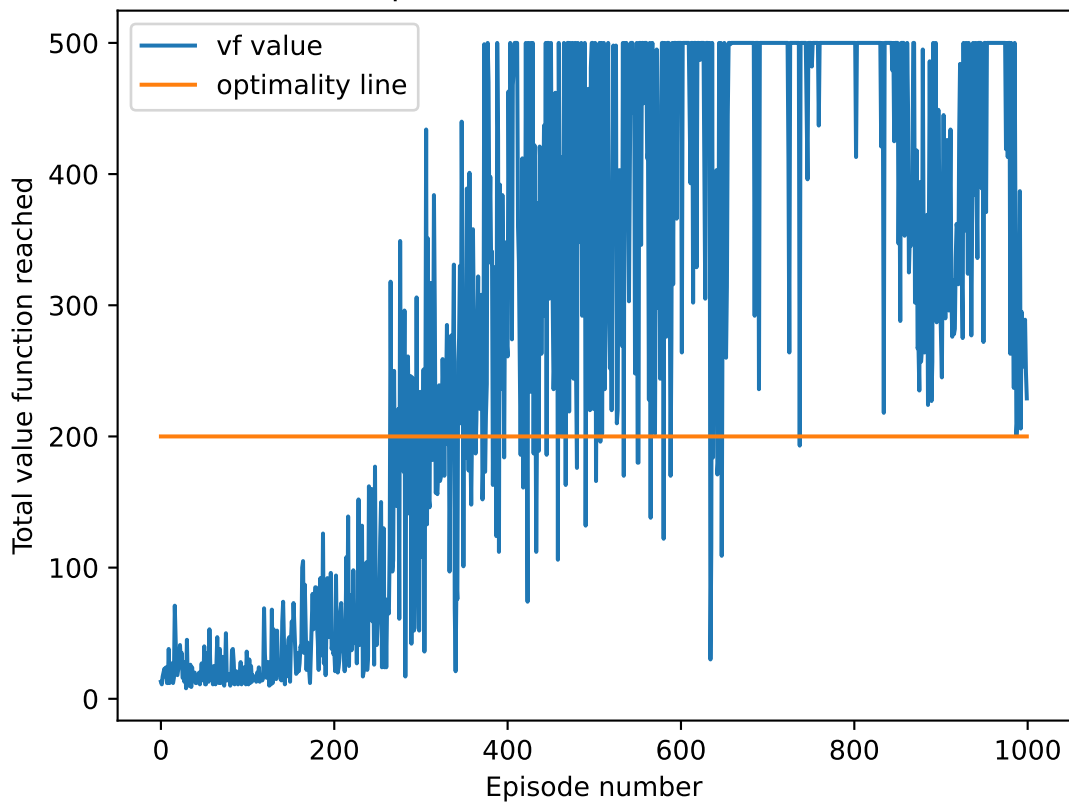

Supplement: supplementary_material [file CMDP_setting_Cartpole_vf.pdf › RNPG-main/RCAC/CMDP_setting_Cartpole_vf.pdf]

# Expected Cost vs. Safety Limit

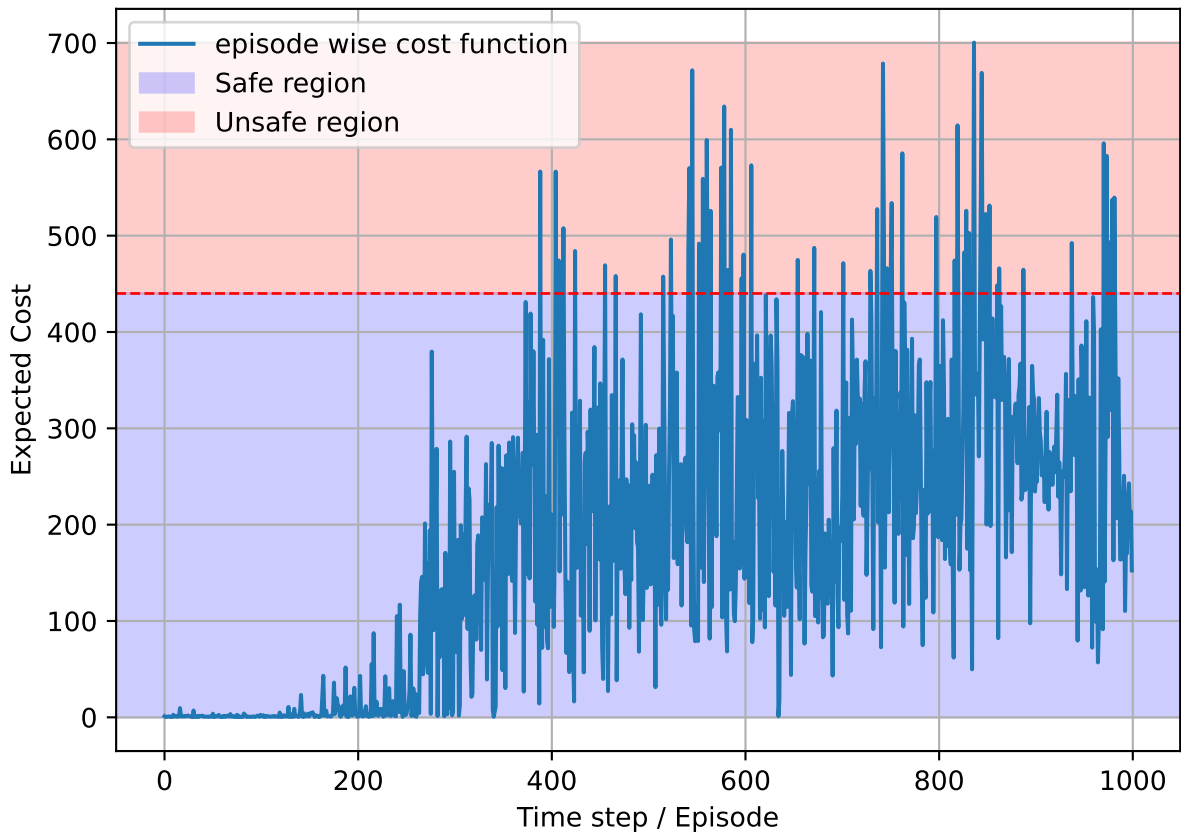

Supplement: supplementary_material [file CMDP_setting_cartpole_cost.pdf › RNPG-main/RCAC/CMDP_setting_cartpole_cost.pdf]

Episode wise Value function

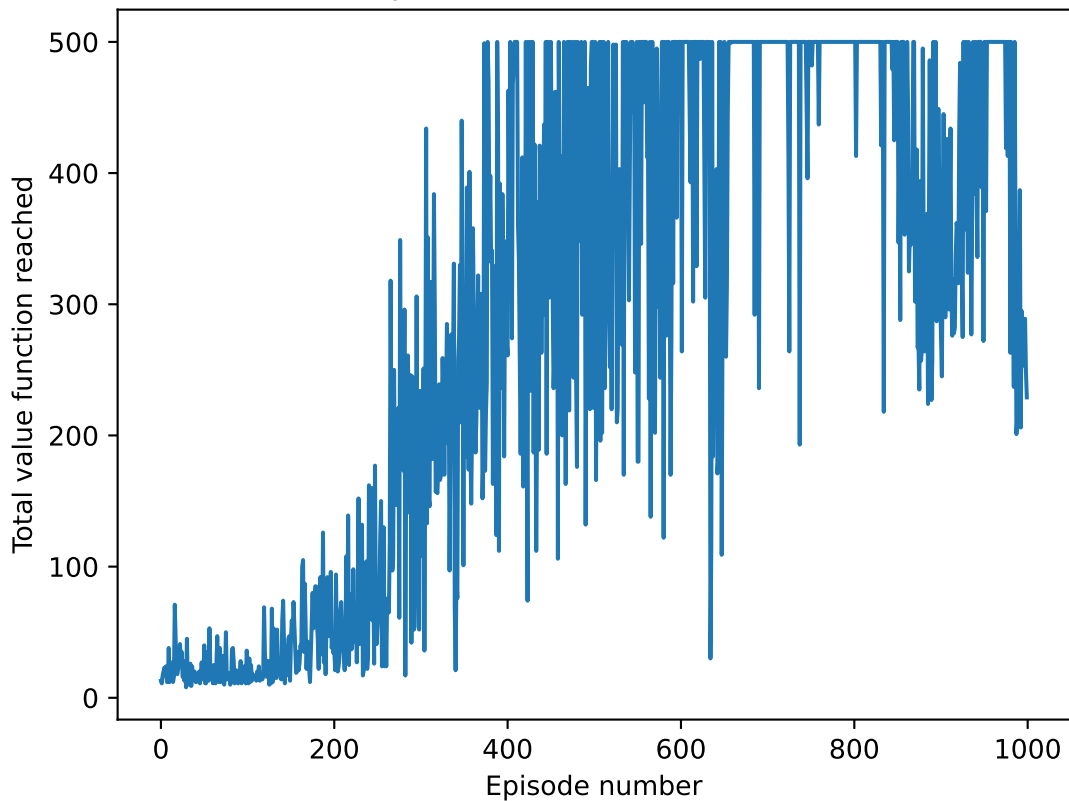

Supplement: supplementary_material [file Cartpole_episode_wise_vf.pdf › RNPG-main/RCAC/Cartpole_episode_wise_vf.pdf]

Episode wise Value function

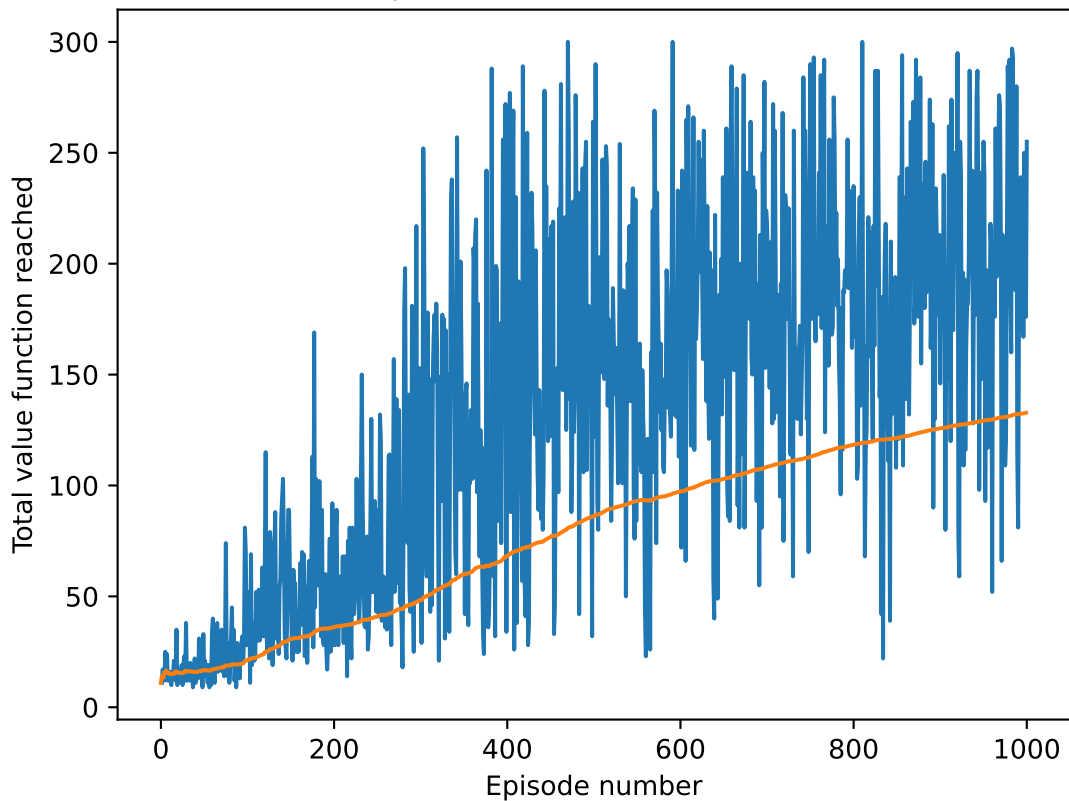

Supplement: supplementary_material [file Cartpole_episode_wise_vf_CMDP setting.pdf › RNPG-main/RCAC/Cartpole_episode_wise_vf_CMDP setting.pdf]

CartPole Trajectory with Safe/Unsafe Regions

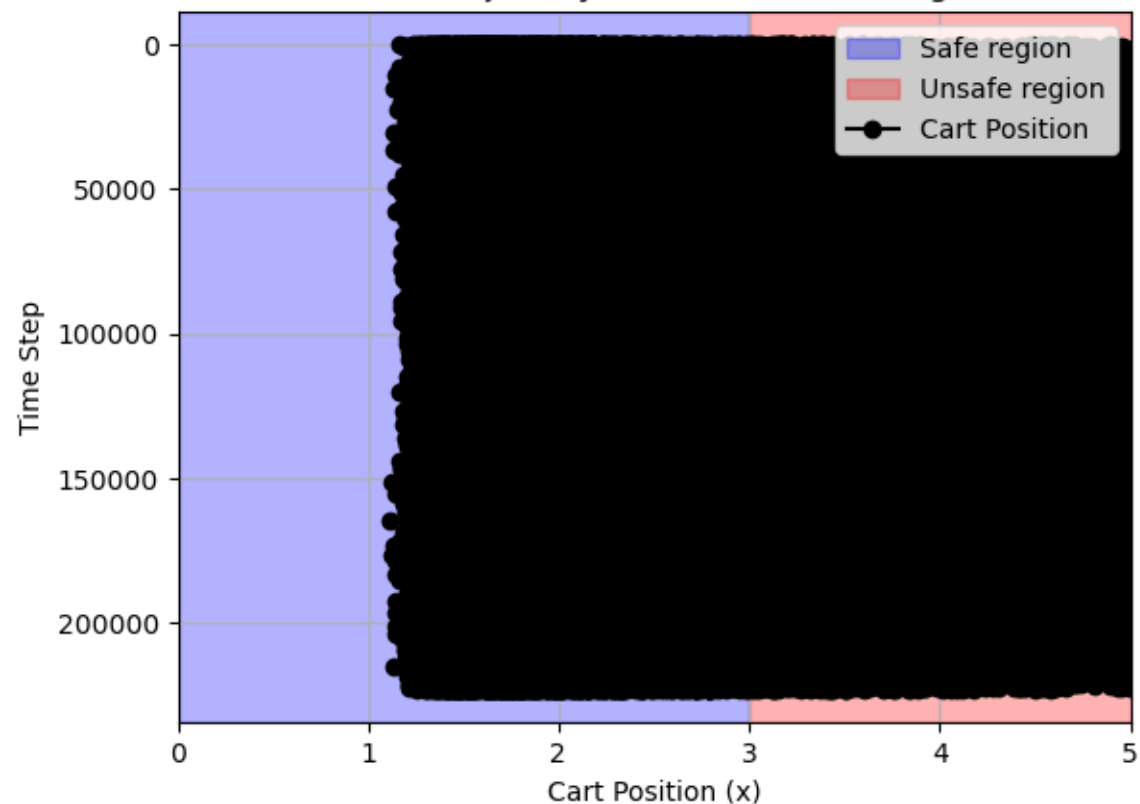

Supplement: supplementary_material [file Cartpole_positions_plot.pdf › RNPG-main/RCAC/Cartpole_positions_plot.pdf]

Number of Timesteps in Safe vs Unsafe Region

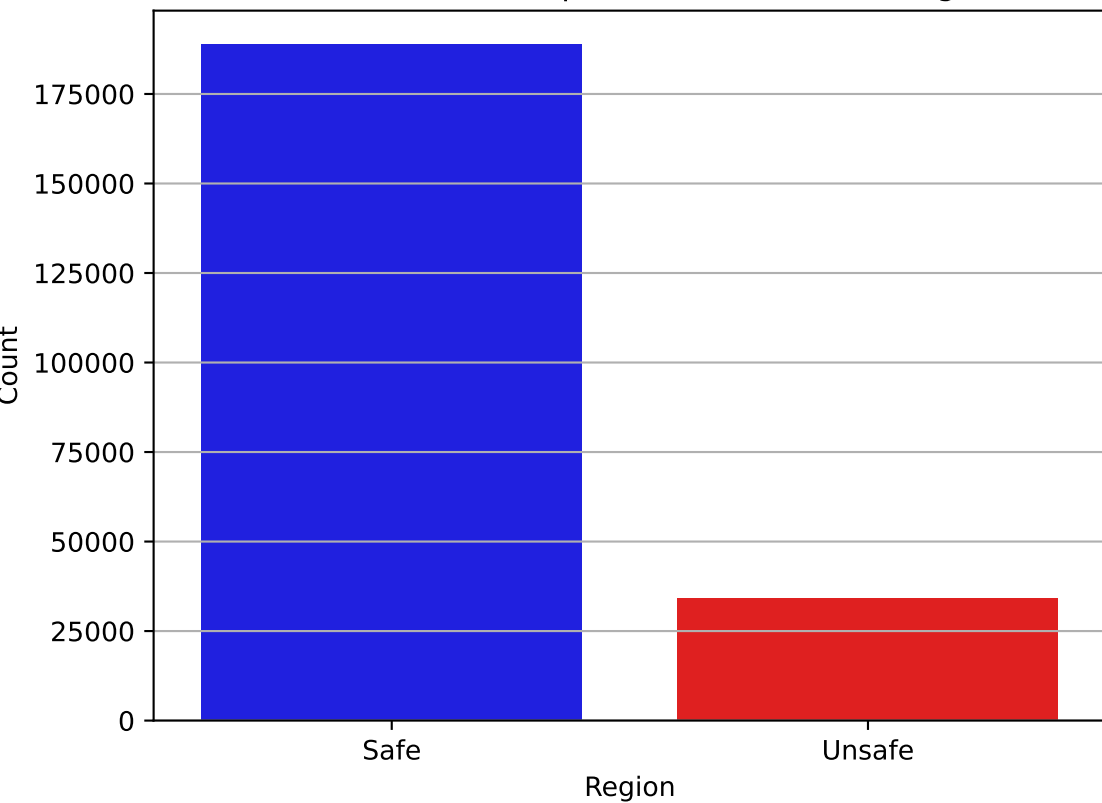

Supplement: supplementary_material [file Frequency_of_safe_and_unsafe_region_landing.pdf › RNPG-main/RCAC/Frequency_of_safe_and_unsafe_region_landing.pdf]

Episode wise Value function

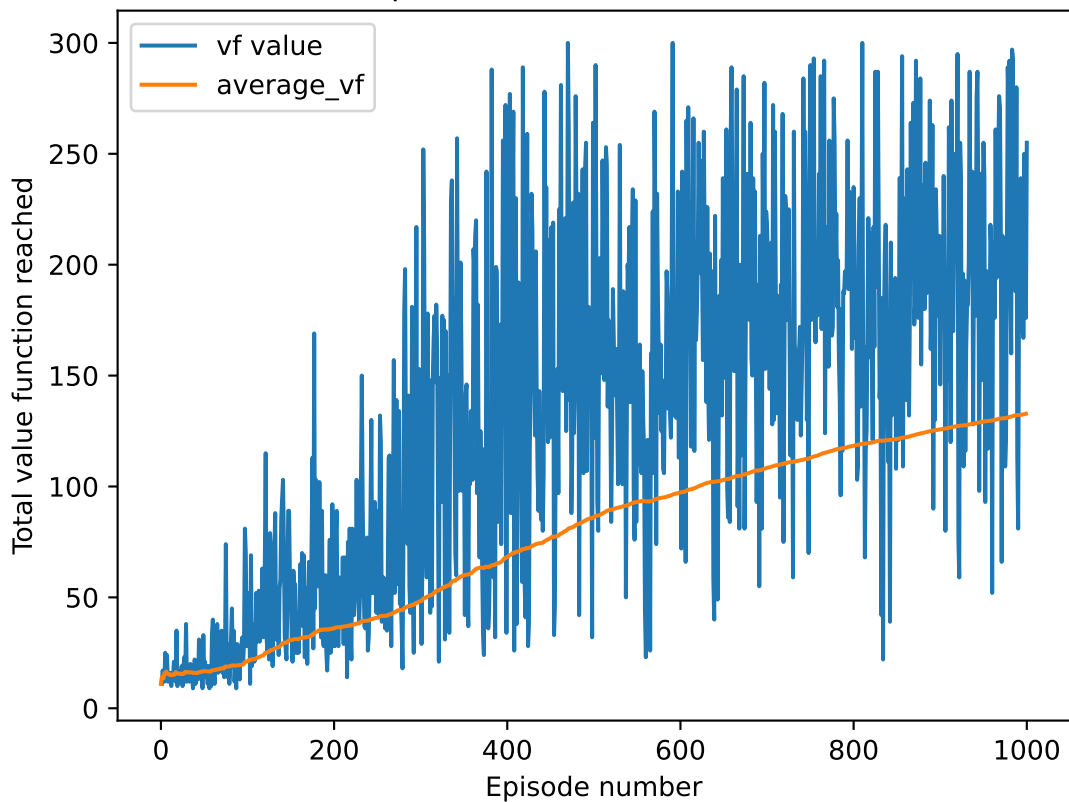

Supplement: supplementary_material [file RCMDP_setting_Cartpole_vf.pdf › RNPG-main/RCAC/RCMDP_setting_Cartpole_vf.pdf]

# Expected Cost vs. Safety Limit

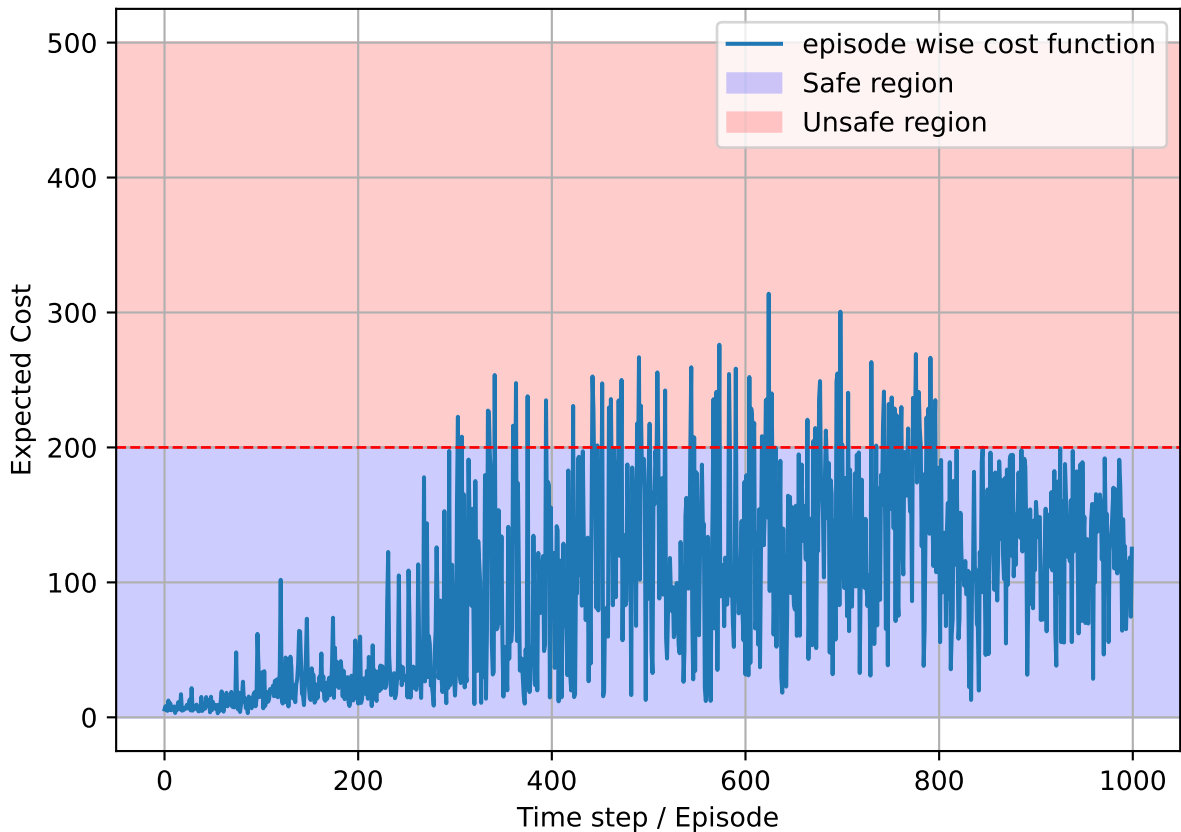

Supplement: supplementary_material [file RCMDP_setting_cartpole_cost.pdf › RNPG-main/RCAC/RCMDP_setting_cartpole_cost.pdf]

Batch wise value function

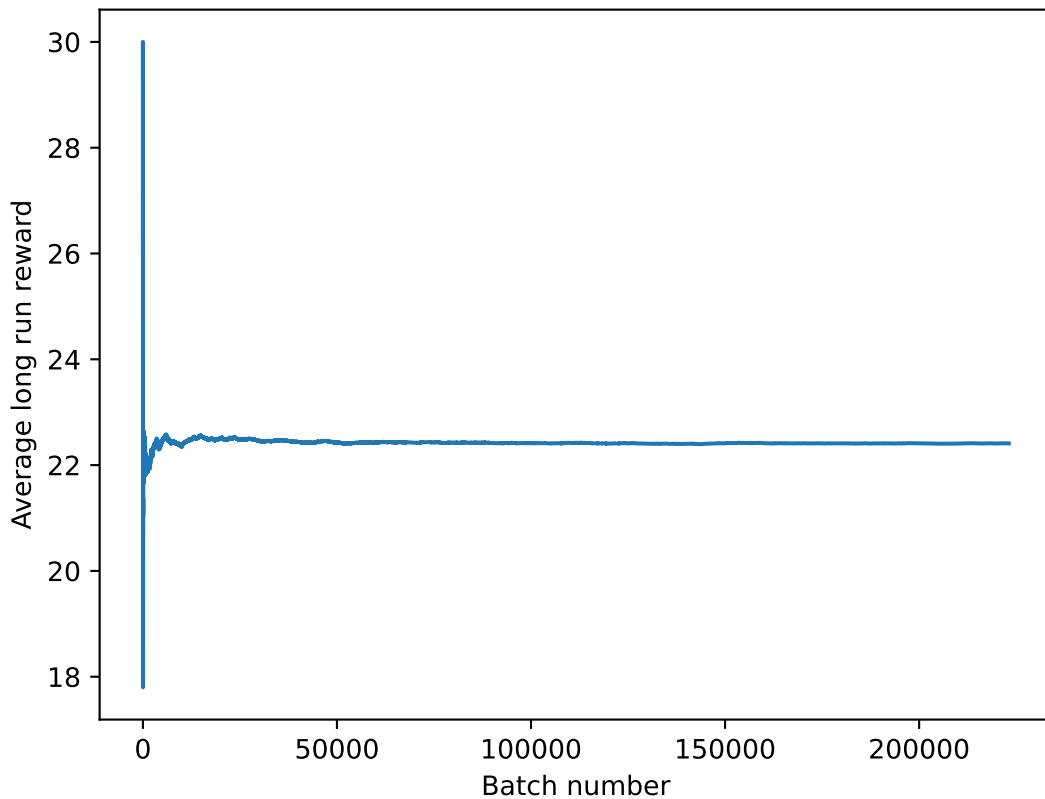

Supplement: supplementary_material [file Running average value function plot.pdf › RNPG-main/RCAC/Running average value function plot.pdf]

Batch wise value function

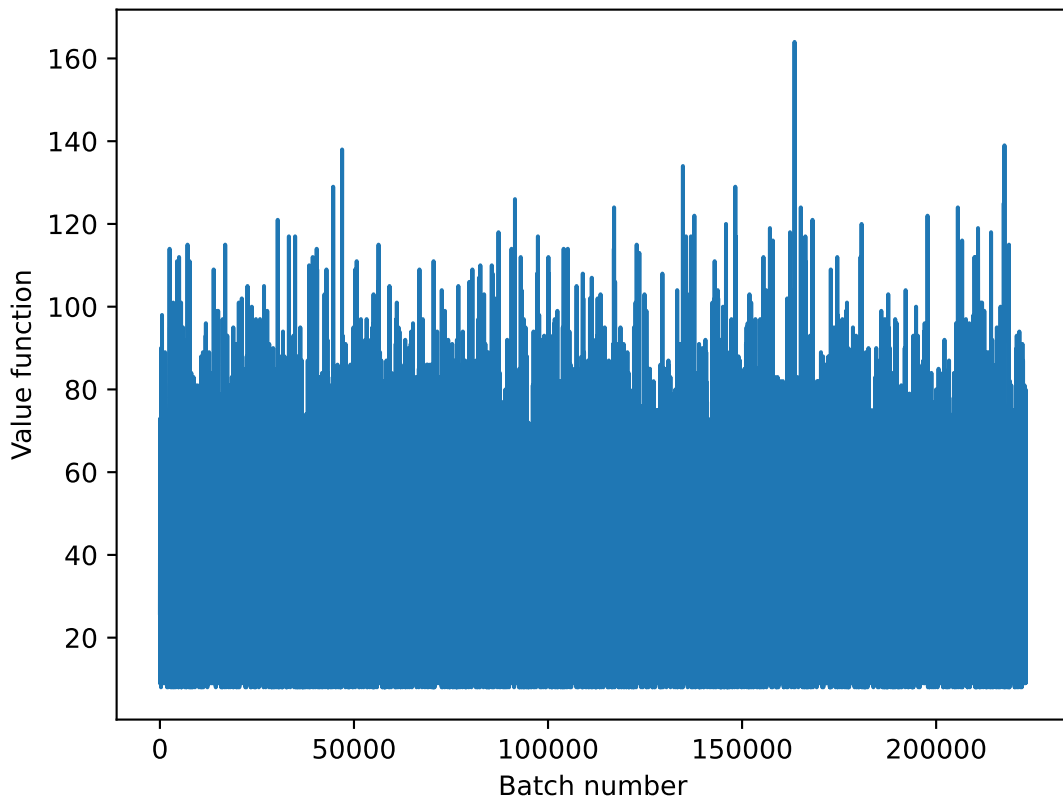

Supplement: supplementary_material [file Value function plot.pdf › RNPG-main/RCAC/Value function plot.pdf]

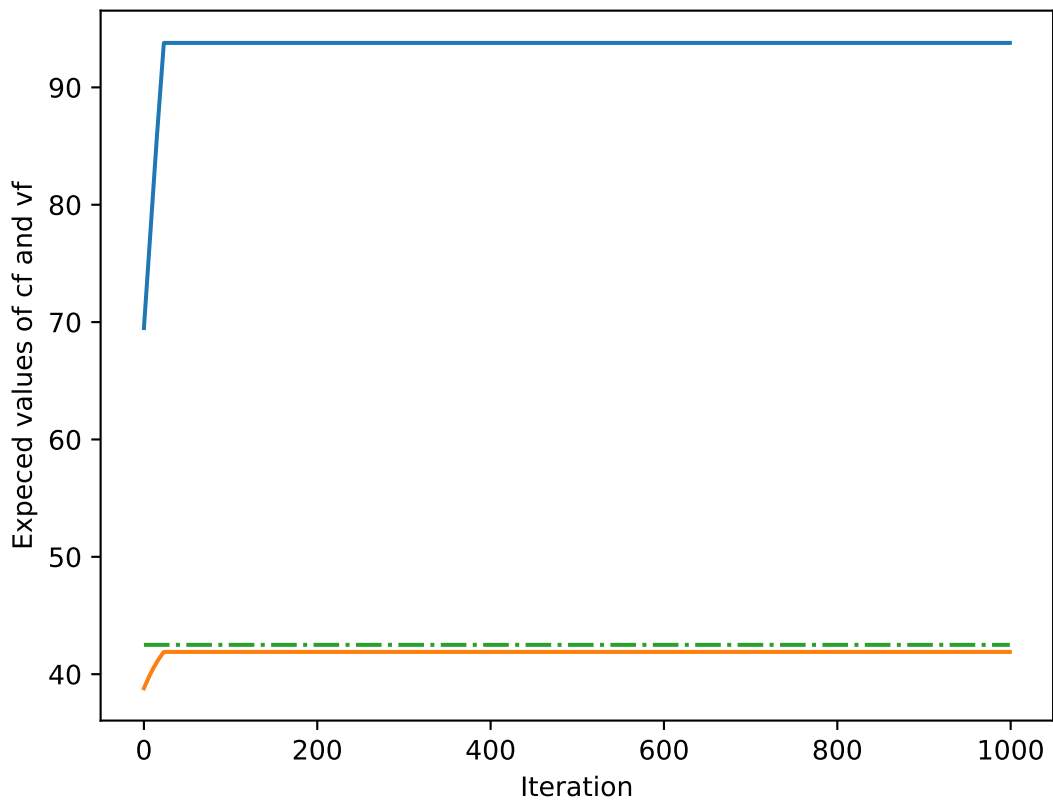

Supplement: supplementary_material [file Vf_CF_update_RPNG_only.pdf › RNPG-main/Vf_CF_update_RPNG_only.pdf]

Objective function

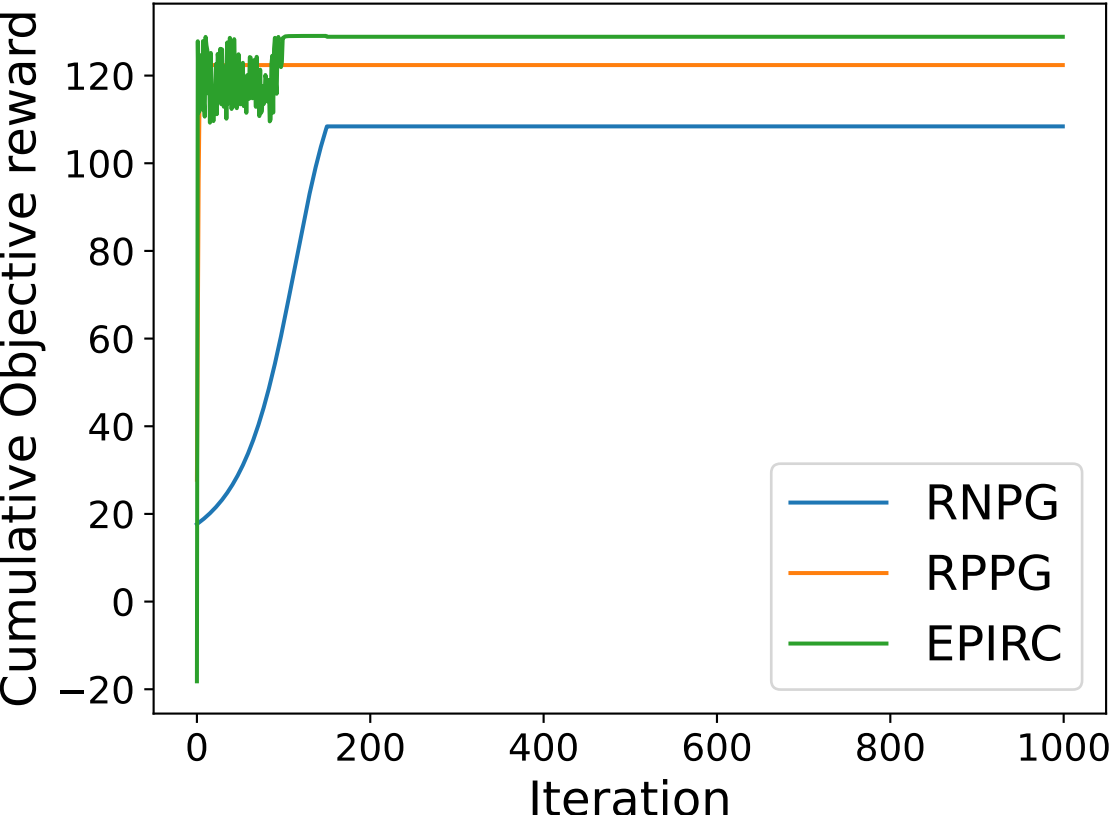

Supplement: supplementary_material [file Vf_update_CRS.pdf › RNPG-main/Vf_update_CRS.pdf]

Objective function

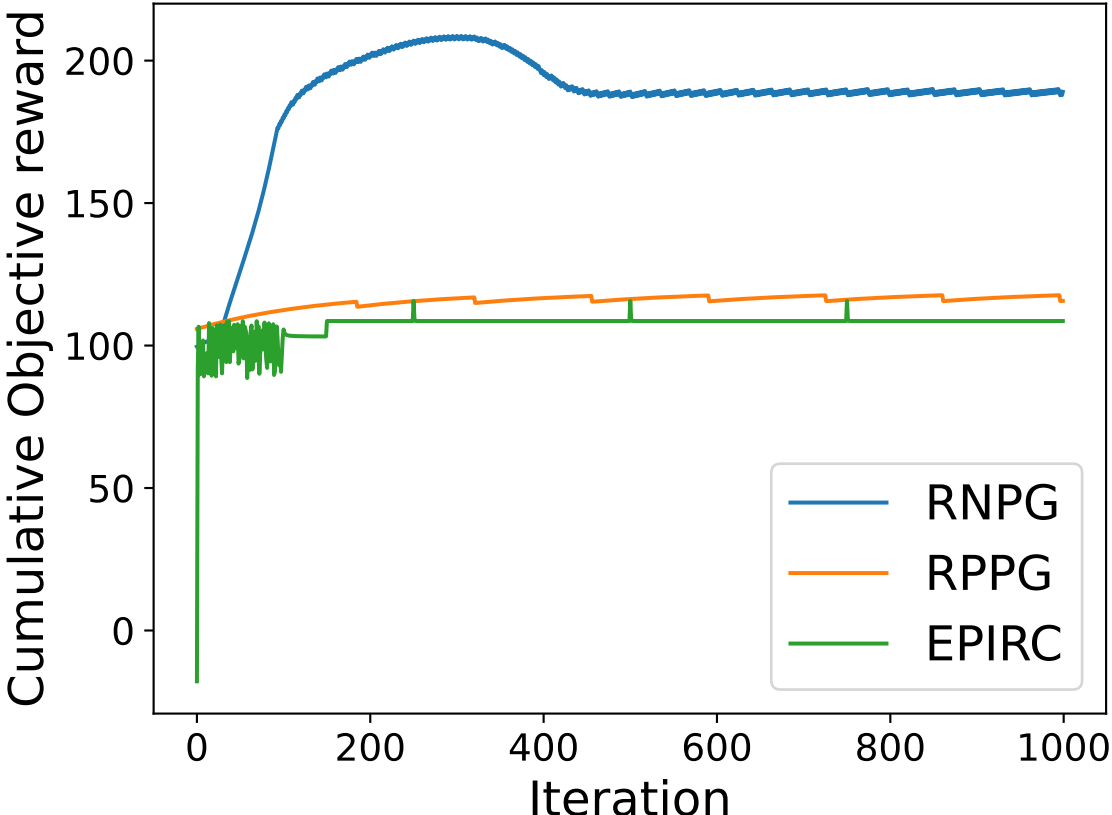

Supplement: supplementary_material [file Vf_update_Garnet.pdf › RNPG-main/Vf_update_Garnet.pdf]

Objective function

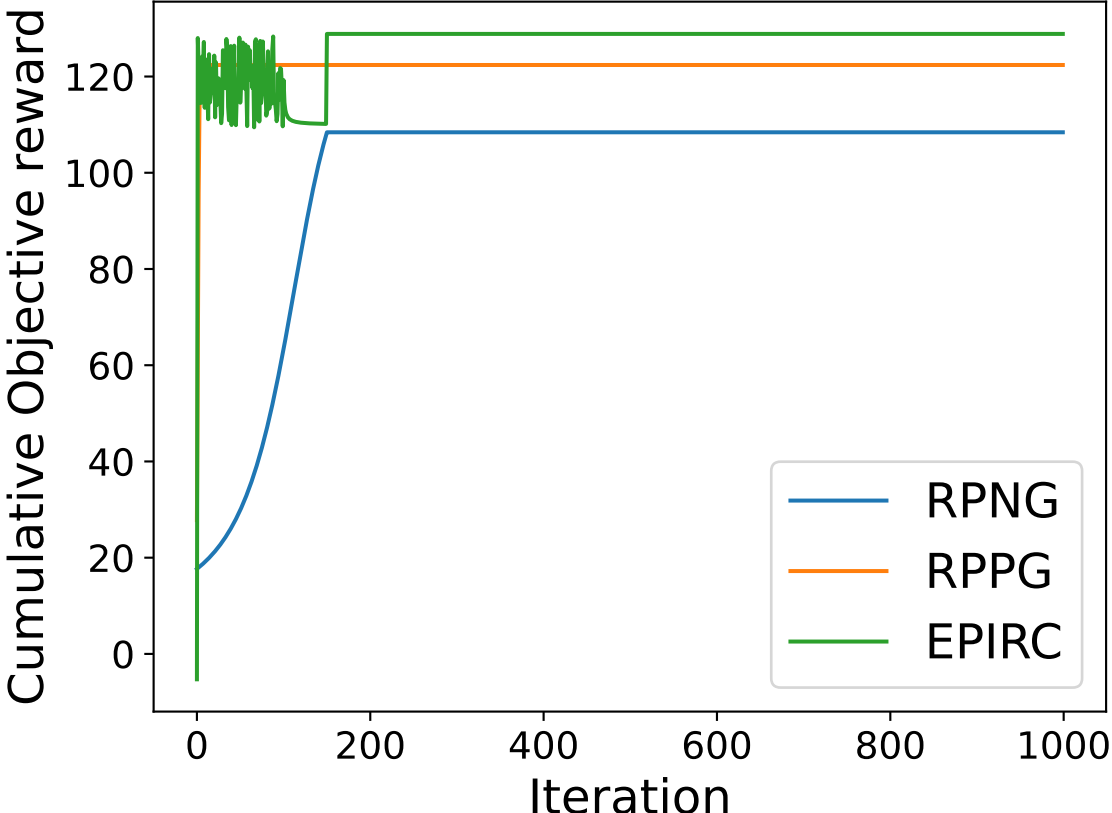

Supplement: supplementary_material [file Vf_update_RS.pdf › RNPG-main/Vf_update_RS.pdf]
